# Supplementary material for: Identification and characterization of distinct brown adipocyte subtypes in C57BL/6J mice
Source: PubMed Central journal article supplement (PMC7723269; doi:10.26508/lsa.202000924), 2020-11-30

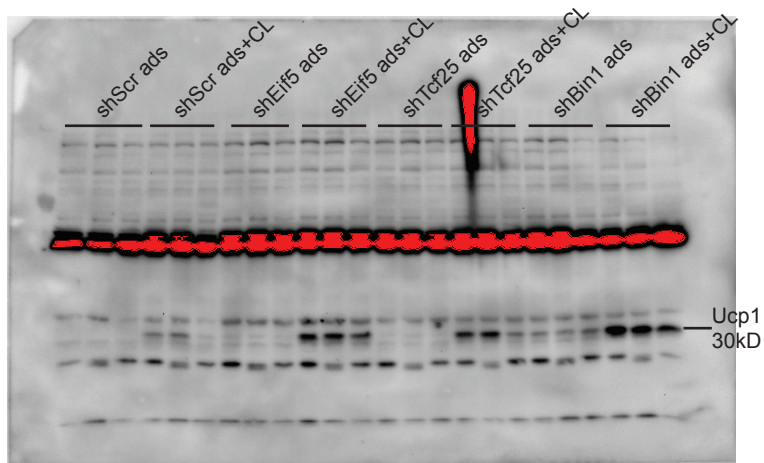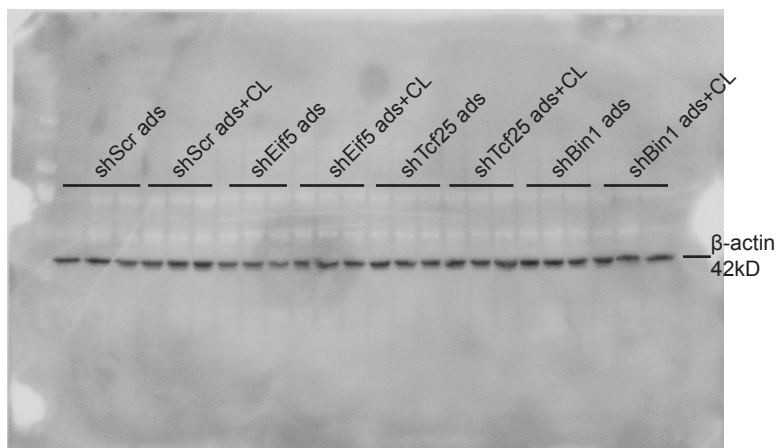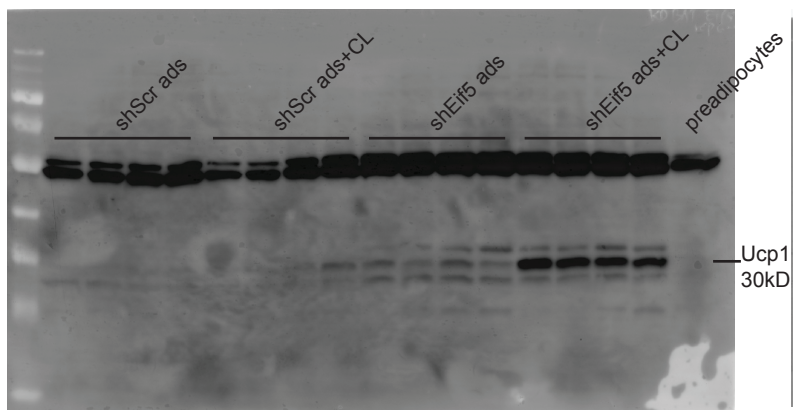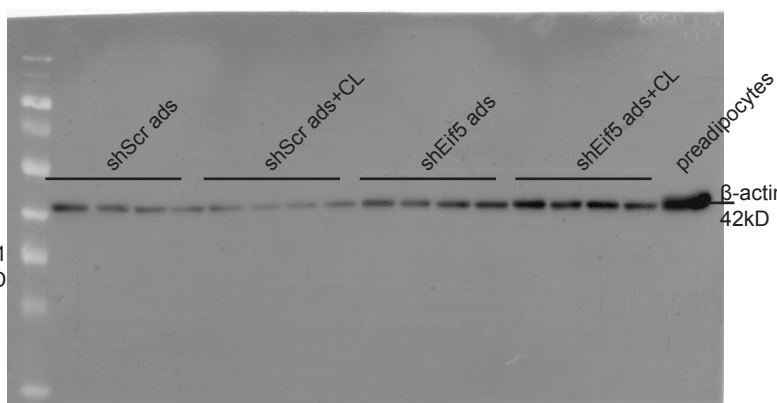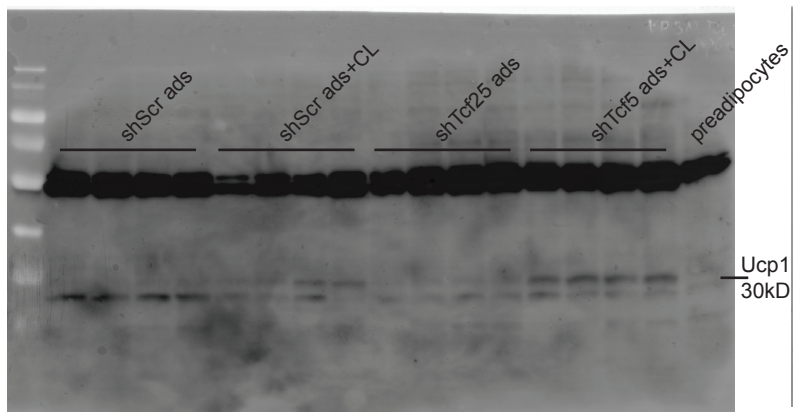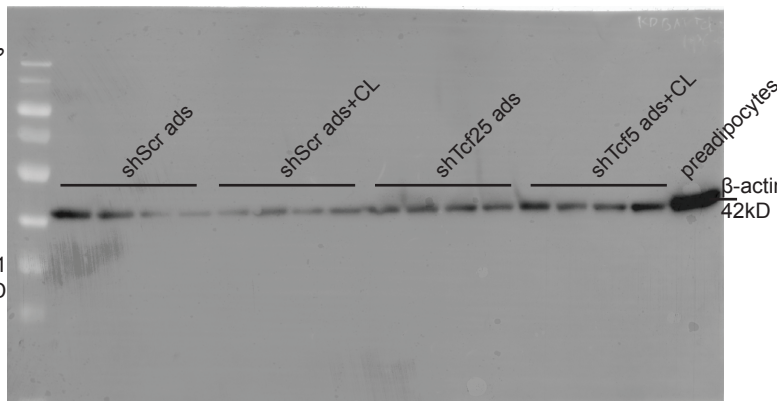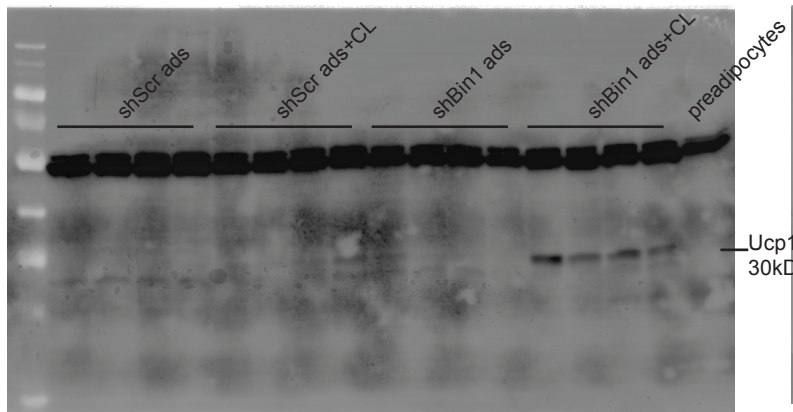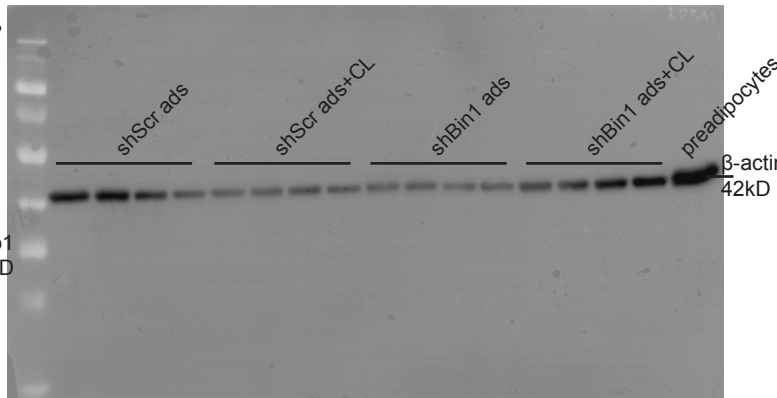

Supplement: LSA-2020-00924_SdataF7.3.pdf [file LSA-2020-00924_SdataF7.3.pdf]
