# Supplementary material for: Identification and characterization of distinct brown adipocyte subtypes in C57BL/6J mice
Source: Life Sci Alliance. 2020 Nov 30;4(1):e202000924. doi: 10.26508/lsa.202000924 (PMC7723269; doi:10.26508/lsa.202000924)
Supplement: Supplementary file 3 [file LSA-2020-00924_SdataF1.2.xlsx]

## Sheet: Sheet1
	High	Medium	Low	Very low
Tissue Slides.UCP.ucp1 1	0.453605	0.172766	0.206672	0.166958
Tissue Slides.UCP.ucp1 10	0.0710743	0.0616348	0.214473	0.652818
Tissue Slides.UCP.ucp1 11	0.126547	0.151023	0.294345	0.428085
Tissue Slides.UCP.ucp1 2	0.392484	0.192086	0.236766	0.178664
Tissue Slides.UCP.ucp1 3	0.758707	0.077323	0.0610825	0.102888
Tissue Slides.UCP.ucp1 4	0.127791	0.113111	0.309229	0.449869
Tissue Slides.UCP.ucp1 5	0.160217	0.105342	0.291297	0.443144
Tissue Slides.UCP.ucp1 6	0.4663	0.110348	0.2024	0.220953
Tissue Slides.UCP.ucp1 7	0.802108	0.0641684	0.0305571	0.103166
Tissue Slides.UCP.ucp1 8	0.587958	0.14876	0.133019	0.130263
Tissue Slides.UCP.ucp1 9	0.0470458	0.0979724	0.32655	0.528432
