# Supplementary material for: Identification and characterization of distinct brown adipocyte subtypes in C57BL/6J mice
Source: Life Sci Alliance. 2020 Nov 30;4(1):e202000924. doi: 10.26508/lsa.202000924 (PMC7723269; doi:10.26508/lsa.202000924)
Supplement: Supplementary file 9 [file LSA-2020-00924_SdataF3.xlsx]

## Sheet: Figure3A
	BAT1																				BAT2																							BAT3
	1A2	1A3	1A5	1A6	1B1	1B3	1B4	1B5	1B6	1C2	1C3	1C4	1C5	1C6	1D1	1D2	1D3	1D4	1D5	1D6	2A1	2A3	2A7	2A10	2A11	2A12	2B4	2B5	2B6	2B10	2B11	2C1	2C6	2C7	2C8	2C9	2C12	2D2	2D5	2D6	2D10	2D11	2D12	3A3	3A9	3A10	3B1	3B3	3B4
Ucp1 (log)	-0.767267	-2.66288	-0.125257	-2.35321	-0.0510609	1.20377	-1.37525	-1.55558	1.13894	-1.44923	-1.26056	-1.92664	-1.50055	-2.88894	-0.551637	-0.334099	-1.5632	-1.36888	-3.10426	-1.42161	1.09575	0.894059	0.511751	-0.656245	-1.92358	0.310061	-1.60148		1.11682	-1.92358	2.34803	-0.0210721	-2.13129	2.18849	1.13187	-3.38358	2.4835	0.9061			0.231793	-1.46	1.05963	-0.746554	-4.74423	-4.48836	-1.90251	-1.67975	-1.82725
	-0.525949	-0.312592	-0.54097	-1.56217	0.677036	0.767931	-0.980301	-0.519993	1.34243	-1.88556	-1.41496	-2.0394	-1.18507	-1.39467	-0.94417	-0.453268	-1.33543	-0.662712	-2.13094	0.289764	-0.0571957	0.0632162	0.111381	-1.3727			-2.14634	-2.15237	0.0240824		2.15237	-0.779668		2.06206	0.0150515		2.29686	0.270927			-1.34861	-2.95009	0.59905	-1.78812	-5.09042	-4.72015	-1.83026	-1.75199	-1.69179
	-1.49605	-2.46328	-1.55882	-0.429794	-0.376125	-1.0658	-1.19917	-1.90314	-0.479277	-2.41106	-1.69589	-1.84071	-1.13637	-2.45971	-1.28144	-0.136735	-1.73209	-1.60933	-4.01899	-1.95986	0.556906	0.7014	0.168577	-0.969317	-1.81822	-0.508741	-3.40766	-2.76948	0.812781		1.78812	-0.276948	0.195669	1.67674	0.346185	-3.29929	2.00486	0.466596	-4.25957	-3.83512	0.487669	-2.04098	0.587009	-0.189649	-3.13071	-4.4703	-1.21315	-1.54428	-1.68577
	-2.24307	-2.75764	-2.18147	-2.45572	-0.840512	-2.61676	-1.93123	-2.19583	-0.5422	-3.05178	-2.9085	-2.48004	-3.32128	-3.40789	-1.30601	-2.03027	-2.18248	-1.63303	-3.32585	-1.59874	0.40338	0.325112	-0.532823	-1.65867	-2.05904	-0.951255		-3.31133	0.863956	-1.80317	1.45398	-0.577978		1.23422	0.0270926		1.96272	0.252865	-4.32022	-3.4498	0.319092	-2.79356	0.481648	-0.0632163	-3.19092	-3.22704	-1.95067	-1.69179	-1.60148
	-1.16448	-2.76212	-1.75198	-1.80899	-0.472306	0.330017	-1.00326	-1.58279	0.818676	-2.4274	-1.88405	-1.88668	-2.19421	-3.62282	-1.18895	-0.517107	-1.511	-1.29625	-2.06885	-0.74164
[truncated: 18 more columns]

## Sheet: Figure3B
	BAT 1																				Brown	Beige	White
	A2	A3	A5	A6	B1	B3	B4	B5	B6	C2	C3	C4	C5	C6	D1	D2	D3	D4	D5	D6
Tmem26	0.0435857	0.0245182	0.194791	0.0507658	0.0253829	0.0270168	0.0277763	0.0853775	0.0651541		0.0476956	0.075363	0.0217929	0.0379436	0.0480274	0.0401071	0.0708052	0.271684	0.0669858	0.130308	0.0423939	0.0103087	0.00961832
	0.114229	0.0511189	0.178006	0.234881	0.0507658	0.0252075	0.0358968	0.0395549	0.447512	0.02836	0.0480274	0.0415214	0.0277763	0.0105253	0.0245182	0.0127797	0.03983	0.264255	0.0698305	0.136787	0.0303955	0.00854917	0.013139
	0.105112	0.0529216	0.119908	0.0332616	0.0165159	0.0665231	0.0660636	0.0196408	0.0712977	0.0240137	0.0842021	0.11744	0.0358968	0.049721	0.108067	0.0774817	0.0853775	1.31039	0.106579	0.233258	0.0412346	0.0135084	0.0195052
	0.314253	0.659754	0.378929	0.641713	1.16473	0.895025	0.25	0.482968	2.37841	0.348686	0.590496	0.673617	0.852635	0.888843	0.768438	1.65864	1.69349	3.94493	1.64718	3.24901		0.0114382	0.0094859
	0.846745	0.939523	0.716978	0.779165	1.11729	0.716978	0.289172	0.655197	2.58471	0.266093	0.63728	0.264255	0.539614	0.993093	0.80107	0.876606	0.598739	1.86607	1.30134	2.23457
	0.852635	1.05702	0.864537	0.406126	0.76313	1.18921	0.429283	0.823591	2.71321	0.239816	0.664343	0.737135	0.251739	0.411795	0.535887	0.895025	0.835088	2.01391	1.62451	1.72907
	1.67018	0.655197	1.8025	1.79005	1.43396	1.38511	0.655197	0.678302	4.50023	0.170755	1.29235	1.03527	0.598739	1.13288	1.61328	0.535887	0.50698		0.532185	4.72397
	0.692555	0.279322	0.510506	0.295248	0.570382	0.716978	0.45376	0.742262	1.16473	0.052193	0.198884	0.641713	0.150726	0.109576	1.14076	0.45376	0.384219	3.68075	0.528509	0.846745
Prdm16	0.323088	0.0712977	0.406126	0.273573	0.429283	0.336808	0.301452	0.343886	1.37554	0.0109722	0.060371	0.135842	0.0285572	0.0214928	0.100134	0.0780207	0.188156	0.360982	0.0540336	0.376312	0.075363	0.0328036	0.0279695
	0.132127	0.00995751	0.0813339	0.0665231	0.150726	0.0902456	0.0712977	0.120742	0.19751	0.00529924	0.0275845	0.0947323	0.0243489	0.0155171	0.0743254	0.0708052	0.060371	0.147624	0.0138882	0.0960547	0.108067	0.0231957	0.0277763
	0.205898	0.0101667	0.171943	0.0994421	0.157127	0.0158431	0.147624	0.073812	0.29937	0.00306478	0.0169802	0.210224	0.0122591	0.0180732	0.220676	0.231647	0.358489	0.251739	0.0137922	0.269807	0.073812	0.034674	0.047039
	0.76313	0.060371	0.543368	0.473029	0.920188	0.122427	0.768438	0.63728	2.17347	0.00571908	0.0441942	0.554785	0.036906	0.0547879	0.864537	0.411795	1.13288	0.939523	0.0473661	0.779165		0.0316862	0.0231957
Ppargc1a	0.707107	0.384219	0.933033	0.870551	0.952638	0.784584	0.773783	0.823591	2.09943	0.376312	0.334482	0.346277	0.223756	0.0743254	0.289172	0.246558	0.323088	0.210224	0.170755	0.444421	0.0319066	0.139661	0.0532897
	0.773783	0.244855	0.598739	0.320856	0.343886	0.20733	0.34151	0.659754	0.460094	0.291183	0.214641	0.283221	0.22688	0.208772	0.220676	0.257028	0.257028	0.303549	0.275476	0.870551	0.0325771	0.188156	0.0638133
	0.408951	0.133972	0.241484	0.287175	0.289172	0.0583146	0.334482	0.203063	0.641713	0.175556	0.128514	0.312083	0.181747	0.0412346	0.25	0.269807	0.479632	0.225313	0.0674518	0.356013	0.0279695	0.144586	0.0392817
	0.876606	0.108819	0.348686	0.411795	0.812252	0.154964	0.784584	0.646176	2.01391	0.060371	0.0818996	0.45376	0.184284	0.0947323	0.757858	0.408951	1.04247	0.469761	0.105843	0.687771		0.184284	0.0529216
Ucp1	0.170896	0.00217332	0.749451	0.00443394	0.889077	15.987	0.042145	0.0278242	13.7702	0.0355442	0.0548829	0.0118403	0.0315827	0.00129139	0.280778	0.463341	0.0273399	0.0427684	0.000786573	0.0378785	0.00916277	0.0136023	9.2512e-05
	0.297887	0.486864	0.28776	0.0274048	4.75374	5.86045	0.10464	0.302	22.0004	0.013015	0.0384625	0.00913273	0.0653027	0.040302	0.113718	0.352154	0.0461924	0.217414	0.00739713	1.94878	0.00982042	0.00903663	8.51284e-05
	0.031912	0.0034413	0.0276171	0.371712	0.420606	0.0859418	0.0632169	0.0124987	0.331683	0.00388093	0.0201423	0.0144309	0.0730525	0.00346969	0.0523067	0.729903	0.0185316	0.0245849	9.57215e-05	0.0109683	0.0055627	0.00412898	7.8879e-05
	0.00571383	0.00174726	0.00658453	0.0035017	0.144374	0.0024168	0.0117157	0.00637038	0.286946	0.000887606	0.00123451	0.00331098	0.000477222	0.000390943	0.0494295	0.00932681	0.00656939	0.0232791	0.000472225	0.0251918		0.0107464	0.000104081
	0.0684727	0.00172933	0.0177017	0.0155242	0.33705	2.13805	0.099253	0.026134	6.58682	0.00373767	0.0130603	0.0129812	0.00639433	0.000238333	0.0647223	0.304013	0.030832	0.0505538	0.008534	0.181284
Cd137	0.000705044	0.00418662	0.000296434	0.00140035	0.0100965	0.00537321	0.000760903	0.00112958	0.000709948		0.0115177	0.000653285	0.0384733	0.00207885	0.00300171	0.00340059	0.000969817	0.000596992	0.00193963	0.00280069	0.00630189	0.0679209	0.0412346
	0.00335377	0.0259162	0.000461942	0.000760903	0.00104665	0.00255936	0.000838443	0.000359929	0.00146997	0.00111403	0.018453	0.000322145	0.00533609	0.00170029	0.000183746	0.00116941	0.000491678	0.000695337	0.00193963	0.000422137	0.00860863	0.0540336	0.0287559
	0.00146997	0.105112	0.00128858	0.00328475	0.013697	0.0183255	0.00125335	0.00282017	0.00170029	0.179244	0.171943	0.00367001	0.060371	0.0197774	0.0110485	0.00734002	0.00361948	0.00321715	0.00474295	0.00379943	0.0109722	0.0473661	0.0390103
		0.255253	0.00961832	0.10083	0.351111	0.0483614	0.00625836	0.00982042	0.0486978	0.0802141	0.156041	0.0122591	0.309927	0.0688691	0.0994421	0.149685	0.0126038	0.0214928	0.0717937	0.0409498		0.0547879	0.0379436
	0.0241807	0.15283	0.00393342	0.0253829	0.0612138	0.0415214	0.0264608	0.0211969	0.0493776	0.178006	0.469761	0.0248605	0.476319	0.0511189	0.03983	0.25	0.0224055	0.040386	0.07966	0.0133224
	0.0220971	0.160428	0.00885066	0.0192366	0.0877778	0.156041	0.0188407	0.00734002	0.0328036	0.0435857	0.316439	0.0532897	0.400535	0.368567	0.141611	0.0883884	0.0112807	0.0137922	0.0967228	0.0532897
	0.0421011	0.678302		0.178006	0.188156	0.0421011	0.0153034	0.00515433	0.0415214	0.142595	0.768438	0.0587202	0.570382	0.267943	0.101532	0.0708052	0.0185814	0.0638133	0.0065695	0.040386
	0.000313336	0.106579	0.00359448	0.0183255	0.0480274	0.0915054	0.0115177	0.00583925	0.00264962	0.0401071	0.314253	0.013139	0.262429	0.018453	0.0647041	0.00854917	0.0113592	0.00377319	0.026278	0.00127968

## Sheet: Figure3C
		BAT1																				BAT2																							BAT3
		1A2	1A3	1A5	1A6	1B1	1B3	1B4	1B5	1B6	1C2	1C3	1C4	1C5	1C6	1D1	1D2	1D3	1D4	1D5	1D6	2A1	2A3	2A7	2A10	2A11	2A12	2B4	2B5	2B6	2B10	2B11	2C1	2C6	2C7	2C8	2C9	2C12	2D2	2D5	2D6	2D10	2D11	2D12	3A3	3A9	3A10	3B1	3B3
Ucp1 (log a.u.)	Mean	3.761	2.808	3.768	3.278	4.787	4.724	3.702	3.449	5.456	2.755	3.167	2.965	3.133	2.245	3.946	4.306	3.335	3.686	2.07	3.914	5.5	5.496	5.065	3.836	3.066	4.617	2.615	2.256	5.704	3.137	6.936	4.586	4.032	6.79	5.38	1.659	7.187	5.474	0.7404	1.358	4.922	2.689	5.682	4.303	0.9609	0.7735	3.276	3.333
	SEM	0.3009	0.4729	0.3861	0.3633	0.2555	0.6982	0.1739	0.2832	0.4034	0.2715	0.2899	0.1161	0.4096	0.3959	0.141	0.3402	0.144	0.1756	0.371	0.3969	0.2377	0.1864	0.2179	0.2206	0.0697	0.3695	0.5349	0.3348	0.2363	0.06021	0.1981	0.1668	1.163	0.215	0.2621	0.04214	0.1236	0.1519	0	0.1927	0.427	0.3462	0.1287	0.3929	0.5121	0.338	0.1721	0.04384
Pparg	Mean	18.87	2.107	14.04	12.67	20.91	14.63	11.81	16	31.92	6.732	3.89	16.49	5.551	0.3354	10.54	3.988	12.35	22.59	0.6925	22.02	11.25	10.37	8.752	9.692	7.103	15.8	3.16	0.09954	9.164	0.09677	18.12	7.68	0.4191	17.45	9.78	0.7524	23.45	12.84	0.4634	0.2743	9.742	4.277	13.65	9.866	0.1953	0.114	5.788	5.301
	SEM	3.14	1.33	3.842	3.943	5.465	2.837	1.481	3.924	4.558	1.783	1.343	3.172	1.459	0.06788	1.841	1.326	2.743	2.972	0.1359	4.231	2.184	1.418	1.392	1.994	1.38	1.486	1.714	0.02854	1.281	0.03696	1.58	0.9299	0.2517	4.402	1.936	0.1068	1.947	2.566	0.104	0.06519	0.4195	1.182	2.271	3.091	0.05459	0.01016	0.9629	0.6648
Prdm16 (log)	Mean	0.3561	0.03795	0.3007	0.2281	0.4143	0.1413	0.3222	0.2939	1.011	0.006264	0.03728	0.2489	0.02552	0.02747	0.3149	0.1981	0.435	0.425	0.03227	0.3803	0.539	0.4921	0.5546	0.2982	0.1056	0.3137	0.2283	0.01539	0.6562	0.04857	0.9356	0.29	0.04671	0.9815	0.5641	0.2773	1.286	0.7217	0.01456	0.007325	0.4306	0.1546	0.9079	0.2053	0.03448	0.01972	0.08618	0.06254
	SEM	0.1413	0.01625	0.1059	0.09342	0.1807	0.06888	0.1563	0.1287	0.4701	0.001674	0.009518	0.1047	0.005132	0.009189	0.186	0.08032	0.2405	0.177	0.01073	0.1449	0.1708	0.1338	0.1343	0.06448	0.03119	0.217	0.04154	0.008465	0.142	0.04293	0.3065	0.06593	0.01761	0.2657	0.1854	0.07183	0.247	0.1209	0.006383	0.002214	0.1061	0.04698	0.2369	0.05806	0.01164	0.004063	0.01346	0.008807
Ppargc1a (log)	Mean	0.6916	0.218	0.5305	0.4726	0.5995	0.3013	0.5586	0.5831	1.304	0.2259	0.1899	0.3488	0.2042	0.1048	0.3794	0.2956	0.5256	0.3022	0.1549	0.5897	4.004	2.693	4.098	1.073	0.2728	1.413	0.2406	0.02803	5.199	0.05967	12.4	1.993	0.5919	12.28	2.904	0.1615	18.01	3.08	0.08193	0.01788	1.992	0.08219	1.955	1.303	0.0449	0.02451	0.4861	0.3631
	SEM	0.1005	0.0628	0.1536	0.1352	0.1662	0.164	0.1274	0.133	0.4366	0.06881	0.05549	0.03727	0.01224	0.03638	0.1269	0.03809	0.1785	0.05948	0.0455	0.117	0.9673	0.4056	0.5355	0.354	0.04682	0.778	0.1255	0.007888	0.6393	0.02644	2.756	0.3709	0.5792	2.981	0.6459	0.03365	2.713	0.6001	0.01978	0.003266	0.2922	0.02704	0.4821	0.4591	0.0191	0.006976	0.09305	0.02616
[truncated: 19 more columns]

## Sheet: Figure3D
		BAT1																				BAT2																							BAT3
		1A2	1A3	1A5	1A6	1B1	1B3	1B4	1B5	1B6	1C2	1C3	1C4	1C5	1C6	1D1	1D2	1D3	1D4	1D5	1D6	2A1	2A3	2A7	2A10	2A11	2A12	2B4	2B5	2B6	2B10	2B11	2C1	2C6	2C7	2C8	2C9	2C12	2D2	2D5	2D6	2D10	2D11	2D12	3A3	3A9	3A10	3B1	3B3
Ucp1 (log)	Normal differentiation	-0.525949	-0.312592	-0.54097	-1.56217	0.677036	0.767931	-0.980301	-0.519993	1.34243	-1.88556	-1.41496	-2.0394	-1.18507	-1.39467	-0.94417	-0.453268	-1.33543	-0.662712	-2.13094	0.289764	1.09575	0.894059	0.511751	-0.656245	-1.92358	0.310061	-1.60149		1.11682	-1.92358	2.34803	-0.0210721	-2.13129	2.18849	1.13187	-3.38358	2.4835	0.9061			0.231793	-1.46	1.05963	-0.746555	-4.74423	-4.48836	-1.9025	-1.67975
		-1.49605	-2.46328	-1.55882	-0.429794	-0.376125	-1.0658	-1.19917	-1.90314	-0.479277	-2.41106	-1.69589	-1.84071	-1.13637	-2.45971	-1.28144	-0.136735	-1.73209	-1.60933	-4.01899	-1.95986	-0.0571956	0.0632162	0.111381	-1.3727			-2.14636	-2.15237	0.0240824		2.15237	-0.779667		2.06206	0.0150515		2.29686	0.270927			-1.34861	-2.95001	0.59905	-1.78811	-5.09042	-4.72015	-1.83027	-1.752
		-2.24307	-2.75764	-2.18147	-2.45572	-0.840512	-2.61676	-1.93123	-2.19583	-0.5422	-3.05178	-2.9085	-2.48004	-3.32128	-3.40789	-1.30601	-2.03027	-2.18248	-1.63303	-3.32585	-1.59874	0.556906	0.7014	0.168577	-0.969315	-1.81821	-0.508741	-3.40782	-2.76948	0.812781		1.78812	-0.276948	0.195669	1.67674	0.346185	-3.29929	2.00486	0.466596	-4.25957	-3.83512	0.487669	-2.04101	0.587009	-0.189649	-3.13071	-4.4703	-1.21315	-1.54429
		-0.767267	-2.66288	-0.125257	-2.35321	-0.0510609	1.20377	-1.37525	-1.55558	1.13894	-1.44923	-1.26056	-1.92664	-1.50055	-2.88894	-0.551637	-0.334099	-1.5632	-1.36888	-3.10426	-1.42161	0.40338	0.325112	-0.532823	-1.65868	-2.05904	-0.951255		-3.31133	0.863956	-1.80317	1.45398	-0.577977		1.23422	0.0270926		1.96272	0.252865	-4.32022	-3.4498	0.319092	-2.79344	0.481648	-0.0632164	-3.19092	-3.22704	-1.95067	-1.6918
		-1.16448	-2.76212	-1.75198	-1.80899	-0.472306	0.330017	-1.00326	-1.58279	0.818676	-2.4274	-1.88405	-1.88668	-2.19421	-3.62282	-1.18895	-0.517107	-1.511	-1.29625	-2.06885	-0.74164
	CL316,243 treatment	0.298348	-1.47756	0.109478	-0.565918	1.16529	1.53211	-0.0839035	0.199458	1.83711	-0.35992	0.132499	-0.588956	-0.0652092	-2.40826	0.673015	0.846681	0.43035	-0.114196	-1.377	0.557427	1.39076	1.3727	1.26433	0.511751	-0.0903092	1.11983	0.325113	-2.34804	1.80016		2.43834	1.07167		2.52263	1.75199	-1.91457	2.78453	2.25772	-2.01692		1.07167	0.159546	1.80919	1.57439	-2.74836	-2.92591	0.990389	0.866966
		0.166914	-1.7361	0.264534	-0.0749283	1.58766	0.934114	0.231457	-0.0820233	1.35124	-0.362346	0.629276	-0.153807	0.217165	-1.93797	0.555924	1.42026	-0.0843971	0.404582	-1.26268	0.210396	1.21917	1.29443	1.2282	0.565936	-0.590018		-0.0933192	-1.49611	1.39979		2.63401	1.26433	-2.14636	2.66111	1.20713		2.85677	2.24869		-1.95971	0.373276	-0.719463	1.89047	0.132452	-2.16743	-5.00612	0.689359	0.361237
		-0.169126	-2.89276	-0.0818311	-0.523125	-0.129554	-0.923098	-0.571869	-0.621948	0.691532	-1.1969	-1.072	-0.629685	-1.15428	-2.6172	1.23555	0.113079	-0.584613	-0.753407	-1.93052	0.488717	1.30647	1.15897	0.948244	0.463585	0.0541839	1.07468	-2.52564	-2.14333	1.67072	-4.10292	2.20053	0.945234	-2.85667	2.3962	1.18004	-2.27581	2.56478	2.10119	-3.11577	-2.30592	1.27637	-0.147505	1.47505	1.97175	-1.74297	-2.06505	0.888038	-0.445524
																						1.39678	1.18606	0.761606	0.490679	0.108372	1.09575	-0.406391	-2.17341	1.89047	-4.25337	2.01088	0.821812	-2.0139	1.93562	1.21315		2.61294	2.17645	-3.19382	-2.44141	1.47505	0.291999	1.42989	2.09517	-2.95001	-2.75746	0.620121	-0.367256
[truncated: 19 more columns]
