# Supplementary material for: Identification and characterization of distinct brown adipocyte subtypes in C57BL/6J mice
Source: Life Sci Alliance. 2020 Nov 30;4(1):e202000924. doi: 10.26508/lsa.202000924 (PMC7723269; doi:10.26508/lsa.202000924)
Supplement: Supplementary file 10 [file LSA-2020-00924_SdataFS2.xlsx]

## Sheet: FigureS2A
	Brown	Beige	White
Pparg	2.18859	1.94531	0.463294
	2.28153	2.36198	0.712025
	2.32947	2.58471	0.429283
		3.45815	0.790041
Prdm16	0.075363	0.0328036	0.0279695
	0.108067	0.0231957	0.0277763
	0.073812	0.034674	0.047039
		0.0316862	0.0231957
Ppargc1a	0.0319066	0.139661	0.0532897
	0.0325771	0.188156	0.0638133
	0.0279695	0.144586	0.0392817
		0.184284	0.0529216
Ucp1	0.00916277	0.0136023	9.2512e-05
	0.00982042	0.00903663	8.51284e-05
	0.0055627	0.00412898	7.8879e-05
		0.0107464	0.000104081
P2rx5	0.059954	0.0297699	0.0363979
	0.0717937	0.0356489	0.0260965
	0.0698305	0.0319066	0.0248605
		0.0401071	0.0203335
Pat2	0.858565	0.423373	0.15932
	0.659754	0.586418	0.228458
	0.882703	0.692555	0.124137
		0.846745	0.281265
Cd137	0.00630189	0.0679209	0.0412346
	0.00860863	0.0540336	0.0287559
	0.0109722	0.0473661	0.0390103
		0.0547879	0.0379436
Tmem26	0.0423939	0.0103087	0.00961832
	0.0303955	0.00854917	0.013139
	0.0412346	0.0135084	0.0195052
		0.0114382	0.0094859

## Sheet: FigureS2B
	BAT1																				BAT2																						BAT3
	A2	A3	A5	A6	B1	B3	B4	B5	B6	C2	C3	C4	C5	C6	D1	D2	D3	D4	D5	D6	A1	A3	A7	A10	A11	A12	B4	B5	B6	B10	B11	C1	C6	C7	C8	C9	C12	D2	D6	D10	D11	D12	A3	B1	B3	B4	B6	B7	B8
Adiponectin		79.3413		58.4852	100.427	42.5179	64	97.0059	61.8199	60.1295	62.2499		44.0173	0.281265	118.603	37.2715	131.599	163.144	17.5087	141.044	196.72	121.938	199.466	195.361	95.0095	157.587	0.25349	261.379	265.028	0.0507658	139.102	268.728	232.325	0.0865693	202.251	126.238	0.384219	184.823	235.568	144.007	148.056	0.0547879	5.46416	93.7015	177.294	62.2499	49.18	352.139	280.139
	112.206	67.1819	98.36	127.116	288.015	104.692	119.428	72.0037	36.0019	114.563	64	56.1028	75.5835	1.18921	112.986	90.5097	53.0765	105.42	14.723	96.3358	183.546	172.446	86.2229		266.871	210.839	33.3589	328.557	176.069	16.1113	209.383	195.361	183.546	0.0354026	219.793	101.829	0.000112328	111.43	17.6305	174.853	95.0095	0.00203607	64.8934	29.6508	54.5686	38.5859	14.9285	106.153	92.4115
	99.7331	16.6794	96.3358	47.8352	147.033	13.0864	118.603	38.0546	96.3358	30.6964	21.5557	92.4115	3.78423	0.0500669	144.007	95.6703	104.692	105.42	1.7411	122.786	200.853	210.839	128.89	199.466	212.306	196.72		182.278		0.15283	194.012		182.278	0.0429857	172.446	152.219	0.97942	199.466	294.067	177.294	183.546		140.07	26.1729	64.8934	27.0958	33.5909	57.68	70.0348
Cd36		13.4543		19.1597	38.0546	24.084	32.6724	35.7532	37.5307	22.6274	25.4572		24.084	0.114229	49.5221	18.0009	72.0037	25.6342	6.63456	48.8403	81.0084	45.5696	25.2813	62.2499	60.5477	96.3358	0.210224	85.0359	27.4741	0.0620683	75.0614	38.8542	98.36	0.018199	91.7731	60.5477	0.0785633	65.7993	39.3966	46.5271	60.9688	1.24969e-06	4.14106	41.6429	68.1197	29.2426	20.8215	50.5626	79.8932
	32.2226	17.0299	54.5686	38.3193	61.3929	29.8571	48.1679	73.0089	36.5044	37.2715	23.2636	44.3235	25.4572	0.386891	36.7584	25.4572	42.8137	16.1113	2.39496	88.0347	35.0174	47.5048	4.37718		89.2636	90.5097	5.9859e-06	78.249	17.1484		61.3929	20.9663	89.8845	0.000465155	78.249	39.9466	2.53427e-06	29.2426	1.29235	35.261	47.8352	1.90735e-06	26.7228	16	17.1484	21.7057	6.58873	73.0089	38.3193
	36.0019	4.72397	33.1285	22.1618	41.0696	8.28212	43.7133	26.5382	42.2243	12.8171	7.88986	49.5221	1.98619	0.0191037	48.5029	36.2523	61.3929	9.31787	1.09429	26.3549	93.0542	100.427	22.9433	93.0542	114.563	134.364		96.3358		0.040386	92.4115		146.018	0.00786684	94.3532	88.0347	0.198884	86.2229	51.2685	58.0812	82.7106		42.8137	9.91766	9.71356	10.1965	3.91768	14.8254	14.6213
Fabp4 (log)		-2.35405		-2.48952	-2.69422	-2.58886	-2.51661	-2.62799	-2.79055	-2.30589	-2.3661		-2.12828	0.207711	-2.63401	-2.21257	-2.63702	-2.48049	-1.75802	-2.57682	-2.62498	-2.45339	-2.23063	-2.76345	-2.59789	-2.72432	0.0662268	-2.76044	-2.34502	0.225772	-2.61595	-2.30288	-2.41125	0.50573	-2.58284	-2.66713	0.234803	-2.61294	-2.50758	-2.72733	-2.70024	0.936203	-1.36668	-2.5437	-2.69723	-2.24267	-2.41125	-2.43533	-2.66111
	-2.93203	-2.1343	-2.73636	-2.73034	-3.01331	-2.76044	-2.65809	-2.65509	-2.78754	-2.67917	-2.48049	-2.64003	-2.55273	-0.797729	-2.82667	-2.65207	-2.66411	-2.6009	-1.80317	-3.00127	-2.70626	-2.42931	-1.83026		-2.71228	-2.62498	0.0120413	-2.58886	-1.83026	0.276948	-2.5136	-2.22762	-2.60692	0.50573	-2.77851	-2.70024	0.69839	-2.38416	-1.60148	-2.95912	-2.90193	0.686348	-2.56478	-2.20956	-2.41426	-2.23364	-2.13129	-2.41125	-2.39921
	-2.61896	-1.55332	-2.54069	-2.32696	-2.80861	-1.95971	-2.71228	-2.2788	-2.72432	-1.87241	-1.71286	-2.45038	-1.12284	0.577978	-2.66411	-2.37814	-2.63702	-2.16441	-0.716451	-2.48952	-2.68218	-2.76948	-2.19451	-2.8628	-2.85677	-2.8929		-2.64605		0.0993398	-2.86581		-2.64906	0.517772	-2.59789	-2.84774	-0.346185	-2.55876	-2.43533	-2.82667	-2.98622		-2.49855	-1.91455	-2.40222	-1.99884	-2.14333	-1.96271	-2.25773
Fasn		0.0170983		0.0665231	0.0150928	0.0217929	0.0476956	0.0536603	0.0337259	0.0321286	0.0281641		0.03983	0.386891	0.0139848	0.0415214	0.0349152	0.0230355	0.0693481	0.034674	0.00442533	0.00347204	0.0134151	0.00293993	0.00625836	0.0041577	0.121582	0.00237147	0.003545	0.11908	0.00393342	0.013697	0.00393342	0.104386	0.0026866	0.00694408	0.0511189	0.00398833	0.00264962	0.00897421	0.0128686	0.07966	0.017337	0.00511872	0.00808801	0.00995751	0.0248605	0.00484261	0.0137922
	0.0934281	0.03983	0.180491	0.0733022	0.0191037	0.0279695	0.0361465	0.170755	0.438303	0.0330318	0.0241807	0.0853775	0.0195052	0.360982	0.0423939	0.0337259	0.0204749	0.015625	0.0647041	0.303549	0.00412898	0.00407213	0.0228763		0.00283979	0.00317286	0.0927827	0.00198039	0.00808801	0.114229	0.00347204	0.01418	0.00515433	0.124137	0.00229069	0.00494436	0.0908733	0.00638986	0.0441942	0.00797666	0.0128686	0.0733022	0.00579892	0.0211969	0.052193	0.0316862	0.255253	0.00849012	0.0279695
	0.0674518	0.143587	0.140632	0.101532	0.0246888	0.072293	0.0374212	0.105843	0.0563282	0.0865693	0.173139	0.0451228	0.248273	0.343886	0.0250334	0.0504151	0.0332616	0.0483614	0.287175	0.0647041	0.00282017	0.00247218	0.0185814	0.0033076	0.00342424	0.00274306		0.00285954		0.130308	0.0024551		0.00477594	0.110338	0.00195312	0.00474295	0.076415	0.00349619	0.00352051	0.0115978	0.00942037		0.00544822	0.0366511	0.029977	0.0349152	0.02836	0.0200535	0.0483614
Glut4		6.36429		2.90794	10.3388	11.8762	4.53154	6.32033	12.295	5.31474	4.65893		3.36359	0.186856	11.7127	3.24901	7.88986	8.51496	1.82766	9.25351	32	31.779	6.86852	46.2057	30.2738	35.261	0.19751	40.7859	12.2101	0.180491	32.4467	5.6962	44.3235	0.0748424	44.3235	30.91	0.145592	33.1285	27.0958	21.5557	26.5382	0.0358968	2.26577	12.8171	19.1597	8	7.1602	10.5561	13.3614
	7.31065	4.25748	8.11168	9.12611	15.5625	17.1484	8.05564	12.6407	4.11245	8.63383	5.38893	10.9283	6.63456	0.289172	9.51366	6.27667	7.88986	7.4127	2.08493	6.96441	27.4741	13.9288	0.895025		41.3553	31.3414	0.166086	31.5594	4.34694	0.356013	22.0087	4.40762	24.084	0.0532897	28.443	17.6305	0.052193	7.6211	0.496546	15.1369	17.2676	1.90735e-06	18.1261	6.63456	11.0043	6.02099	3.97237	15.8895	11.6318
	7.51618	0.840896	6.06287	5.09824	12.996	7.31065	7.83536	7.4127	11.0809	1.89211	0.946058	8.33973	0.323088	0.148651	9.00047	4.75683	9.51366	6.54322	0.329877	8.45614	26.7228	30.91	4.34694	33.1285	39.9466	42.2243		28.84		0.0871715	34.5353		33.1285	0.0480274	31.5594	31.779	0.219151	24.761	16.4498	15.2422	32.6724		24.59	5.06303	11.0043	4.05584	3.18215	6.40856	5.50217
Hsl		0.389582		0.742262	1.82766	1.13288	0.742262	0.646176	1.67018	0.702222	0.888843		0.496546	0.0130483	2.28153	0.50698	0.907519	1.72907	0.246558	0.795536	1.93187	2.88786	2.05623	5.38893	4.43828	2.41162	0.0308198	5.77572	0.933033	0.014082	1.6358	1.91853	6.63456	0.0149885	6.9163	3.89062	0.00154305	5.77572	1.69349	4.22807	4.99332	0.00666121	0.143587	2.86791	3.5801	1.94531	2.71321	2.31338	1.84038
	1.42405	0.493116	1.31951	1.8025	3.41054	2.44528	1.3566	1.94531	1.08674	1.47427	0.817902	1.33793	0.790041	0.0222508	1.98619	0.965936	0.840896	1.23114	0.25	2.78949	2.54912	1.42405	0.356013		8.28212	2.62079	5.9859e-06	5.38893	0.246558	0.0112807	1.65864	1.41421	5.06303	0.0105253	4.82323	2.56685	2.53427e-06	0.479632	0.0210505	4.65893	4.56306	0.014082	1.25701	0.97942	4.02782	2.42839	0.747425	0.63728	4.89056
	1.33793	0.223756	1.40444	1.21419	4.40762	0.721965	2.39496	1.60214	2.86791	0.514057	0.366021	0.972655	0.0953912	0.0188407	3.13834	1.98619	2.32947	1.11729	0.0206173	2.07053	1.77768	3.13834	1.70527	7.94474	9.64646	3.18215		6.54322		0.0203335	2.15846		7.94474	0.0155171	4.78991	3.73213	0.0195052	4.43828	0.933033	4.78991	6.27667		3.41054	1.60214	3.38698	2.65737	1.53687	1.32869	2.65737
[truncated: 15 more columns]
