# Supplementary material for: Identification and characterization of distinct brown adipocyte subtypes in C57BL/6J mice
Source: Life Sci Alliance. 2020 Nov 30;4(1):e202000924. doi: 10.26508/lsa.202000924 (PMC7723269; doi:10.26508/lsa.202000924)
Supplement: Supplementary file 13 [file LSA-2020-00924_SdataF5.xlsx]

## Sheet: Figure5C
	Sample	GAR0845	GAR0846	GAR0848	GAR0849	GAR0850	GAR0852	GAR0853	GAR0854	GAR0855	GAR0857	GAR0858	GAR0859	GAR0860	GAR0861	GAR0862	GAR0863	GAR0864	GAR0865	GAR0866	GAR0867
	Clones	A2	A3	A5	A6	B1	B3	B4	B5	B6	C2	C3	C4	C5	C6	D1	D2	D3	D4	D5	D6
Preadipocytes	BAT	0.965216	0.254038	0.970833	0.918762	0.196634	0.0890248	0.269752	0.913903	0.960057	0.246507	0.296079	0.237668	0.317468	0.464965	0.1169	0.0189957	0.782664	0.968031	0.655982	0.0948793
	WAT	0.0347837	0.745962	0.0291668	0.0812377	0.803366	0.910975	0.730248	0.0860969	0.0399431	0.753493	0.703921	0.762332	0.682532	0.535035	0.8831	0.981004	0.217336	0.031969	0.344018	0.905121
Adipocytes	BAT	0.964827	0.0119599	0.943477	0.541836	0.852293	0.985539	0.425094	0.650254	0.986935	0.0154054	0.14125	0.792416	0.0158736	0.0114656	0.156938	0.496899	0.546958	0.834009	0.0124335	0.980346
	WAT	0.0351728	0.98804	0.0565228	0.458164	0.147707	0.0144607	0.574906	0.349746	0.0130654	0.984595	0.85875	0.207584	0.984126	0.988534	0.843062	0.503101	0.453042	0.165991	0.987566	0.0196544
