# Supplementary material for: Identification and characterization of distinct brown adipocyte subtypes in C57BL/6J mice
Source: Life Sci Alliance. 2020 Nov 30;4(1):e202000924. doi: 10.26508/lsa.202000924 (PMC7723269; doi:10.26508/lsa.202000924)
Supplement: Supplementary file 14 [file LSA-2020-00924_TableS3.xlsx]

## Sheet: KEGG_module_1
pv	pv_fdr	term	Brite1	Brite2	kegg_name	hits	BG	Symbols
0.000449395	0.113434	path:mmu04071	Environmental Information Processing	Signal transduction	Sphingolipid signaling pathway	6	67	Akt1,Ppp2r5c,Ppp2r5e,Rock2,Sgpp1,Sptlc2
0.000819847	0.113434	path:mmu03015	Genetic Information Processing	Translation	mRNA surveillance pathway	5	50	Cpsf2,Cpsf3,Papola,Ppp2r5c,Ppp2r5e
0.00107351	0.113434	path:mmu04330	Environmental Information Processing	Signal transduction	Notch signaling pathway	4	31	Adam17,Numb,Psen1,Snw1
0.0062528	0.495534	path:mmu04140	Cellular Processes	Transport and catabolism	Autophagy - animal	5	81	Akt1,Atg2b,Eif2s1,Hif1a,Zfyve1
0.0119295	0.570446	path:mmu03050	Genetic Information Processing	Folding, sorting and degradation	Proteasome	3	33	Psma3,Psma6,Psmc1
0.0125966	0.570446	path:mmu04114	Cellular Processes	Cell growth and death	Oocyte meiosis	4	63	Calm1,Ppp2r5c,Ppp2r5e,Ywhaq
0.0125966	0.570446	path:mmu04728	Organismal Systems	Nervous system	Dopaminergic synapse	4	63	Akt1,Calm1,Ppp2r5c,Ppp2r5e
0.0159794	0.571028	path:mmu00240	Metabolism	Nucleotide metabolism	Pyrimidine metabolism	4	68	Entpd5,Pole2,Rrm2,Twistnb
0.0167105	0.571028	path:mmu04261	Organismal Systems	Circulatory system	Adrenergic signaling in cardiomyocytes	4	69	Akt1,Calm1,Ppp2r5c,Ppp2r5e
0.0181856	0.571028	path:mmu00230	Metabolism	Nucleotide metabolism	Purine metabolism	5	108	Entpd5,Pole2,Prps1l3,Rrm2,Twistnb
0.0198149	0.571028	path:mmu04722	Organismal Systems	Nervous system	Neurotrophin signaling pathway	4	73	Akt1,Calm1,Kidins220,Psen1
0.023761	0.604832	path:mmu05165	Human Diseases	Infectious diseases	Human papillomavirus infection	7	205	Akt1,Lamb1,Mpp5,Ppp2r5c,Ppp2r5e,Psen1,Psmc1
0.0249997	0.604832	path:mmu04152	Environmental Information Processing	Signal transduction	AMPK signaling pathway	4	79	Akt1,Ppp2r5c,Ppp2r5e,Rab10
0.0267118	0.604832	path:mmu01100	Mus Musculus	Metabolic pathways	Metabolic pathways	16	691	Acadl,Acp1,Atp6v1d,Coq6,Dld,Dlst,Fut8,Mgat2,Mthfd1,Nampt,Pole2,Prps1l3,Rdh11,Rrm2,Sptlc2,Twistnb
0.0331537	0.632474	path:mmu00020	Metabolism	Carbohydrate metabolism	Citrate cycle (TCA cycle)	2	20	Dld,Dlst
0.034421	0.632474	path:mmu04510	Cellular Processes	Cellular community - eukaryotes	Focal adhesion	5	131	Actn1,Akt1,Arhgap5,Lamb1,Rock2
0.0363055	0.632474	path:mmu04666	Organismal Systems	Immune system	Fc gamma R-mediated phagocytosis	3	52	Akt1,Arf6,Cfl2
0.0363055	0.632474	path:mmu04670	Organismal Systems	Immune system	Leukocyte transendothelial migration	3	52	Actn1,Arhgap5,Rock2
0.0379085	0.632474	path:mmu04915	Organismal Systems	Endocrine system	Estrogen signaling pathway	3	53	Akt1,Calm1,Hsp90aa1
0.0453333	0.654694	path:mmu03420	Genetic Information Processing	Replication and repair	Nucleotide excision repair	2	24	Mnat1,Pole2
0.0485357	0.654694	path:mmu00600	Metabolism	Lipid metabolism	Sphingolipid metabolism	2	25	Sgpp1,Sptlc2
0.0517909	0.654694	path:mmu04612	Organismal Systems	Immune system	Antigen processing and presentation	2	26	Hsp90aa1,Lgmn
0.0553636	0.654694	path:mmu04151	Environmental Information Processing	Signal transduction	PI3K-Akt signaling pathway	6	205	Akt1,Hsp90aa1,Lamb1,Ppp2r5c,Ppp2r5e,Ywhaq
0.0584413	0.654694	path:mmu00310	Metabolism	Amino acid metabolism	Lysine degradation	2	28	Dlst,Setd3
0.0589825	0.654694	path:mmu05203	Human Diseases	Cancers	Viral carcinogenesis	4	109	Actn1,Psmc1,Snw1,Ywhaq
0.0602941	0.654694	path:mmu04141	Genetic Information Processing	Folding, sorting and degradation	Protein processing in endoplasmic reticulum	4	110	Eif2s1,Hsp90aa1,Sec23a,Sel1l
0.0608716	0.654694	path:mmu05222	Human Diseases	Cancers	Small cell lung cancer	3	66	Akt1,Lamb1,Max
0.0618276	0.654694	path:mmu00510	Metabolism	Glycan biosynthesis and metabolism	N-Glycan biosynthesis	2	29	Fut8,Mgat2
0.0618276	0.654694	path:mmu05133	Human Diseases	Infectious diseases	Pertussis	2	29	Calm1,Cfl2
0.0646846	0.654694	path:mmu01200	Mus Musculus	Metabolic pathways	Carbon metabolism	3	68	Dld,Dlst,Prps1l3
0.071447	0.654694	path:mmu00740	Metabolism	Metabolism of cofactors and vitamins	Riboflavin metabolism	1	5	Acp1
0.071447	0.654694	path:mmu04744	Organismal Systems	Sensory system	Phototransduction	1	5	Calm1
0.0765677	0.654694	path:mmu05169	Human Diseases	Infectious diseases	Epstein-Barr virus infection	4	122	Akt1,Psmc1,Snw1,Ywhaq
0.0886872	0.654694	path:mmu05200	Human Diseases	Cancers	Pathways in cancer	6	244	Akt1,Hif1a,Hsp90aa1,Lamb1,Max,Rock2
0.104124	0.654694	path:mmu05132	Human Diseases	Infectious diseases	Salmonella infection	2	41	Klc1,Rock2
0.104124	0.654694	path:mmu05230	Human Diseases	Cancers	Central carbon metabolism in cancer	2	41	Akt1,Hif1a
0.104707	0.654694	path:mmu04022	Environmental Information Processing	Signal transduction	cGMP-PKG signaling pathway	3	88	Akt1,Calm1,Rock2
0.108756	0.654694	path:mmu04024	Environmental Information Processing	Signal transduction	cAMP signaling pathway	3	90	Akt1,Calm1,Rock2
0.108756	0.654694	path:mmu05418	Human Diseases	Cardiovascular diseases	Fluid shear stress and atherosclerosis	3	90	Akt1,Calm1,Hsp90aa1
0.110776	0.654694	path:mmu04390	Environmental Information Processing	Signal transduction	Hippo signaling pathway	3	91	Frmd6,Mpp5,Ywhaq
0.110776	0.654694	path:mmu04530	Cellular Processes	Cellular community - eukaryotes	Tight junction	3	91	Actn1,Mpp5,Rock2
0.1148	0.654694	path:mmu03013	Genetic Information Processing	Translation	RNA transport	3	93	Eif2b2,Eif2s1,Eif5
0.121016	0.654694	path:mmu00130	Metabolism	Metabolism of cofactors and vitamins	Ubiquinone and other terpenoid-quinone biosynthesis	1	9	Coq6
0.121833	0.654694	path:mmu05211	Human Diseases	Cancers	Renal cell carcinoma	2	46	Akt1,Hif1a
0.121833	0.654694	path:mmu05214	Human Diseases	Cancers	Glioma	2	46	Akt1,Calm1
0.12475	0.654694	path:mmu05010	Human Diseases	Neurodegenerative diseases	Alzheimer's disease	3	98	Adam17,Calm1,Psen1
0.132275	0.654694	path:mmu04922	Organismal Systems	Endocrine system	Glucagon signaling pathway	2	49	Akt1,Calm1
0.132433	0.654694	path:mmu00533	Metabolism	Glycan biosynthesis and metabolism	Glycosaminoglycan biosynthesis - keratan sulfate	1	10	Fut8
0.132433	0.654694	path:mmu00730	Metabolism	Metabolism of cofactors and vitamins	Thiamine metabolism	1	10	Acp1
0.134478	0.654694	path:mmu05167	Human Diseases	Infectious diseases	Kaposi's sarcoma-associated herpesvirus infection	3	103	Akt1,Calm1,Hif1a
0.142512	0.654694	path:mmu04914	Organismal Systems	Endocrine system	Progesterone-mediated oocyte maturation	2	52	Akt1,Hsp90aa1
0.143477	0.654694	path:mmu04966	Organismal Systems	Excretory system	Collecting duct acid secretion	1	11	Atp6v1d
0.145871	0.654694	path:mmu04520	Cellular Processes	Cellular community - eukaryotes	Adherens junction	2	53	Acp1,Actn1
0.1492	0.654694	path:mmu05146	Human Diseases	Infectious diseases	Amoebiasis	2	54	Actn1,Lamb1
0.155765	0.654694	path:mmu04659	Organismal Systems	Immune system	Th17 cell differentiation	2	56	Hif1a,Hsp90aa1
0.164482	0.654694	path:mmu00670	Metabolism	Metabolism of cofactors and vitamins	One carbon pool by folate	1	13	Mthfd1
0.164482	0.654694	path:mmu00760	Metabolism	Metabolism of cofactors and vitamins	Nicotinate and nicotinamide metabolism	1	13	Nampt
0.165357	0.654694	path:mmu04270	Organismal Systems	Circulatory system	Vascular smooth muscle contraction	2	59	Calm1,Rock2
0.169922	0.654694	path:mmu04810	Cellular Processes	Cell motility	Regulation of actin cytoskeleton	3	123	Actn1,Cfl2,Rock2
0.171567	0.654694	path:mmu05231	Human Diseases	Cancers	Choline metabolism in cancer	2	61	Akt1,Hif1a
0.174614	0.654694	path:mmu05145	Human Diseases	Infectious diseases	Toxoplasmosis	2	62	Akt1,Lamb1
0.177621	0.654694	path:mmu04611	Organismal Systems	Immune system	Platelet activation	2	63	Akt1,Rock2
0.180587	0.654694	path:mmu03040	Genetic Information Processing	Transcription	Spliceosome	2	64	Rbm25,Snw1
0.180627	0.654694	path:mmu04014	Environmental Information Processing	Signal transduction	Ras signaling pathway	3	130	Akt1,Arf6,Calm1
0.184098	0.654694	path:mmu00030	Metabolism	Carbohydrate metabolism	Pentose phosphate pathway	1	15	Prps1l3
0.184098	0.654694	path:mmu00830	Metabolism	Metabolism of cofactors and vitamins	Retinol metabolism	1	15	Rdh11
0.184098	0.654694	path:mmu00900	Metabolism	Metabolism of terpenoids and polyketides	Terpenoid backbone biosynthesis	1	15	Fntb
0.184098	0.654694	path:mmu04136	Cellular Processes	Transport and catabolism	Autophagy - other	1	15	Atg2b
0.18923	0.654694	path:mmu05215	Human Diseases	Cancers	Prostate cancer	2	67	Akt1,Hsp90aa1
0.194116	0.654694	path:mmu05205	Human Diseases	Cancers	Proteoglycans in cancer	3	140	Akt1,Hif1a,Rock2
0.194774	0.654694	path:mmu05160	Human Diseases	Infectious diseases	Hepatitis C	2	69	Akt1,Eif2s1
0.194774	0.654694	path:mmu05162	Human Diseases	Infectious diseases	Measles	2	69	Akt1,Eif2s1
0.197478	0.654694	path:mmu04066	Environmental Information Processing	Signal transduction	HIF-1 signaling pathway	2	70	Akt1,Hif1a
0.20239	0.654694	path:mmu00630	Metabolism	Carbohydrate metabolism	Glyoxylate and dicarboxylate metabolism	1	17	Dld
0.20239	0.654694	path:mmu04392	Environmental Information Processing	Signal transduction	Hippo signaling pathway - multiple species	1	17	Frmd6
0.20239	0.654694	path:mmu04973	Organismal Systems	Digestive system	Carbohydrate digestion and absorption	1	17	Akt1
0.211058	0.654694	path:mmu04740	Organismal Systems	Sensory system	Olfactory transduction	1	18	Calm1
0.211849	0.654694	path:mmu04144	Cellular Processes	Transport and catabolism	Endocytosis	3	157	Arf6,Rab10,Snx6
0.212729	0.654694	path:mmu04921	Organismal Systems	Endocrine system	Oxytocin signaling pathway	2	76	Calm1,Rock2
0.215105	0.654694	path:mmu04371	Environmental Information Processing	Signal transduction	Apelin signaling pathway	2	77	Akt1,Calm1
0.217433	0.654694	path:mmu05152	Human Diseases	Infectious diseases	Tuberculosis	2	78	Akt1,Calm1
0.219417	0.654694	path:mmu00640	Metabolism	Carbohydrate metabolism	Propanoate metabolism	1	19	Dld
0.219417	0.654694	path:mmu03410	Genetic Information Processing	Replication and repair	Base excision repair	1	19	Pole2
0.221944	0.654694	path:mmu04919	Organismal Systems	Endocrine system	Thyroid hormone signaling pathway	2	80	Akt1,Hif1a
0.224126	0.654694	path:mmu04072	Environmental Information Processing	Signal transduction	Phospholipase D signaling pathway	2	81	Akt1,Arf6
0.227195	0.654694	path:mmu04010	Environmental Information Processing	Signal transduction	MAPK signaling pathway	3	187	Akt1,Max,Ppm1a
0.227476	0.654694	path:mmu03022	Genetic Information Processing	Transcription	Basal transcription factors	1	20	Mnat1
0.228344	0.654694	path:mmu05164	Human Diseases	Infectious diseases	Influenza A	2	83	Akt1,Eif2s1
0.235628	0.654694	path:mmu03010	Genetic Information Processing	Translation	Ribosome	0	94
0.236194	0.654694	path:mmu04210	Cellular Processes	Cell growth and death	Apoptosis	2	87	Akt1,Eif2s1
0.236194	0.654694	path:mmu04621	Organismal Systems	Immune system	NOD-like receptor signaling pathway	2	87	Hsp90aa1,Nampt
0.238034	0.654694	path:mmu04062	Organismal Systems	Immune system	Chemokine signaling pathway	2	88	Akt1,Rock2
0.238034	0.654694	path:mmu04142	Cellular Processes	Transport and catabolism	Lysosome	2	88	Laptm4a,Lgmn
0.238034	0.654694	path:mmu04910	Organismal Systems	Endocrine system	Insulin signaling pathway	2	88	Akt1,Calm1
0.239826	0.654694	path:mmu05161	Human Diseases	Infectious diseases	Hepatitis B	2	89	Akt1,Ywhaq
0.242717	0.654694	path:mmu03030	Genetic Information Processing	Replication and repair	DNA replication	1	22	Pole2
0.248057	0.654694	path:mmu04310	Environmental Information Processing	Signal transduction	Wnt signaling pathway	2	94	Psen1,Rock2
0.24956	0.654694	path:mmu04932	Human Diseases	Endocrine and metabolic diseases	Non-alcoholic fatty liver disease (NAFLD)	2	95	Akt1,Eif2s1
0.249915	0.654694	path:mmu00260	Metabolism	Amino acid metabolism	Glycine, serine and threonine metabolism	1	23	Dld
0.249915	0.654694	path:mmu00620	Metabolism	Carbohydrate metabolism	Pyruvate metabolism	1	23	Dld
0.252422	0.654694	path:mmu04150	Environmental Information Processing	Signal transduction	mTOR signaling pathway	2	97	Akt1,Atp6v1d
0.256363	0.654694	path:mmu05202	Human Diseases	Cancers	Transcriptional misregulation in cancer	2	100	Fut8,Max
0.256838	0.654694	path:mmu03020	Genetic Information Processing	Transcription	RNA polymerase	1	24	Twistnb
0.256838	0.654694	path:mmu03460	Genetic Information Processing	Replication and repair	Fanconi anemia pathway	1	24	Fancm
0.256838	0.654694	path:mmu05322	Human Diseases	Immune diseases	Systemic lupus erythematosus	1	24	Actn1
0.260973	0.654694	path:mmu04218	Cellular Processes	Cell growth and death	Cellular senescence	2	104	Akt1,Calm1
0.262539	0.654694	path:mmu04060	Environmental Information Processing	Signaling molecules and interaction	Cytokine-cytokine receptor interaction	0	87
0.263092	0.654694	path:mmu05166	Human Diseases	Infectious diseases	HTLV-I infection	2	160	Akt1,Pole2
0.269892	0.654694	path:mmu05031	Human Diseases	Substance dependence	Amphetamine addiction	1	26	Calm1
0.274366	0.654694	path:mmu04015	Environmental Information Processing	Signal transduction	Rap1 signaling pathway	2	127	Akt1,Calm1
0.274611	0.654694	path:mmu04360	Organismal Systems	Development	Axon guidance	2	133	Cfl2,Rock2
0.281929	0.654694	path:mmu04971	Organismal Systems	Digestive system	Gastric acid secretion	1	28	Calm1
0.287582	0.654694	path:mmu00071	Metabolism	Lipid metabolism	Fatty acid degradation	1	29	Acadl
0.287582	0.654694	path:mmu04721	Organismal Systems	Nervous system	Synaptic vesicle cycle	1	29	Atp6v1d
0.291134	0.654694	path:mmu05225	Human Diseases	Cancers	Hepatocellular carcinoma	1	122	Akt1
0.292998	0.654694	path:mmu00010	Metabolism	Carbohydrate metabolism	Glycolysis / Gluconeogenesis	1	30	Dld
0.292998	0.654694	path:mmu04664	Organismal Systems	Immune system	Fc epsilon RI signaling pathway	1	30	Akt1
0.292998	0.654694	path:mmu04924	Organismal Systems	Endocrine system	Renin secretion	1	30	Calm1
0.298185	0.654694	path:mmu04720	Organismal Systems	Nervous system	Long-term potentiation	1	31	Calm1
0.301667	0.654694	path:mmu04120	Genetic Information Processing	Folding, sorting and degradation	Ubiquitin mediated proteolysis	0	78
0.303147	0.654694	path:mmu00280	Metabolism	Amino acid metabolism	Valine, leucine and isoleucine degradation	1	32	Dld
0.31242	0.654694	path:mmu00970	Genetic Information Processing	Translation	Aminoacyl-tRNA biosynthesis	1	34	Wars
0.31242	0.654694	path:mmu04923	Organismal Systems	Endocrine system	Regulation of lipolysis in adipocytes	1	34	Akt1
0.31242	0.654694	path:mmu04970	Organismal Systems	Digestive system	Salivary secretion	1	34	Calm1
0.315956	0.654694	path:mmu05012	Human Diseases	Neurodegenerative diseases	Parkinson's disease	0	75
0.32086	0.654694	path:mmu00480	Metabolism	Metabolism of other amino acids	Glutathione metabolism	1	36	Rrm2
0.32086	0.654694	path:mmu01212	Mus Musculus	Metabolic pathways	Fatty acid metabolism	1	36	Acadl
0.32086	0.654694	path:mmu04370	Environmental Information Processing	Signal transduction	VEGF signaling pathway	1	36	Akt1
0.321598	0.654694	path:mmu05206	Human Diseases	Cancers	MicroRNAs in cancer	1	107	Dicer1
0.328509	0.654694	path:mmu05323	Human Diseases	Immune diseases	Rheumatoid arthritis	1	38	Atp6v1d
0.33205	0.654694	path:mmu04213	Organismal Systems	Aging	Longevity regulating pathway - multiple species	1	39	Akt1
0.33205	0.654694	path:mmu05213	Human Diseases	Cancers	Endometrial cancer	1	39	Akt1
0.335407	0.654694	path:mmu04662	Organismal Systems	Immune system	B cell receptor signaling pathway	1	40	Akt1
0.336058	0.654694	path:mmu04723	Organismal Systems	Nervous system	Retrograde endocannabinoid signaling	0	71
0.338586	0.654694	path:mmu03320	Organismal Systems	Endocrine system	PPAR signaling pathway	1	41	Acadl
0.338586	0.654694	path:mmu04657	Organismal Systems	Immune system	IL-17 signaling pathway	1	41	Hsp90aa1
0.338586	0.654694	path:mmu04920	Organismal Systems	Endocrine system	Adipocytokine signaling pathway	1	41	Akt1
0.338586	0.654694	path:mmu04925	Organismal Systems	Endocrine system	Aldosterone synthesis and secretion	1	41	Calm1
0.341591	0.654694	path:mmu04912	Organismal Systems	Endocrine system	GnRH signaling pathway	1	42	Calm1
0.341646	0.654694	path:mmu05016	Human Diseases	Neurodegenerative diseases	Huntington's disease	1	96	Rcor1
0.343316	0.654694	path:mmu05224	Human Diseases	Cancers	Breast cancer	1	95	Akt1
0.347098	0.654694	path:mmu04137	Cellular Processes	Transport and catabolism	Mitophagy - animal	1	44	Hif1a
0.349609	0.654694	path:mmu01230	Mus Musculus	Metabolic pathways	Biosynthesis of amino acids	1	45	Prps1l3
0.349609	0.654694	path:mmu04713	Organismal Systems	Environmental adaptation	Circadian entrainment	1	45	Calm1
0.349609	0.654694	path:mmu04750	Organismal Systems	Sensory system	Inflammatory mediator regulation of TRP channels	1	45	Calm1
0.349609	0.654694	path:mmu04917	Organismal Systems	Endocrine system	Prolactin signaling pathway	1	45	Akt1
0.349609	0.654694	path:mmu05218	Human Diseases	Cancers	Melanoma	1	45	Akt1
0.349609	0.654694	path:mmu05221	Human Diseases	Cancers	Acute myeloid leukemia	1	45	Akt1
0.351963	0.654694	path:mmu05223	Human Diseases	Cancers	Non-small cell lung cancer	1	46	Akt1
0.352649	0.654694	path:mmu05168	Human Diseases	Infectious diseases	Herpes simplex infection	1	89	Eif2s1
0.354076	0.654694	path:mmu04550	Cellular Processes	Cellular community - eukaryotes	Signaling pathways regulating pluripotency of stem cells	1	88	Akt1
0.355462	0.654694	path:mmu04068	Environmental Information Processing	Signal transduction	FoxO signaling pathway	1	87	Akt1
0.356219	0.654694	path:mmu04115	Cellular Processes	Cell growth and death	p53 signaling pathway	1	48	Rrm2
0.358129	0.654694	path:mmu04620	Organismal Systems	Immune system	Toll-like receptor signaling pathway	1	49	Akt1
0.359898	0.654694	path:mmu01524	Human Diseases	Drug resistance	Platinum drug resistance	1	50	Akt1
0.359898	0.654694	path:mmu04916	Organismal Systems	Endocrine system	Melanogenesis	1	50	Calm1
0.361531	0.654694	path:mmu04660	Organismal Systems	Immune system	T cell receptor signaling pathway	1	51	Akt1
0.363032	0.654694	path:mmu05142	Human Diseases	Infectious diseases	Chagas disease (American trypanosomiasis)	1	52	Akt1
0.363888	0.654694	path:mmu04926	Organismal Systems	Endocrine system	Relaxin signaling pathway	1	80	Akt1
0.364402	0.654694	path:mmu04512	Environmental Information Processing	Signaling molecules and interaction	ECM-receptor interaction	1	53	Lamb1
0.365648	0.654694	path:mmu05210	Human Diseases	Cancers	Colorectal cancer	1	54	Akt1
0.365831	0.654694	path:mmu04020	Environmental Information Processing	Signal transduction	Calcium signaling pathway	1	78	Calm1
0.366716	0.654694	path:mmu04110	Cellular Processes	Cell growth and death	Cell cycle	1	77	Ywhaq
0.366716	0.654694	path:mmu04217	Cellular Processes	Cell growth and death	Necroptosis	1	77	Hsp90aa1
0.366716	0.654694	path:mmu04630	Environmental Information Processing	Signal transduction	Jak-STAT signaling pathway	1	77	Akt1
0.367541	0.654694	path:mmu04668	Environmental Information Processing	Signal transduction	TNF signaling pathway	1	76	Akt1
0.367775	0.654694	path:mmu04211	Organismal Systems	Aging	Longevity regulating pathway	1	56	Akt1
0.367775	0.654694	path:mmu04725	Organismal Systems	Nervous system	Cholinergic synapse	1	56	Akt1
0.367775	0.654694	path:mmu05212	Human Diseases	Cancers	Pancreatic cancer	1	56	Akt1
0.369	0.654694	path:mmu00190	Metabolism	Energy metabolism	Oxidative phosphorylation	1	74	Atp6v1d
0.369441	0.654694	path:mmu04012	Environmental Information Processing	Signal transduction	ErbB signaling pathway	1	58	Akt1
0.370109	0.654694	path:mmu05034	Human Diseases	Substance dependence	Alcoholism	1	59	Calm1
0.370193	0.654694	path:mmu04145	Cellular Processes	Transport and catabolism	Phagosome	1	72	Atp6v1d
0.370193	0.654694	path:mmu04380	Organismal Systems	Development	Osteoclast differentiation	1	72	Akt1
0.370671	0.654694	path:mmu04070	Environmental Information Processing	Signal transduction	Phosphatidylinositol signaling system	1	60	Calm1
0.370671	0.654694	path:mmu05220	Human Diseases	Cancers	Chronic myeloid leukemia	1	60	Akt1
0.3711	0.654694	path:mmu04933	Human Diseases	Endocrine and metabolic diseases	AGE-RAGE signaling pathway in diabetic complications	1	70	Akt1
0.371441	0.654694	path:mmu04931	Human Diseases	Endocrine and metabolic diseases	Insulin resistance	1	69	Akt1
0.371488	0.654694	path:mmu01522	Human Diseases	Drug resistance	Endocrine resistance	1	62	Akt1
0.371751	0.654694	path:mmu01521	Human Diseases	Drug resistance	EGFR tyrosine kinase inhibitor resistance	1	63	Akt1
0.423416	0.737488	path:mmu04080	Environmental Information Processing	Signaling molecules and interaction	Neuroactive ligand-receptor interaction	0	56
0.423416	0.737488	path:mmu04350	Environmental Information Processing	Signal transduction	TGF-beta signaling pathway	0	56
0.429983	0.744835	path:mmu03018	Genetic Information Processing	Folding, sorting and degradation	RNA degradation	0	55
0.443423	0.763941	path:mmu03008	Genetic Information Processing	Translation	Ribosome biogenesis in eukaryotes	0	53
0.450299	0.767445	path:mmu04724	Organismal Systems	Nervous system	Glutamatergic synapse	0	52
0.450299	0.767445	path:mmu05414	Human Diseases	Cardiovascular diseases	Dilated cardiomyopathy (DCM)	0	52
0.45728	0.770707	path:mmu05100	Human Diseases	Infectious diseases	Bacterial invasion of epithelial cells	0	51
0.45728	0.770707	path:mmu05410	Human Diseases	Cardiovascular diseases	Hypertrophic cardiomyopathy (HCM)	0	51
0.464369	0.770707	path:mmu00564	Metabolism	Lipid metabolism	Glycerophospholipid metabolism	0	50
0.464369	0.770707	path:mmu04146	Cellular Processes	Transport and catabolism	Peroxisome	0	50
0.464369	0.770707	path:mmu04514	Environmental Information Processing	Signaling molecules and interaction	Cell adhesion molecules (CAMs)	0	50
0.471567	0.778577	path:mmu04064	Environmental Information Processing	Signal transduction	NF-kappa B signaling pathway	0	49
0.478876	0.786511	path:mmu04650	Organismal Systems	Immune system	Natural killer cell mediated cytotoxicity	0	48
0.486297	0.786511	path:mmu04540	Cellular Processes	Cellular community - eukaryotes	Gap junction	0	47
0.486297	0.786511	path:mmu04658	Organismal Systems	Immune system	Th1 and Th2 cell differentiation	0	47
0.486297	0.786511	path:mmu05412	Human Diseases	Cardiovascular diseases	Arrhythmogenic right ventricular cardiomyopathy (ARVC)	0	47
0.517141	0.827949	path:mmu04726	Organismal Systems	Nervous system	Serotonergic synapse	0	43
0.517141	0.827949	path:mmu05032	Human Diseases	Substance dependence	Morphine addiction	0	43
0.525151	0.832365	path:mmu04974	Organismal Systems	Digestive system	Protein digestion and absorption	0	42
0.525151	0.832365	path:mmu05217	Human Diseases	Cancers	Basal cell carcinoma	0	42
0.533284	0.836887	path:mmu00562	Metabolism	Carbohydrate metabolism	Inositol phosphate metabolism	0	41
0.533284	0.836887	path:mmu04727	Organismal Systems	Nervous system	GABAergic synapse	0	41
0.584778	0.913175	path:mmu04260	Organismal Systems	Circulatory system	Cardiac muscle contraction	0	35
0.593827	0.922761	path:mmu00520	Metabolism	Carbohydrate metabolism	Amino sugar and nucleotide sugar metabolism	0	34
0.603016	0.932469	path:mmu04911	Organismal Systems	Endocrine system	Insulin secretion	0	33
0.612346	0.933239	path:mmu00561	Metabolism	Lipid metabolism	Glycerolipid metabolism	0	32
0.612346	0.933239	path:mmu04340	Environmental Information Processing	Signal transduction	Hedgehog signaling pathway	0	32
0.612346	0.933239	path:mmu04640	Organismal Systems	Immune system	Hematopoietic cell lineage	0	32
0.621819	0.936691	path:mmu04623	Organismal Systems	Immune system	Cytosolic DNA-sensing pathway	0	31
0.631438	0.936691	path:mmu00330	Metabolism	Amino acid metabolism	Arginine and proline metabolism	0	30
0.631438	0.936691	path:mmu04622	Organismal Systems	Immune system	RIG-I-like receptor signaling pathway	0	30
0.631438	0.936691	path:mmu04730	Organismal Systems	Nervous system	Long-term depression	0	30
0.631438	0.936691	path:mmu04918	Organismal Systems	Endocrine system	Thyroid hormone synthesis	0	30
0.641205	0.936691	path:mmu04216	Cellular Processes	Cell growth and death	Ferroptosis	0	29
0.641205	0.936691	path:mmu04972	Organismal Systems	Digestive system	Pancreatic secretion	0	29
0.641205	0.936691	path:mmu05014	Human Diseases	Neurodegenerative diseases	Amyotrophic lateral sclerosis (ALS)	0	29
0.641205	0.936691	path:mmu05140	Human Diseases	Infectious diseases	Leishmaniasis	0	29
0.651122	0.946814	path:mmu05219	Human Diseases	Cancers	Bladder cancer	0	28
0.671414	0.947746	path:mmu04930	Human Diseases	Endocrine and metabolic diseases	Type II diabetes mellitus	0	26
0.671414	0.947746	path:mmu04976	Organismal Systems	Digestive system	Bile secretion	0	26
0.671414	0.947746	path:mmu05134	Human Diseases	Infectious diseases	Legionellosis	0	26
0.671414	0.947746	path:mmu05321	Human Diseases	Immune diseases	Inflammatory bowel disease (IBD)	0	26
0.681794	0.947746	path:mmu00270	Metabolism	Amino acid metabolism	Cysteine and methionine metabolism	0	25
0.681794	0.947746	path:mmu00980	Metabolism	Xenobiotics biodegradation and metabolism	Metabolism of xenobiotics by cytochrome P450	0	25
0.681794	0.947746	path:mmu02010	Environmental Information Processing	Membrane transport	ABC transporters	0	25
0.681794	0.947746	path:mmu05204	Human Diseases	Cancers	Chemical carcinogenesis	0	25
0.681794	0.947746	path:mmu05416	Human Diseases	Cardiovascular diseases	Viral myocarditis	0	25
0.703036	0.947746	path:mmu00250	Metabolism	Amino acid metabolism	Alanine, aspartate and glutamate metabolism	0	23
0.703036	0.947746	path:mmu03440	Genetic Information Processing	Replication and repair	Homologous recombination	0	23
0.703036	0.947746	path:mmu05216	Human Diseases	Cancers	Thyroid cancer	0	23
0.713902	0.947746	path:mmu00590	Metabolism	Lipid metabolism	Arachidonic acid metabolism	0	22
0.713902	0.947746	path:mmu04978	Organismal Systems	Digestive system	Mineral absorption	0	22
0.724934	0.947746	path:mmu00860	Metabolism	Metabolism of cofactors and vitamins	Porphyrin and chlorophyll metabolism	0	21
0.724934	0.947746	path:mmu01523	Human Diseases	Drug resistance	Antifolate resistance	0	21
0.724934	0.947746	path:mmu05030	Human Diseases	Substance dependence	Cocaine addiction	0	21
0.724934	0.947746	path:mmu05144	Human Diseases	Infectious diseases	Malaria	0	21
0.736136	0.947746	path:mmu00410	Metabolism	Metabolism of other amino acids	beta-Alanine metabolism	0	20
0.736136	0.947746	path:mmu00982	Metabolism	Xenobiotics biodegradation and metabolism	Drug metabolism - cytochrome P450	0	20
0.736136	0.947746	path:mmu04610	Organismal Systems	Immune system	Complement and coagulation cascades	0	20
0.736136	0.947746	path:mmu04960	Organismal Systems	Excretory system	Aldosterone-regulated sodium reabsorption	0	20
0.736136	0.947746	path:mmu04962	Organismal Systems	Excretory system	Vasopressin-regulated water reabsorption	0	20
0.74751	0.947746	path:mmu00052	Metabolism	Carbohydrate metabolism	Galactose metabolism	0	19
0.74751	0.947746	path:mmu00983	Metabolism	Xenobiotics biodegradation and metabolism	Drug metabolism - other enzymes	0	19
0.74751	0.947746	path:mmu04710	Organismal Systems	Environmental adaptation	Circadian rhythm	0	19
0.74751	0.947746	path:mmu04913	Organismal Systems	Endocrine system	Ovarian steroidogenesis	0	19
0.759058	0.947746	path:mmu04130	Genetic Information Processing	Folding, sorting and degradation	SNARE interactions in vesicular transport	0	18
0.759058	0.947746	path:mmu04215	Cellular Processes	Cell growth and death	Apoptosis - multiple species	0	18
0.759058	0.947746	path:mmu04961	Organismal Systems	Excretory system	Endocrine and other factor-regulated calcium reabsorption	0	18
0.770784	0.947746	path:mmu00051	Metabolism	Carbohydrate metabolism	Fructose and mannose metabolism	0	17
0.770784	0.947746	path:mmu00532	Metabolism	Glycan biosynthesis and metabolism	Glycosaminoglycan biosynthesis - chondroitin sulfate / dermatan sulfate	0	17
0.770784	0.947746	path:mmu00565	Metabolism	Lipid metabolism	Ether lipid metabolism	0	17
0.782689	0.947746	path:mmu00380	Metabolism	Amino acid metabolism	Tryptophan metabolism	0	16
0.782689	0.947746	path:mmu00500	Metabolism	Carbohydrate metabolism	Starch and sucrose metabolism	0	16
0.782689	0.947746	path:mmu00512	Metabolism	Glycan biosynthesis and metabolism	Mucin type O-glycan biosynthesis	0	16
0.782689	0.947746	path:mmu00563	Metabolism	Glycan biosynthesis and metabolism	Glycosylphosphatidylinositol (GPI)-anchor biosynthesis	0	16
0.782689	0.947746	path:mmu05020	Human Diseases	Neurodegenerative diseases	Prion diseases	0	16
0.794777	0.947746	path:mmu00534	Metabolism	Glycan biosynthesis and metabolism	Glycosaminoglycan biosynthesis - heparan sulfate / heparin	0	15
0.80705	0.947746	path:mmu00350	Metabolism	Amino acid metabolism	Tyrosine metabolism	0	14
0.80705	0.947746	path:mmu00531	Metabolism	Glycan biosynthesis and metabolism	Glycosaminoglycan degradation	0	14
0.80705	0.947746	path:mmu00601	Metabolism	Glycan biosynthesis and metabolism	Glycosphingolipid biosynthesis - lacto and neolacto series	0	14
0.80705	0.947746	path:mmu03060	Genetic Information Processing	Folding, sorting and degradation	Protein export	0	14
0.80705	0.947746	path:mmu04742	Organismal Systems	Sensory system	Taste transduction	0	14
0.819511	0.947746	path:mmu00100	Metabolism	Lipid metabolism	Steroid biosynthesis	0	13
0.819511	0.947746	path:mmu00511	Metabolism	Glycan biosynthesis and metabolism	Other glycan degradation	0	13
0.819511	0.947746	path:mmu01040	Metabolism	Lipid metabolism	Biosynthesis of unsaturated fatty acids	0	13
0.832164	0.947746	path:mmu00062	Metabolism	Lipid metabolism	Fatty acid elongation	0	12
0.832164	0.947746	path:mmu00514	Metabolism	Glycan biosynthesis and metabolism	Other types of O-glycan biosynthesis	0	12
0.832164	0.947746	path:mmu01210	Mus Musculus	Metabolic pathways	2-Oxocarboxylic acid metabolism	0	12
0.832164	0.947746	path:mmu04940	Human Diseases	Endocrine and metabolic diseases	Type I diabetes mellitus	0	12
0.84501	0.947746	path:mmu00040	Metabolism	Carbohydrate metabolism	Pentose and glucuronate interconversions	0	11
0.84501	0.947746	path:mmu00061	Metabolism	Lipid metabolism	Fatty acid biosynthesis	0	11
0.84501	0.947746	path:mmu00220	Metabolism	Amino acid metabolism	Arginine biosynthesis	0	11
0.84501	0.947746	path:mmu00340	Metabolism	Amino acid metabolism	Histidine metabolism	0	11
0.84501	0.947746	path:mmu00650	Metabolism	Carbohydrate metabolism	Butanoate metabolism	0	11
0.84501	0.947746	path:mmu04614	Organismal Systems	Endocrine system	Renin-angiotensin system	0	11
0.84501	0.947746	path:mmu04672	Organismal Systems	Immune system	Intestinal immune network for IgA production	0	11
0.84501	0.947746	path:mmu04975	Organismal Systems	Digestive system	Fat digestion and absorption	0	11
0.84501	0.947746	path:mmu05143	Human Diseases	Infectious diseases	African trypanosomiasis	0	11
0.84501	0.947746	path:mmu05340	Human Diseases	Immune diseases	Primary immunodeficiency	0	11
0.858054	0.947746	path:mmu00140	Metabolism	Lipid metabolism	Steroid hormone biosynthesis	0	10
0.858054	0.947746	path:mmu00515	Metabolism	Glycan biosynthesis and metabolism	Mannose type O-glycan biosynthesis	0	10
0.858054	0.947746	path:mmu00604	Metabolism	Glycan biosynthesis and metabolism	Glycosphingolipid biosynthesis - ganglio series	0	10
0.858054	0.947746	path:mmu00790	Metabolism	Metabolism of cofactors and vitamins	Folate biosynthesis	0	10
0.858054	0.947746	path:mmu03430	Genetic Information Processing	Replication and repair	Mismatch repair	0	10
0.858054	0.947746	path:mmu04964	Organismal Systems	Excretory system	Proximal tubule bicarbonate reclamation	0	10
0.858054	0.947746	path:mmu04977	Organismal Systems	Digestive system	Vitamin digestion and absorption	0	10
0.858054	0.947746	path:mmu05033	Human Diseases	Substance dependence	Nicotine addiction	0	10
0.871297	0.949145	path:mmu00120	Metabolism	Lipid metabolism	Primary bile acid biosynthesis	0	9
0.871297	0.949145	path:mmu05150	Human Diseases	Infectious diseases	Staphylococcus aureus infection	0	9
0.871297	0.949145	path:mmu05320	Human Diseases	Immune diseases	Autoimmune thyroid disease	0	9
0.871297	0.949145	path:mmu05332	Human Diseases	Immune diseases	Graft-versus-host disease	0	9
0.884743	0.950724	path:mmu00360	Metabolism	Amino acid metabolism	Phenylalanine metabolism	0	8
0.884743	0.950724	path:mmu00450	Metabolism	Metabolism of other amino acids	Selenocompound metabolism	0	8
0.884743	0.950724	path:mmu00592	Metabolism	Lipid metabolism	alpha-Linolenic acid metabolism	0	8
0.884743	0.950724	path:mmu05330	Human Diseases	Immune diseases	Allograft rejection	0	8
0.898395	0.951268	path:mmu00053	Metabolism	Carbohydrate metabolism	Ascorbate and aldarate metabolism	0	7
0.898395	0.951268	path:mmu00603	Metabolism	Glycan biosynthesis and metabolism	Glycosphingolipid biosynthesis - globo and isoglobo series	0	7
0.898395	0.951268	path:mmu00770	Metabolism	Metabolism of cofactors and vitamins	Pantothenate and CoA biosynthesis	0	7
0.898395	0.951268	path:mmu00910	Metabolism	Energy metabolism	Nitrogen metabolism	0	7
0.912257	0.951268	path:mmu00072	Metabolism	Lipid metabolism	Synthesis and degradation of ketone bodies	0	6
0.912257	0.951268	path:mmu00750	Metabolism	Metabolism of cofactors and vitamins	Vitamin B6 metabolism	0	6
0.912257	0.951268	path:mmu00920	Metabolism	Energy metabolism	Sulfur metabolism	0	6
0.912257	0.951268	path:mmu03450	Genetic Information Processing	Replication and repair	Non-homologous end-joining	0	6
0.912257	0.951268	path:mmu04122	Genetic Information Processing	Folding, sorting and degradation	Sulfur relay system	0	6
0.926331	0.956504	path:mmu00430	Metabolism	Metabolism of other amino acids	Taurine and hypotaurine metabolism	0	5
0.926331	0.956504	path:mmu00440	Metabolism	Metabolism of other amino acids	Phosphonate and phosphinate metabolism	0	5
0.926331	0.956504	path:mmu00591	Metabolism	Lipid metabolism	Linoleic acid metabolism	0	5
0.94062	0.968106	path:mmu04950	Human Diseases	Endocrine and metabolic diseases	Maturity onset diabetes of the young	0	4
0.969859	0.979125	path:mmu00232	Metabolism	Biosynthesis of other secondary metabolites	Caffeine metabolism	0	2
0.969859	0.979125	path:mmu00400	Metabolism	Amino acid metabolism	Phenylalanine, tyrosine and tryptophan biosynthesis	0	2
0.969859	0.979125	path:mmu00471	Metabolism	Metabolism of other amino acids	D-Glutamine and D-glutamate metabolism	0	2
0.969859	0.979125	path:mmu00524	Metabolism	Biosynthesis of other secondary metabolites	Neomycin, kanamycin and gentamicin biosynthesis	0	2
0.969859	0.979125	path:mmu00785	Metabolism	Metabolism of cofactors and vitamins	Lipoic acid metabolism	0	2
0.969859	0.979125	path:mmu05310	Human Diseases	Immune diseases	Asthma	0	2
0.984815	0.987931	path:mmu00290	Metabolism	Amino acid metabolism	Valine, leucine and isoleucine biosynthesis	0	1
0.984815	0.987931	path:mmu00780	Metabolism	Metabolism of cofactors and vitamins	Biotin metabolism	0	1
1	1	path:mmu00472	Metabolism	Metabolism of other amino acids	D-Arginine and D-ornithine metabolism	0	0

## Sheet: KEGG_module_2
pv	pv_fdr	term	Brite1	Brite2	kegg_name	hits	BG	Symbols
0.00147508	0.467599	path:mmu04621	Organismal Systems	Immune system	NOD-like receptor signaling pathway	6	87	Ctsb,Gabarapl1,Mapk8,Prkcd,Rnf31,Sugt1
0.0058576	0.85779	path:mmu04930	Human Diseases	Endocrine and metabolic diseases	Type II diabetes mellitus	3	26	Mapk8,Prkcd,Socs4
0.011098	0.85779	path:mmu03050	Genetic Information Processing	Folding, sorting and degradation	Proteasome	3	33	Psmb5,Psmc6,Psme1
0.0165151	0.85779	path:mmu03060	Genetic Information Processing	Folding, sorting and degradation	Protein export	2	14	Oxa1l,Spcs1
0.0175765	0.85779	path:mmu04141	Genetic Information Processing	Folding, sorting and degradation	Protein processing in endoplasmic reticulum	5	110	Dad1,Dnajc3,Ero1l,Mapk8,Uggt2
0.0213648	0.85779	path:mmu04217	Cellular Processes	Cell growth and death	Necroptosis	4	77	Chmp7,Mapk8,Parp2,Rnf31
0.0247795	0.85779	path:mmu04140	Cellular Processes	Transport and catabolism	Autophagy - animal	4	81	Ctsb,Gabarapl1,Mapk8,Prkcd
0.0458418	0.85779	path:mmu05165	Human Diseases	Infectious diseases	Human papillomavirus infection	0	205
0.04945	0.85779	path:mmu04612	Organismal Systems	Immune system	Antigen processing and presentation	2	26	Ctsb,Psme1
0.064798	0.85779	path:mmu04933	Human Diseases	Endocrine and metabolic diseases	AGE-RAGE signaling pathway in diabetic complications	3	70	Mapk8,Prkcd,Serpine1
0.0898781	0.85779	path:mmu05164	Human Diseases	Infectious diseases	Influenza A	3	83	Dnajc3,Mapk8,Pabpn1
0.0977698	0.85779	path:mmu04210	Cellular Processes	Cell growth and death	Apoptosis	3	87	Ctsb,Mapk8,Parp2
0.103528	0.85779	path:mmu04912	Organismal Systems	Endocrine system	GnRH signaling pathway	2	42	Mapk8,Prkcd
0.109596	0.85779	path:mmu03013	Genetic Information Processing	Translation	RNA transport	3	93	Acin1,Nupl1,Prmt5
0.110448	0.85779	path:mmu04137	Cellular Processes	Transport and catabolism	Mitophagy - animal	2	44	Gabarapl1,Mapk8
0.113895	0.85779	path:mmu04750	Organismal Systems	Sensory system	Inflammatory mediator regulation of TRP channels	2	45	Mapk8,Prkcd
0.113895	0.85779	path:mmu04917	Organismal Systems	Endocrine system	Prolactin signaling pathway	2	45	Mapk8,Socs4
0.122727	0.85779	path:mmu05205	Human Diseases	Cancers	Proteoglycans in cancer	0	140
0.126516	0.85779	path:mmu01100	Mus Musculus	Metabolic pathways	Metabolic pathways	9	691	Ahcyl2,Dad1,Mtmr6,Pcca,Pigh,Pnp,Polr3d,Thtpa,Tkt
0.129251	0.85779	path:mmu00730	Metabolism	Metabolism of cofactors and vitamins	Thiamine metabolism	1	10	Thtpa
0.130922	0.85779	path:mmu03015	Genetic Information Processing	Translation	mRNA surveillance pathway	2	50	Acin1,Pabpn1
0.1376	0.85779	path:mmu05142	Human Diseases	Infectious diseases	Chagas disease (American trypanosomiasis)	2	52	Mapk8,Serpine1
0.138287	0.85779	path:mmu00230	Metabolism	Nucleotide metabolism	Purine metabolism	3	108	Gmpr2,Pnp,Polr3d
0.143961	0.85779	path:mmu04151	Environmental Information Processing	Signal transduction	PI3K-Akt signaling pathway	1	205	Lpar6
0.147433	0.85779	path:mmu03018	Genetic Information Processing	Folding, sorting and degradation	RNA degradation	2	55	Dcp1a,Dis3
0.149319	0.85779	path:mmu04015	Environmental Information Processing	Signal transduction	Rap1 signaling pathway	0	127
0.158599	0.85779	path:mmu04810	Cellular Processes	Cell motility	Regulation of actin cytoskeleton	0	123
0.160738	0.85779	path:mmu00760	Metabolism	Metabolism of cofactors and vitamins	Nicotinate and nicotinamide metabolism	1	13	Pnp
0.162714	0.85779	path:mmu05169	Human Diseases	Infectious diseases	Epstein-Barr virus infection	3	122	Mapk8,Polr3d,Psmc6
0.172272	0.85779	path:mmu04010	Environmental Information Processing	Signal transduction	MAPK signaling pathway	1	187	Mapk8
0.176272	0.85779	path:mmu05200	Human Diseases	Cancers	Pathways in cancer	2	244	Lpar6,Mapk8
0.180062	0.85779	path:mmu00030	Metabolism	Carbohydrate metabolism	Pentose phosphate pathway	1	15	Tkt
0.180062	0.85779	path:mmu04136	Cellular Processes	Transport and catabolism	Autophagy - other	1	15	Gabarapl1
0.186689	0.85779	path:mmu00240	Metabolism	Nucleotide metabolism	Pyrimidine metabolism	2	68	Pnp,Polr3d
0.186689	0.85779	path:mmu01200	Mus Musculus	Metabolic pathways	Carbon metabolism	2	68	Pcca,Tkt
0.189246	0.85779	path:mmu00563	Metabolism	Glycan biosynthesis and metabolism	Glycosylphosphatidylinositol (GPI)-anchor biosynthesis	1	16	Pigh
0.189443	0.85779	path:mmu04931	Human Diseases	Endocrine and metabolic diseases	Insulin resistance	2	69	Mapk8,Prkcd
0.195819	0.85779	path:mmu05203	Human Diseases	Cancers	Viral carcinogenesis	0	109
0.198122	0.85779	path:mmu00630	Metabolism	Carbohydrate metabolism	Glyoxylate and dicarboxylate metabolism	1	17	Pcca
0.200041	0.85779	path:mmu04722	Organismal Systems	Nervous system	Neurotrophin signaling pathway	2	73	Mapk8,Prkcd
0.206695	0.85779	path:mmu04215	Cellular Processes	Cell growth and death	Apoptosis - multiple species	1	18	Mapk8
0.209942	0.85779	path:mmu04371	Environmental Information Processing	Signal transduction	Apelin signaling pathway	2	77	Gabarapl1,Serpine1
0.214974	0.85779	path:mmu00640	Metabolism	Carbohydrate metabolism	Propanoate metabolism	1	19	Pcca
0.214974	0.85779	path:mmu03410	Genetic Information Processing	Replication and repair	Base excision repair	1	19	Parp2
0.214974	0.85779	path:mmu04710	Organismal Systems	Environmental adaptation	Circadian rhythm	1	19	Fbxl3
0.22125	0.85779	path:mmu05166	Human Diseases	Infectious diseases	HTLV-I infection	1	160	Mapk8
0.222965	0.85779	path:mmu03022	Genetic Information Processing	Transcription	Basal transcription factors	1	20	Gtf2f2
0.222965	0.85779	path:mmu04610	Organismal Systems	Immune system	Complement and coagulation cascades	1	20	Serpine1
0.227107	0.85779	path:mmu04144	Cellular Processes	Transport and catabolism	Endocytosis	1	157	Chmp7
0.231044	0.85779	path:mmu05010	Human Diseases	Neurodegenerative diseases	Alzheimer's disease	0	98
0.231522	0.85779	path:mmu04068	Environmental Information Processing	Signal transduction	FoxO signaling pathway	2	87	Gabarapl1,Mapk8
0.233427	0.85779	path:mmu04910	Organismal Systems	Endocrine system	Insulin signaling pathway	2	88	Mapk8,Socs4
0.234542	0.85779	path:mmu04150	Environmental Information Processing	Signal transduction	mTOR signaling pathway	0	97
0.237098	0.85779	path:mmu05418	Human Diseases	Cardiovascular diseases	Fluid shear stress and atherosclerosis	2	90	Bmpr1a,Mapk8
0.238093	0.85779	path:mmu05016	Human Diseases	Neurodegenerative diseases	Huntington's disease	0	96
0.238109	0.85779	path:mmu03030	Genetic Information Processing	Replication and repair	DNA replication	1	22	Rnaseh2b
0.238864	0.85779	path:mmu04390	Environmental Information Processing	Signal transduction	Hippo signaling pathway	2	91	Bmpr1a,Serpine1
0.241697	0.85779	path:mmu05224	Human Diseases	Cancers	Breast cancer	0	95
0.243888	0.85779	path:mmu04310	Environmental Information Processing	Signal transduction	Wnt signaling pathway	2	94	Chd8,Mapk8
0.245356	0.85779	path:mmu03010	Genetic Information Processing	Translation	Ribosome	0	94
0.252178	0.85779	path:mmu03020	Genetic Information Processing	Transcription	RNA polymerase	1	24	Polr3d
0.252178	0.85779	path:mmu03420	Genetic Information Processing	Replication and repair	Nucleotide excision repair	1	24	Ercc6
0.256517	0.85779	path:mmu05167	Human Diseases	Infectious diseases	Kaposi's sarcoma-associated herpesvirus infection	2	103	Gabarapl1,Mapk8
0.258826	0.85779	path:mmu00270	Metabolism	Amino acid metabolism	Cysteine and methionine metabolism	1	25	Ahcyl2
0.268491	0.85779	path:mmu04022	Environmental Information Processing	Signal transduction	cGMP-PKG signaling pathway	0	88
0.275735	0.85779	path:mmu04360	Organismal Systems	Development	Axon guidance	1	133	Dpysl2
0.27729	0.85779	path:mmu00310	Metabolism	Amino acid metabolism	Lysine degradation	1	28	Setdb2
0.279846	0.85779	path:mmu04510	Cellular Processes	Cellular community - eukaryotes	Focal adhesion	1	131	Mapk8
0.281899	0.85779	path:mmu04014	Environmental Information Processing	Signal transduction	Ras signaling pathway	1	130	Mapk8
0.282971	0.85779	path:mmu00510	Metabolism	Glycan biosynthesis and metabolism	N-Glycan biosynthesis	1	29	Dad1
0.282971	0.85779	path:mmu05133	Human Diseases	Infectious diseases	Pertussis	1	29	Mapk8
0.288424	0.85779	path:mmu04622	Organismal Systems	Immune system	RIG-I-like receptor signaling pathway	1	30	Mapk8
0.288424	0.85779	path:mmu04664	Organismal Systems	Immune system	Fc epsilon RI signaling pathway	1	30	Mapk8
0.288424	0.85779	path:mmu04924	Organismal Systems	Endocrine system	Renin secretion	1	30	Ctsb
0.293656	0.85779	path:mmu04623	Organismal Systems	Immune system	Cytosolic DNA-sensing pathway	1	31	Polr3d
0.298199	0.85779	path:mmu05225	Human Diseases	Cancers	Hepatocellular carcinoma	1	122	Pbrm1
0.298671	0.85779	path:mmu00280	Metabolism	Amino acid metabolism	Valine, leucine and isoleucine degradation	1	32	Pcca
0.307313	0.85779	path:mmu04152	Environmental Information Processing	Signal transduction	AMPK signaling pathway	0	79
0.311957	0.85779	path:mmu04020	Environmental Information Processing	Signal transduction	Calcium signaling pathway	0	78
0.31667	0.85779	path:mmu04110	Cellular Processes	Cell growth and death	Cell cycle	0	77
0.321454	0.85779	path:mmu04921	Organismal Systems	Endocrine system	Oxytocin signaling pathway	0	76
0.32631	0.85779	path:mmu05012	Human Diseases	Neurodegenerative diseases	Parkinson's disease	0	75
0.327268	0.85779	path:mmu05206	Human Diseases	Cancers	MicroRNAs in cancer	1	107	Spry2
0.331239	0.85779	path:mmu00190	Metabolism	Energy metabolism	Oxidative phosphorylation	0	74
0.332666	0.85779	path:mmu04218	Cellular Processes	Cell growth and death	Cellular senescence	1	104	Serpine1
0.33488	0.85779	path:mmu00562	Metabolism	Carbohydrate metabolism	Inositol phosphate metabolism	1	41	Mtmr6
0.33488	0.85779	path:mmu04657	Organismal Systems	Immune system	IL-17 signaling pathway	1	41	Mapk8
0.33488	0.85779	path:mmu04727	Organismal Systems	Nervous system	GABAergic synapse	1	41	Gabarapl1
0.33488	0.85779	path:mmu04920	Organismal Systems	Endocrine system	Adipocytokine signaling pathway	1	41	Mapk8
0.33488	0.85779	path:mmu05132	Human Diseases	Infectious diseases	Salmonella infection	1	41	Mapk8
0.339552	0.85779	path:mmu05202	Human Diseases	Cancers	Transcriptional misregulation in cancer	1	100	Aff1
0.341319	0.85779	path:mmu04145	Cellular Processes	Transport and catabolism	Phagosome	0	72
0.346378	0.85779	path:mmu01230	Mus Musculus	Metabolic pathways	Biosynthesis of amino acids	1	45	Tkt
0.347559	0.85779	path:mmu04932	Human Diseases	Endocrine and metabolic diseases	Non-alcoholic fatty liver disease (NAFLD)	1	95	Mapk8
0.351194	0.85779	path:mmu04658	Organismal Systems	Immune system	Th1 and Th2 cell differentiation	1	47	Mapk8
0.353383	0.85779	path:mmu04115	Cellular Processes	Cell growth and death	p53 signaling pathway	1	48	Serpine1
0.353389	0.85779	path:mmu04530	Cellular Processes	Cellular community - eukaryotes	Tight junction	1	91	Mapk8
0.354755	0.85779	path:mmu04024	Environmental Information Processing	Signal transduction	cAMP signaling pathway	1	90	Mapk8
0.35543	0.85779	path:mmu04620	Organismal Systems	Immune system	Toll-like receptor signaling pathway	1	49	Mapk8
0.356082	0.85779	path:mmu05161	Human Diseases	Infectious diseases	Hepatitis B	1	89	Mapk8
0.356082	0.85779	path:mmu05168	Human Diseases	Infectious diseases	Herpes simplex infection	1	89	Mapk8
0.357013	0.85779	path:mmu04261	Organismal Systems	Circulatory system	Adrenergic signaling in cardiomyocytes	0	69
0.357013	0.85779	path:mmu05162	Human Diseases	Infectious diseases	Measles	0	69
0.357369	0.85779	path:mmu04062	Organismal Systems	Immune system	Chemokine signaling pathway	1	88	Prkcd
0.357369	0.85779	path:mmu04142	Cellular Processes	Transport and catabolism	Lysosome	1	88	Ctsb
0.357369	0.85779	path:mmu04550	Cellular Processes	Cellular community - eukaryotes	Signaling pathways regulating pluripotency of stem cells	1	88	Bmpr1a
0.358613	0.85779	path:mmu04060	Environmental Information Processing	Signaling molecules and interaction	Cytokine-cytokine receptor interaction	1	87	Bmpr1a
0.360761	0.85779	path:mmu04666	Organismal Systems	Immune system	Fc gamma R-mediated phagocytosis	1	52	Prkcd
0.360761	0.85779	path:mmu04914	Organismal Systems	Endocrine system	Progesterone-mediated oocyte maturation	1	52	Mapk8
0.36228	0.85779	path:mmu03008	Genetic Information Processing	Translation	Ribosome biogenesis in eukaryotes	1	53	Gnl3
0.36228	0.85779	path:mmu04915	Organismal Systems	Endocrine system	Estrogen signaling pathway	1	53	Prkcd
0.363674	0.85779	path:mmu05210	Human Diseases	Cancers	Colorectal cancer	1	54	Mapk8
0.365102	0.85779	path:mmu04072	Environmental Information Processing	Signal transduction	Phospholipase D signaling pathway	1	81	Lpar6
0.366005	0.85779	path:mmu04919	Organismal Systems	Endocrine system	Thyroid hormone signaling pathway	1	80	Med4
0.366005	0.85779	path:mmu04926	Organismal Systems	Endocrine system	Relaxin signaling pathway	1	80	Mapk8
0.366106	0.85779	path:mmu04080	Environmental Information Processing	Signaling molecules and interaction	Neuroactive ligand-receptor interaction	1	56	Lpar6
0.366106	0.85779	path:mmu04350	Environmental Information Processing	Signal transduction	TGF-beta signaling pathway	1	56	Bmpr1a
0.366106	0.85779	path:mmu04659	Organismal Systems	Immune system	Th17 cell differentiation	1	56	Mapk8
0.366106	0.85779	path:mmu05212	Human Diseases	Cancers	Pancreatic cancer	1	56	Mapk8
0.367642	0.85779	path:mmu04120	Genetic Information Processing	Folding, sorting and degradation	Ubiquitin mediated proteolysis	1	78	Rhobtb2
0.367642	0.85779	path:mmu05152	Human Diseases	Infectious diseases	Tuberculosis	1	78	Mapk8
0.367871	0.85779	path:mmu05215	Human Diseases	Cancers	Prostate cancer	0	67
0.368081	0.85779	path:mmu04012	Environmental Information Processing	Signal transduction	ErbB signaling pathway	1	58	Mapk8
0.368372	0.85779	path:mmu04630	Environmental Information Processing	Signal transduction	Jak-STAT signaling pathway	1	77	Socs4
0.368905	0.85779	path:mmu04270	Organismal Systems	Circulatory system	Vascular smooth muscle contraction	1	59	Prkcd
0.369041	0.85779	path:mmu04668	Environmental Information Processing	Signal transduction	TNF signaling pathway	1	76	Mapk8
0.369624	0.85779	path:mmu04070	Environmental Information Processing	Signal transduction	Phosphatidylinositol signaling system	1	60	Mtmr6
0.370241	0.85779	path:mmu05231	Human Diseases	Cancers	Choline metabolism in cancer	1	61	Mapk8
0.370759	0.85779	path:mmu01522	Human Diseases	Drug resistance	Endocrine resistance	1	62	Mapk8
0.370759	0.85779	path:mmu05145	Human Diseases	Infectious diseases	Toxoplasmosis	1	62	Mapk8
0.371063	0.85779	path:mmu04380	Organismal Systems	Development	Osteoclast differentiation	1	72	Mapk8
0.371181	0.85779	path:mmu04728	Organismal Systems	Nervous system	Dopaminergic synapse	1	63	Mapk8
0.371394	0.85779	path:mmu04723	Organismal Systems	Nervous system	Retrograde endocannabinoid signaling	1	71	Mapk8
0.371508	0.85779	path:mmu03040	Genetic Information Processing	Transcription	Spliceosome	1	64	Acin1
0.371651	0.85779	path:mmu04066	Environmental Information Processing	Signal transduction	HIF-1 signaling pathway	1	70	Serpine1
0.371832	0.85779	path:mmu05160	Human Diseases	Infectious diseases	Hepatitis C	1	69	Mapk8
0.371955	0.85779	path:mmu04071	Environmental Information Processing	Signal transduction	Sphingolipid signaling pathway	1	67	Mapk8
0.373423	0.85779	path:mmu05222	Human Diseases	Cancers	Small cell lung cancer	0	66
0.390581	0.878115	path:mmu01521	Human Diseases	Drug resistance	EGFR tyrosine kinase inhibitor resistance	0	63
0.390581	0.878115	path:mmu04114	Cellular Processes	Cell growth and death	Oocyte meiosis	0	63
0.390581	0.878115	path:mmu04611	Organismal Systems	Immune system	Platelet activation	0	63
0.408523	0.911984	path:mmu05220	Human Diseases	Cancers	Chronic myeloid leukemia	0	60
0.414683	0.919262	path:mmu05034	Human Diseases	Substance dependence	Alcoholism	0	59
0.433723	0.945907	path:mmu04211	Organismal Systems	Aging	Longevity regulating pathway	0	56
0.433723	0.945907	path:mmu04725	Organismal Systems	Nervous system	Cholinergic synapse	0	56
0.446896	0.945907	path:mmu05146	Human Diseases	Infectious diseases	Amoebiasis	0	54
0.453631	0.945907	path:mmu04512	Environmental Information Processing	Signaling molecules and interaction	ECM-receptor interaction	0	53
0.453631	0.945907	path:mmu04520	Cellular Processes	Cellular community - eukaryotes	Adherens junction	0	53
0.460466	0.945907	path:mmu04670	Organismal Systems	Immune system	Leukocyte transendothelial migration	0	52
0.460466	0.945907	path:mmu04724	Organismal Systems	Nervous system	Glutamatergic synapse	0	52
0.460466	0.945907	path:mmu05414	Human Diseases	Cardiovascular diseases	Dilated cardiomyopathy (DCM)	0	52
0.467404	0.945907	path:mmu04660	Organismal Systems	Immune system	T cell receptor signaling pathway	0	51
0.467404	0.945907	path:mmu05100	Human Diseases	Infectious diseases	Bacterial invasion of epithelial cells	0	51
0.467404	0.945907	path:mmu05410	Human Diseases	Cardiovascular diseases	Hypertrophic cardiomyopathy (HCM)	0	51
0.474445	0.945907	path:mmu00564	Metabolism	Lipid metabolism	Glycerophospholipid metabolism	0	50
0.474445	0.945907	path:mmu01524	Human Diseases	Drug resistance	Platinum drug resistance	0	50
0.474445	0.945907	path:mmu04146	Cellular Processes	Transport and catabolism	Peroxisome	0	50
0.474445	0.945907	path:mmu04514	Environmental Information Processing	Signaling molecules and interaction	Cell adhesion molecules (CAMs)	0	50
0.474445	0.945907	path:mmu04916	Organismal Systems	Endocrine system	Melanogenesis	0	50
0.481592	0.948228	path:mmu04064	Environmental Information Processing	Signal transduction	NF-kappa B signaling pathway	0	49
0.481592	0.948228	path:mmu04922	Organismal Systems	Endocrine system	Glucagon signaling pathway	0	49
0.488846	0.953357	path:mmu04650	Organismal Systems	Immune system	Natural killer cell mediated cytotoxicity	0	48
0.496208	0.953357	path:mmu04540	Cellular Processes	Cellular community - eukaryotes	Gap junction	0	47
0.496208	0.953357	path:mmu05412	Human Diseases	Cardiovascular diseases	Arrhythmogenic right ventricular cardiomyopathy (ARVC)	0	47
0.50368	0.953357	path:mmu05211	Human Diseases	Cancers	Renal cell carcinoma	0	46
0.50368	0.953357	path:mmu05214	Human Diseases	Cancers	Glioma	0	46
0.50368	0.953357	path:mmu05223	Human Diseases	Cancers	Non-small cell lung cancer	0	46
0.511264	0.953357	path:mmu04713	Organismal Systems	Environmental adaptation	Circadian entrainment	0	45
0.511264	0.953357	path:mmu05218	Human Diseases	Cancers	Melanoma	0	45
0.511264	0.953357	path:mmu05221	Human Diseases	Cancers	Acute myeloid leukemia	0	45
0.526774	0.958555	path:mmu04726	Organismal Systems	Nervous system	Serotonergic synapse	0	43
0.526774	0.958555	path:mmu05032	Human Diseases	Substance dependence	Morphine addiction	0	43
0.534703	0.958555	path:mmu04974	Organismal Systems	Digestive system	Protein digestion and absorption	0	42
0.534703	0.958555	path:mmu05217	Human Diseases	Cancers	Basal cell carcinoma	0	42
0.54275	0.958555	path:mmu03320	Organismal Systems	Endocrine system	PPAR signaling pathway	0	41
0.54275	0.958555	path:mmu04925	Organismal Systems	Endocrine system	Aldosterone synthesis and secretion	0	41
0.54275	0.958555	path:mmu05230	Human Diseases	Cancers	Central carbon metabolism in cancer	0	41
0.550918	0.958555	path:mmu04662	Organismal Systems	Immune system	B cell receptor signaling pathway	0	40
0.559208	0.958555	path:mmu04213	Organismal Systems	Aging	Longevity regulating pathway - multiple species	0	39
0.559208	0.958555	path:mmu05213	Human Diseases	Cancers	Endometrial cancer	0	39
0.567622	0.958555	path:mmu05323	Human Diseases	Immune diseases	Rheumatoid arthritis	0	38
0.584828	0.958555	path:mmu00480	Metabolism	Metabolism of other amino acids	Glutathione metabolism	0	36
0.584828	0.958555	path:mmu01212	Mus Musculus	Metabolic pathways	Fatty acid metabolism	0	36
0.584828	0.958555	path:mmu04370	Environmental Information Processing	Signal transduction	VEGF signaling pathway	0	36
0.593624	0.958555	path:mmu04260	Organismal Systems	Circulatory system	Cardiac muscle contraction	0	35
0.602552	0.958555	path:mmu00520	Metabolism	Carbohydrate metabolism	Amino sugar and nucleotide sugar metabolism	0	34
0.602552	0.958555	path:mmu00970	Genetic Information Processing	Translation	Aminoacyl-tRNA biosynthesis	0	34
0.602552	0.958555	path:mmu04923	Organismal Systems	Endocrine system	Regulation of lipolysis in adipocytes	0	34
0.602552	0.958555	path:mmu04970	Organismal Systems	Digestive system	Salivary secretion	0	34
0.611613	0.958555	path:mmu04911	Organismal Systems	Endocrine system	Insulin secretion	0	33
0.620809	0.958555	path:mmu00561	Metabolism	Lipid metabolism	Glycerolipid metabolism	0	32
0.620809	0.958555	path:mmu04340	Environmental Information Processing	Signal transduction	Hedgehog signaling pathway	0	32
0.620809	0.958555	path:mmu04640	Organismal Systems	Immune system	Hematopoietic cell lineage	0	32
0.630142	0.958555	path:mmu04330	Environmental Information Processing	Signal transduction	Notch signaling pathway	0	31
0.630142	0.958555	path:mmu04720	Organismal Systems	Nervous system	Long-term potentiation	0	31
0.639615	0.958555	path:mmu00010	Metabolism	Carbohydrate metabolism	Glycolysis / Gluconeogenesis	0	30
0.639615	0.958555	path:mmu00330	Metabolism	Amino acid metabolism	Arginine and proline metabolism	0	30
0.639615	0.958555	path:mmu04730	Organismal Systems	Nervous system	Long-term depression	0	30
0.639615	0.958555	path:mmu04918	Organismal Systems	Endocrine system	Thyroid hormone synthesis	0	30
0.649229	0.958555	path:mmu00071	Metabolism	Lipid metabolism	Fatty acid degradation	0	29
0.649229	0.958555	path:mmu04216	Cellular Processes	Cell growth and death	Ferroptosis	0	29
0.649229	0.958555	path:mmu04721	Organismal Systems	Nervous system	Synaptic vesicle cycle	0	29
0.649229	0.958555	path:mmu04972	Organismal Systems	Digestive system	Pancreatic secretion	0	29
0.649229	0.958555	path:mmu05014	Human Diseases	Neurodegenerative diseases	Amyotrophic lateral sclerosis (ALS)	0	29
0.649229	0.958555	path:mmu05140	Human Diseases	Infectious diseases	Leishmaniasis	0	29
0.658987	0.958555	path:mmu04971	Organismal Systems	Digestive system	Gastric acid secretion	0	28
0.658987	0.958555	path:mmu05219	Human Diseases	Cancers	Bladder cancer	0	28
0.678941	0.958555	path:mmu04976	Organismal Systems	Digestive system	Bile secretion	0	26
0.678941	0.958555	path:mmu05031	Human Diseases	Substance dependence	Amphetamine addiction	0	26
0.678941	0.958555	path:mmu05134	Human Diseases	Infectious diseases	Legionellosis	0	26
0.678941	0.958555	path:mmu05321	Human Diseases	Immune diseases	Inflammatory bowel disease (IBD)	0	26
0.689142	0.958555	path:mmu00600	Metabolism	Lipid metabolism	Sphingolipid metabolism	0	25
0.689142	0.958555	path:mmu00980	Metabolism	Xenobiotics biodegradation and metabolism	Metabolism of xenobiotics by cytochrome P450	0	25
0.689142	0.958555	path:mmu02010	Environmental Information Processing	Membrane transport	ABC transporters	0	25
0.689142	0.958555	path:mmu05204	Human Diseases	Cancers	Chemical carcinogenesis	0	25
0.689142	0.958555	path:mmu05416	Human Diseases	Cardiovascular diseases	Viral myocarditis	0	25
0.699495	0.958555	path:mmu03460	Genetic Information Processing	Replication and repair	Fanconi anemia pathway	0	24
0.699495	0.958555	path:mmu05322	Human Diseases	Immune diseases	Systemic lupus erythematosus	0	24
0.710002	0.958555	path:mmu00250	Metabolism	Amino acid metabolism	Alanine, aspartate and glutamate metabolism	0	23
0.710002	0.958555	path:mmu00260	Metabolism	Amino acid metabolism	Glycine, serine and threonine metabolism	0	23
0.710002	0.958555	path:mmu00620	Metabolism	Carbohydrate metabolism	Pyruvate metabolism	0	23
0.710002	0.958555	path:mmu03440	Genetic Information Processing	Replication and repair	Homologous recombination	0	23
0.710002	0.958555	path:mmu05216	Human Diseases	Cancers	Thyroid cancer	0	23
0.720667	0.958555	path:mmu00590	Metabolism	Lipid metabolism	Arachidonic acid metabolism	0	22
0.720667	0.958555	path:mmu04978	Organismal Systems	Digestive system	Mineral absorption	0	22
0.73149	0.958555	path:mmu00860	Metabolism	Metabolism of cofactors and vitamins	Porphyrin and chlorophyll metabolism	0	21
0.73149	0.958555	path:mmu01523	Human Diseases	Drug resistance	Antifolate resistance	0	21
0.73149	0.958555	path:mmu05030	Human Diseases	Substance dependence	Cocaine addiction	0	21
0.73149	0.958555	path:mmu05144	Human Diseases	Infectious diseases	Malaria	0	21
0.742474	0.958555	path:mmu00020	Metabolism	Carbohydrate metabolism	Citrate cycle (TCA cycle)	0	20
0.742474	0.958555	path:mmu00410	Metabolism	Metabolism of other amino acids	beta-Alanine metabolism	0	20
0.742474	0.958555	path:mmu00982	Metabolism	Xenobiotics biodegradation and metabolism	Drug metabolism - cytochrome P450	0	20
0.742474	0.958555	path:mmu04960	Organismal Systems	Excretory system	Aldosterone-regulated sodium reabsorption	0	20
0.742474	0.958555	path:mmu04962	Organismal Systems	Excretory system	Vasopressin-regulated water reabsorption	0	20
0.753623	0.958555	path:mmu00052	Metabolism	Carbohydrate metabolism	Galactose metabolism	0	19
0.753623	0.958555	path:mmu00983	Metabolism	Xenobiotics biodegradation and metabolism	Drug metabolism - other enzymes	0	19
0.753623	0.958555	path:mmu04913	Organismal Systems	Endocrine system	Ovarian steroidogenesis	0	19
0.764937	0.958555	path:mmu04130	Genetic Information Processing	Folding, sorting and degradation	SNARE interactions in vesicular transport	0	18
0.764937	0.958555	path:mmu04740	Organismal Systems	Sensory system	Olfactory transduction	0	18
0.764937	0.958555	path:mmu04961	Organismal Systems	Excretory system	Endocrine and other factor-regulated calcium reabsorption	0	18
0.77642	0.958555	path:mmu00051	Metabolism	Carbohydrate metabolism	Fructose and mannose metabolism	0	17
0.77642	0.958555	path:mmu00532	Metabolism	Glycan biosynthesis and metabolism	Glycosaminoglycan biosynthesis - chondroitin sulfate / dermatan sulfate	0	17
0.77642	0.958555	path:mmu00565	Metabolism	Lipid metabolism	Ether lipid metabolism	0	17
0.77642	0.958555	path:mmu04392	Environmental Information Processing	Signal transduction	Hippo signaling pathway - multiple species	0	17
0.77642	0.958555	path:mmu04973	Organismal Systems	Digestive system	Carbohydrate digestion and absorption	0	17
0.788074	0.958555	path:mmu00380	Metabolism	Amino acid metabolism	Tryptophan metabolism	0	16
0.788074	0.958555	path:mmu00500	Metabolism	Carbohydrate metabolism	Starch and sucrose metabolism	0	16
0.788074	0.958555	path:mmu00512	Metabolism	Glycan biosynthesis and metabolism	Mucin type O-glycan biosynthesis	0	16
0.788074	0.958555	path:mmu05020	Human Diseases	Neurodegenerative diseases	Prion diseases	0	16
0.799902	0.958555	path:mmu00534	Metabolism	Glycan biosynthesis and metabolism	Glycosaminoglycan biosynthesis - heparan sulfate / heparin	0	15
0.799902	0.958555	path:mmu00830	Metabolism	Metabolism of cofactors and vitamins	Retinol metabolism	0	15
0.799902	0.958555	path:mmu00900	Metabolism	Metabolism of terpenoids and polyketides	Terpenoid backbone biosynthesis	0	15
0.811906	0.958555	path:mmu00350	Metabolism	Amino acid metabolism	Tyrosine metabolism	0	14
0.811906	0.958555	path:mmu00531	Metabolism	Glycan biosynthesis and metabolism	Glycosaminoglycan degradation	0	14
0.811906	0.958555	path:mmu00601	Metabolism	Glycan biosynthesis and metabolism	Glycosphingolipid biosynthesis - lacto and neolacto series	0	14
0.811906	0.958555	path:mmu04742	Organismal Systems	Sensory system	Taste transduction	0	14
0.824089	0.958555	path:mmu00100	Metabolism	Lipid metabolism	Steroid biosynthesis	0	13
0.824089	0.958555	path:mmu00511	Metabolism	Glycan biosynthesis and metabolism	Other glycan degradation	0	13
0.824089	0.958555	path:mmu00670	Metabolism	Metabolism of cofactors and vitamins	One carbon pool by folate	0	13
0.824089	0.958555	path:mmu01040	Metabolism	Lipid metabolism	Biosynthesis of unsaturated fatty acids	0	13
0.836454	0.958555	path:mmu00062	Metabolism	Lipid metabolism	Fatty acid elongation	0	12
0.836454	0.958555	path:mmu00514	Metabolism	Glycan biosynthesis and metabolism	Other types of O-glycan biosynthesis	0	12
0.836454	0.958555	path:mmu01210	Mus Musculus	Metabolic pathways	2-Oxocarboxylic acid metabolism	0	12
0.836454	0.958555	path:mmu04940	Human Diseases	Endocrine and metabolic diseases	Type I diabetes mellitus	0	12
0.849002	0.958555	path:mmu00040	Metabolism	Carbohydrate metabolism	Pentose and glucuronate interconversions	0	11
0.849002	0.958555	path:mmu00061	Metabolism	Lipid metabolism	Fatty acid biosynthesis	0	11
0.849002	0.958555	path:mmu00220	Metabolism	Amino acid metabolism	Arginine biosynthesis	0	11
0.849002	0.958555	path:mmu00340	Metabolism	Amino acid metabolism	Histidine metabolism	0	11
0.849002	0.958555	path:mmu00650	Metabolism	Carbohydrate metabolism	Butanoate metabolism	0	11
0.849002	0.958555	path:mmu04614	Organismal Systems	Endocrine system	Renin-angiotensin system	0	11
0.849002	0.958555	path:mmu04672	Organismal Systems	Immune system	Intestinal immune network for IgA production	0	11
0.849002	0.958555	path:mmu04966	Organismal Systems	Excretory system	Collecting duct acid secretion	0	11
0.849002	0.958555	path:mmu04975	Organismal Systems	Digestive system	Fat digestion and absorption	0	11
0.849002	0.958555	path:mmu05143	Human Diseases	Infectious diseases	African trypanosomiasis	0	11
0.849002	0.958555	path:mmu05340	Human Diseases	Immune diseases	Primary immunodeficiency	0	11
0.861738	0.958555	path:mmu00140	Metabolism	Lipid metabolism	Steroid hormone biosynthesis	0	10
0.861738	0.958555	path:mmu00515	Metabolism	Glycan biosynthesis and metabolism	Mannose type O-glycan biosynthesis	0	10
0.861738	0.958555	path:mmu00533	Metabolism	Glycan biosynthesis and metabolism	Glycosaminoglycan biosynthesis - keratan sulfate	0	10
0.861738	0.958555	path:mmu00604	Metabolism	Glycan biosynthesis and metabolism	Glycosphingolipid biosynthesis - ganglio series	0	10
0.861738	0.958555	path:mmu00790	Metabolism	Metabolism of cofactors and vitamins	Folate biosynthesis	0	10
0.861738	0.958555	path:mmu03430	Genetic Information Processing	Replication and repair	Mismatch repair	0	10
0.861738	0.958555	path:mmu04964	Organismal Systems	Excretory system	Proximal tubule bicarbonate reclamation	0	10
0.861738	0.958555	path:mmu04977	Organismal Systems	Digestive system	Vitamin digestion and absorption	0	10
0.861738	0.958555	path:mmu05033	Human Diseases	Substance dependence	Nicotine addiction	0	10
0.874663	0.958555	path:mmu00120	Metabolism	Lipid metabolism	Primary bile acid biosynthesis	0	9
0.874663	0.958555	path:mmu00130	Metabolism	Metabolism of cofactors and vitamins	Ubiquinone and other terpenoid-quinone biosynthesis	0	9
0.874663	0.958555	path:mmu05150	Human Diseases	Infectious diseases	Staphylococcus aureus infection	0	9
0.874663	0.958555	path:mmu05320	Human Diseases	Immune diseases	Autoimmune thyroid disease	0	9
0.874663	0.958555	path:mmu05332	Human Diseases	Immune diseases	Graft-versus-host disease	0	9
0.88778	0.958555	path:mmu00360	Metabolism	Amino acid metabolism	Phenylalanine metabolism	0	8
0.88778	0.958555	path:mmu00450	Metabolism	Metabolism of other amino acids	Selenocompound metabolism	0	8
0.88778	0.958555	path:mmu00592	Metabolism	Lipid metabolism	alpha-Linolenic acid metabolism	0	8
0.88778	0.958555	path:mmu05330	Human Diseases	Immune diseases	Allograft rejection	0	8
0.901093	0.958555	path:mmu00053	Metabolism	Carbohydrate metabolism	Ascorbate and aldarate metabolism	0	7
0.901093	0.958555	path:mmu00603	Metabolism	Glycan biosynthesis and metabolism	Glycosphingolipid biosynthesis - globo and isoglobo series	0	7
0.901093	0.958555	path:mmu00770	Metabolism	Metabolism of cofactors and vitamins	Pantothenate and CoA biosynthesis	0	7
0.901093	0.958555	path:mmu00910	Metabolism	Energy metabolism	Nitrogen metabolism	0	7
0.914604	0.958555	path:mmu00072	Metabolism	Lipid metabolism	Synthesis and degradation of ketone bodies	0	6
0.914604	0.958555	path:mmu00750	Metabolism	Metabolism of cofactors and vitamins	Vitamin B6 metabolism	0	6
0.914604	0.958555	path:mmu00920	Metabolism	Energy metabolism	Sulfur metabolism	0	6
0.914604	0.958555	path:mmu03450	Genetic Information Processing	Replication and repair	Non-homologous end-joining	0	6
0.914604	0.958555	path:mmu04122	Genetic Information Processing	Folding, sorting and degradation	Sulfur relay system	0	6
0.928317	0.958555	path:mmu00430	Metabolism	Metabolism of other amino acids	Taurine and hypotaurine metabolism	0	5
0.928317	0.958555	path:mmu00440	Metabolism	Metabolism of other amino acids	Phosphonate and phosphinate metabolism	0	5
0.928317	0.958555	path:mmu00591	Metabolism	Lipid metabolism	Linoleic acid metabolism	0	5
0.928317	0.958555	path:mmu00740	Metabolism	Metabolism of cofactors and vitamins	Riboflavin metabolism	0	5
0.928317	0.958555	path:mmu04744	Organismal Systems	Sensory system	Phototransduction	0	5
0.942233	0.969766	path:mmu04950	Human Diseases	Endocrine and metabolic diseases	Maturity onset diabetes of the young	0	4
0.97069	0.979964	path:mmu00232	Metabolism	Biosynthesis of other secondary metabolites	Caffeine metabolism	0	2
0.97069	0.979964	path:mmu00400	Metabolism	Amino acid metabolism	Phenylalanine, tyrosine and tryptophan biosynthesis	0	2
0.97069	0.979964	path:mmu00471	Metabolism	Metabolism of other amino acids	D-Glutamine and D-glutamate metabolism	0	2
0.97069	0.979964	path:mmu00524	Metabolism	Biosynthesis of other secondary metabolites	Neomycin, kanamycin and gentamicin biosynthesis	0	2
0.97069	0.979964	path:mmu00785	Metabolism	Metabolism of cofactors and vitamins	Lipoic acid metabolism	0	2
0.97069	0.979964	path:mmu05310	Human Diseases	Immune diseases	Asthma	0	2
0.985237	0.988355	path:mmu00290	Metabolism	Amino acid metabolism	Valine, leucine and isoleucine biosynthesis	0	1
0.985237	0.988355	path:mmu00780	Metabolism	Metabolism of cofactors and vitamins	Biotin metabolism	0	1
1	1	path:mmu00472	Metabolism	Metabolism of other amino acids	D-Arginine and D-ornithine metabolism	0	0

## Sheet: KEGG_module_3
pv	pv_fdr	term	Brite1	Brite2	kegg_name	hits	BG	Symbols
1.951e-05	0.00618468	path:mmu03018	Genetic Information Processing	Folding, sorting and degradation	RNA degradation	8	55	Cnot1,Cnot7,Edc4,Exosc6,Lsm4,Lsm6,Mphosph6,Papd5
0.000633359	0.100387	path:mmu04530	Cellular Processes	Cellular community - eukaryotes	Tight junction	8	91	Actg1,Arhgef18,Itgb1,Map2k7,Pard3,Ppp2cb,Prkaca,Rab8a
0.00211986	0.223999	path:mmu03040	Genetic Information Processing	Transcription	Spliceosome	6	64	Cherp,Dhx38,Lsm4,Lsm6,Sf3b3,Xab2
0.0138795	0.573731	path:mmu04144	Cellular Processes	Transport and catabolism	Endocytosis	8	157	Chmp1a,Eps15l1,Pard3,Rab8a,Vps35,Vps36,Vps37a,Vps4a
0.0176524	0.573731	path:mmu05012	Human Diseases	Neurodegenerative diseases	Parkinson's disease	5	75	Cox4i1,Ndufa13,Ndufb7,Prkaca,Slc25a4
0.0193534	0.573731	path:mmu04110	Cellular Processes	Cell growth and death	Cell cycle	5	77	Cdc16,E2f4,Mcm5,Orc6,Tfdp1
0.0195993	0.573731	path:mmu05100	Human Diseases	Infectious diseases	Bacterial invasion of epithelial cells	4	51	Actg1,Bcar1,Itgb1,Pik3cb
0.0207778	0.573731	path:mmu04670	Organismal Systems	Immune system	Leukocyte transendothelial migration	4	52	Actg1,Bcar1,Itgb1,Pik3cb
0.0225102	0.573731	path:mmu04141	Genetic Information Processing	Folding, sorting and degradation	Protein processing in endoplasmic reticulum	6	110	Amfr,Dnaja2,Dnajb1,Map2k7,Mbtps1,Rad23a
0.0302543	0.573731	path:mmu04142	Cellular Processes	Transport and catabolism	Lysosome	5	88	Ap1g1,Ap1m1,Hgsnat,Lamp1,Man2b1
0.0308782	0.573731	path:mmu00970	Genetic Information Processing	Translation	Aminoacyl-tRNA biosynthesis	3	34	Cars2,Farsa,Kars
0.0327889	0.573731	path:mmu05169	Human Diseases	Infectious diseases	Epstein-Barr virus infection	6	122	Csnk2a2,Gtf2e2,Map2k7,Pik3cb,Prkaca,Psmd7
0.0360233	0.573731	path:mmu04611	Organismal Systems	Immune system	Platelet activation	4	63	Actg1,Itgb1,Pik3cb,Prkaca
0.0425069	0.573731	path:mmu00400	Metabolism	Amino acid metabolism	Phenylalanine, tyrosine and tryptophan biosynthesis	1	2	Got2
0.0459515	0.573731	path:mmu01100	Mus Musculus	Metabolic pathways	Metabolic pathways	10	691	Aprt,Cox4i1,Dhodh,Gcdh,Gcsh,Got2,Hgsnat,Mri1,Ndufa13,Ndufb7
0.0511852	0.573731	path:mmu04145	Cellular Processes	Transport and catabolism	Phagosome	4	72	Actg1,Dync1li2,Itgb1,Lamp1
0.0585244	0.573731	path:mmu04668	Environmental Information Processing	Signal transduction	TNF signaling pathway	4	76	Bag4,Map2k7,Mlkl,Pik3cb
0.0603026	0.573731	path:mmu03022	Genetic Information Processing	Transcription	Basal transcription factors	2	20	Gtf2e2,Taf5l
0.0603026	0.573731	path:mmu04962	Organismal Systems	Excretory system	Vasopressin-regulated water reabsorption	2	20	Dync1li2,Prkaca
0.0604056	0.573731	path:mmu04217	Cellular Processes	Cell growth and death	Necroptosis	4	77	Chmp1a,Mlkl,Slc25a4,Vps4a
0.0680859	0.573731	path:mmu04140	Cellular Processes	Transport and catabolism	Autophagy - animal	4	81	Lamp1,Pik3cb,Ppp2cb,Prkaca
0.0701882	0.573731	path:mmu03030	Genetic Information Processing	Replication and repair	DNA replication	2	22	Mcm5,Rnaseh2a
0.0714305	0.573731	path:mmu03015	Genetic Information Processing	Translation	mRNA surveillance pathway	3	50	Ppp2cb,Upf1,Upf3a
0.0720048	0.573731	path:mmu05164	Human Diseases	Infectious diseases	Influenza A	4	83	Actg1,Dnajb1,Map2k7,Pik3cb
0.0742616	0.573731	path:mmu04660	Organismal Systems	Immune system	T cell receptor signaling pathway	3	51	Map2k7,Nfatc3,Pik3cb
0.0755415	0.573731	path:mmu05166	Human Diseases	Infectious diseases	HTLV-I infection	6	160	Cdc16,Nfatc3,Pik3cb,Prkaca,Slc25a4,Vac14
0.0771121	0.573731	path:mmu04914	Organismal Systems	Endocrine system	Progesterone-mediated oocyte maturation	3	52	Cdc16,Pik3cb,Prkaca
0.0771121	0.573731	path:mmu05414	Human Diseases	Cardiovascular diseases	Dilated cardiomyopathy (DCM)	3	52	Actg1,Itgb1,Prkaca
0.078169	0.573731	path:mmu04810	Cellular Processes	Cell motility	Regulation of actin cytoskeleton	5	123	Actg1,Arhgef7,Bcar1,Itgb1,Pik3cb
0.0799794	0.573731	path:mmu04520	Cellular Processes	Cellular community - eukaryotes	Adherens junction	3	53	Actg1,Csnk2a2,Pard3
0.0802835	0.573731	path:mmu03420	Genetic Information Processing	Replication and repair	Nucleotide excision repair	2	24	Cul4a,Rad23a
0.0819656	0.573731	path:mmu04062	Organismal Systems	Immune system	Chemokine signaling pathway	4	88	Bcar1,Pard3,Pik3cb,Prkaca
0.0843238	0.573731	path:mmu04015	Environmental Information Processing	Signal transduction	Rap1 signaling pathway	5	127	Actg1,Bcar1,Itgb1,Pard3,Pik3cb
0.0853827	0.573731	path:mmu00270	Metabolism	Amino acid metabolism	Cysteine and methionine metabolism	2	25	Got2,Mri1
0.0886577	0.573731	path:mmu04350	Environmental Information Processing	Signal transduction	TGF-beta signaling pathway	3	56	E2f4,Ppp2cb,Tfdp1
0.0920575	0.573731	path:mmu03013	Genetic Information Processing	Translation	RNA transport	4	93	Nup133,Nup93,Upf1,Upf3a
0.0935756	0.573731	path:mmu04360	Organismal Systems	Development	Axon guidance	5	133	Efnb2,Itgb1,Nfatc3,Pard3,Pik3cb
0.0941027	0.573731	path:mmu05206	Human Diseases	Cancers	MicroRNAs in cancer	0	107
0.0961029	0.573731	path:mmu04932	Human Diseases	Endocrine and metabolic diseases	Non-alcoholic fatty liver disease (NAFLD)	4	95	Cox4i1,Ndufa13,Ndufb7,Pik3cb
0.0981235	0.573731	path:mmu05016	Human Diseases	Neurodegenerative diseases	Huntington's disease	4	96	Cox4i1,Ndufa13,Ndufb7,Slc25a4
0.102156	0.573731	path:mmu05010	Human Diseases	Neurodegenerative diseases	Alzheimer's disease	4	98	Cox4i1,Nae1,Ndufa13,Ndufb7
0.109052	0.573731	path:mmu04114	Cellular Processes	Cell growth and death	Oocyte meiosis	3	63	Cdc16,Ppp2cb,Prkaca
0.109929	0.573731	path:mmu05202	Human Diseases	Cancers	Transcriptional misregulation in cancer	0	100
0.111014	0.573731	path:mmu04664	Organismal Systems	Immune system	Fc epsilon RI signaling pathway	2	30	Map2k7,Pik3cb
0.111014	0.573731	path:mmu04918	Organismal Systems	Endocrine system	Thyroid hormone synthesis	2	30	Gsr,Prkaca
0.114117	0.573731	path:mmu04218	Cellular Processes	Cell growth and death	Cellular senescence	4	104	E2f4,Nfatc3,Pik3cb,Slc25a4
0.122497	0.573731	path:mmu05200	Human Diseases	Cancers	Pathways in cancer	3	244	Itgb1,Pik3cb,Prkaca
0.123825	0.573731	path:mmu05203	Human Diseases	Cancers	Viral carcinogenesis	4	109	Gtf2e2,Pik3cb,Prkaca,Vac14
0.125584	0.573731	path:mmu03010	Genetic Information Processing	Translation	Ribosome	0	94
0.131204	0.573731	path:mmu04923	Organismal Systems	Endocrine system	Regulation of lipolysis in adipocytes	2	34	Pik3cb,Prkaca
0.131843	0.573731	path:mmu04723	Organismal Systems	Nervous system	Retrograde endocannabinoid signaling	3	71	Ndufa13,Ndufb7,Prkaca
0.140065	0.573731	path:mmu00190	Metabolism	Energy metabolism	Oxidative phosphorylation	3	74	Cox4i1,Ndufa13,Ndufb7
0.145412	0.573731	path:mmu04921	Organismal Systems	Endocrine system	Oxytocin signaling pathway	3	76	Actg1,Nfatc3,Prkaca
0.146673	0.573731	path:mmu04060	Environmental Information Processing	Signaling molecules and interaction	Cytokine-cytokine receptor interaction	0	87
0.146673	0.573731	path:mmu04621	Organismal Systems	Immune system	NOD-like receptor signaling pathway	0	87
0.149123	0.573731	path:mmu00360	Metabolism	Amino acid metabolism	Phenylalanine metabolism	1	8	Got2
0.150641	0.573731	path:mmu04120	Genetic Information Processing	Folding, sorting and degradation	Ubiquitin mediated proteolysis	3	78	Cdc16,Cul4a,Wwp2
0.153208	0.573731	path:mmu04152	Environmental Information Processing	Signal transduction	AMPK signaling pathway	3	79	Pik3cb,Ppp2cb,Rab8a
0.155381	0.573731	path:mmu04213	Organismal Systems	Aging	Longevity regulating pathway - multiple species	2	39	Pik3cb,Prkaca
0.155741	0.573731	path:mmu04919	Organismal Systems	Endocrine system	Thyroid hormone signaling pathway	3	80	Actg1,Pik3cb,Prkaca
0.155741	0.573731	path:mmu04926	Organismal Systems	Endocrine system	Relaxin signaling pathway	3	80	Map2k7,Pik3cb,Prkaca
0.160026	0.573731	path:mmu04662	Organismal Systems	Immune system	B cell receptor signaling pathway	2	40	Nfatc3,Pik3cb
0.161401	0.573731	path:mmu04510	Cellular Processes	Cellular community - eukaryotes	Focal adhesion	4	131	Actg1,Bcar1,Itgb1,Pik3cb
0.164598	0.573731	path:mmu05132	Human Diseases	Infectious diseases	Salmonella infection	2	41	Actg1,Dync1li2
0.169094	0.573731	path:mmu04912	Organismal Systems	Endocrine system	GnRH signaling pathway	2	42	Map2k7,Prkaca
0.173479	0.573731	path:mmu05205	Human Diseases	Cancers	Proteoglycans in cancer	4	140	Actg1,Itgb1,Pik3cb,Prkaca
0.173861	0.573731	path:mmu05165	Human Diseases	Infectious diseases	Human papillomavirus infection	5	205	Itgb1,Pard3,Pik3cb,Ppp2cb,Prkaca
0.177844	0.573731	path:mmu04137	Cellular Processes	Transport and catabolism	Mitophagy - animal	2	44	Cited2,Csnk2a2
0.179009	0.573731	path:mmu05418	Human Diseases	Cardiovascular diseases	Fluid shear stress and atherosclerosis	3	90	Actg1,Map2k7,Pik3cb
0.181111	0.573731	path:mmu04390	Environmental Information Processing	Signal transduction	Hippo signaling pathway	3	91	Actg1,Pard3,Ppp2cb
0.182094	0.573731	path:mmu04750	Organismal Systems	Sensory system	Inflammatory mediator regulation of TRP channels	2	45	Pik3cb,Prkaca
0.187153	0.573731	path:mmu04310	Environmental Information Processing	Signal transduction	Wnt signaling pathway	3	94	Csnk2a2,Nfatc3,Prkaca
0.190329	0.573731	path:mmu05412	Human Diseases	Cardiovascular diseases	Arrhythmogenic right ventricular cardiomyopathy (ARVC)	2	47	Actg1,Itgb1
0.192019	0.573731	path:mmu00220	Metabolism	Amino acid metabolism	Arginine biosynthesis	1	11	Got2
0.192019	0.573731	path:mmu04975	Organismal Systems	Digestive system	Fat digestion and absorption	1	11	Got2
0.194125	0.573731	path:mmu04010	Environmental Information Processing	Signal transduction	MAPK signaling pathway	3	187	Map2k7,Nfatc3,Prkaca
0.194343	0.573731	path:mmu04151	Environmental Information Processing	Signal transduction	PI3K-Akt signaling pathway	4	205	Itgb1,Phlpp2,Pik3cb,Ppp2cb
0.198199	0.573731	path:mmu04620	Organismal Systems	Immune system	Toll-like receptor signaling pathway	2	49	Map2k7,Pik3cb
0.201992	0.573731	path:mmu00564	Metabolism	Lipid metabolism	Glycerophospholipid metabolism	2	50	Gnpat,Pnpla6
0.201992	0.573731	path:mmu04514	Environmental Information Processing	Signaling molecules and interaction	Cell adhesion molecules (CAMs)	2	50	Glg1,Itgb1
0.202807	0.573731	path:mmu05167	Human Diseases	Infectious diseases	Kaposi's sarcoma-associated herpesvirus infection	3	103	Map2k7,Nfatc3,Pik3cb
0.204942	0.573731	path:mmu00062	Metabolism	Lipid metabolism	Fatty acid elongation	1	12	Tecr
0.204942	0.573731	path:mmu01210	Mus Musculus	Metabolic pathways	2-Oxocarboxylic acid metabolism	1	12	Got2
0.204942	0.573731	path:mmu04940	Human Diseases	Endocrine and metabolic diseases	Type I diabetes mellitus	1	12	Cpe
0.20569	0.573731	path:mmu05410	Human Diseases	Cardiovascular diseases	Hypertrophic cardiomyopathy (HCM)	2	51	Actg1,Itgb1
0.209291	0.573731	path:mmu05142	Human Diseases	Infectious diseases	Chagas disease (American trypanosomiasis)	2	52	Pik3cb,Ppp2cb
0.212794	0.573731	path:mmu03008	Genetic Information Processing	Translation	Ribosome biogenesis in eukaryotes	2	53	Csnk2a2,Nob1
0.212794	0.573731	path:mmu04915	Organismal Systems	Endocrine system	Estrogen signaling pathway	2	53	Pik3cb,Prkaca
0.216198	0.573731	path:mmu05146	Human Diseases	Infectious diseases	Amoebiasis	2	54	Pik3cb,Prkaca
0.217215	0.573731	path:mmu00511	Metabolism	Glycan biosynthesis and metabolism	Other glycan degradation	1	13	Man2b1
0.217215	0.573731	path:mmu01040	Metabolism	Lipid metabolism	Biosynthesis of unsaturated fatty acids	1	13	Tecr
0.222707	0.573731	path:mmu04211	Organismal Systems	Aging	Longevity regulating pathway	2	56	Pik3cb,Prkaca
0.222707	0.573731	path:mmu04725	Organismal Systems	Nervous system	Cholinergic synapse	2	56	Pik3cb,Prkaca
0.223293	0.573731	path:mmu00230	Metabolism	Nucleotide metabolism	Purine metabolism	1	108	Aprt
0.223324	0.573731	path:mmu05225	Human Diseases	Cancers	Hepatocellular carcinoma	3	122	Actg1,Brd7,Pik3cb
0.228814	0.573731	path:mmu04012	Environmental Information Processing	Signal transduction	ErbB signaling pathway	2	58	Map2k7,Pik3cb
0.22886	0.573731	path:mmu00350	Metabolism	Amino acid metabolism	Tyrosine metabolism	1	14	Got2
0.22886	0.573731	path:mmu00531	Metabolism	Glycan biosynthesis and metabolism	Glycosaminoglycan degradation	1	14	Hgsnat
0.22886	0.573731	path:mmu03060	Genetic Information Processing	Folding, sorting and degradation	Protein export	1	14	Spcs3
0.22886	0.573731	path:mmu04742	Organismal Systems	Sensory system	Taste transduction	1	14	Prkaca
0.2387	0.573731	path:mmu04014	Environmental Information Processing	Signal transduction	Ras signaling pathway	2	130	Pik3cb,Prkaca
0.239818	0.573731	path:mmu01522	Human Diseases	Drug resistance	Endocrine resistance	2	62	Pik3cb,Prkaca
0.239898	0.573731	path:mmu00900	Metabolism	Metabolism of terpenoids and polyketides	Terpenoid backbone biosynthesis	1	15	Fnta
0.239898	0.573731	path:mmu04136	Cellular Processes	Transport and catabolism	Autophagy - other	1	15	Ppp2cb
0.242317	0.573731	path:mmu04728	Organismal Systems	Nervous system	Dopaminergic synapse	2	63	Ppp2cb,Prkaca
0.249219	0.573731	path:mmu05222	Human Diseases	Cancers	Small cell lung cancer	2	66	Itgb1,Pik3cb
0.250351	0.573731	path:mmu00380	Metabolism	Amino acid metabolism	Tryptophan metabolism	1	16	Gcdh
0.250351	0.573731	path:mmu05020	Human Diseases	Neurodegenerative diseases	Prion diseases	1	16	Prkaca
0.251322	0.573731	path:mmu04071	Environmental Information Processing	Signal transduction	Sphingolipid signaling pathway	2	67	Pik3cb,Ppp2cb
0.253328	0.573731	path:mmu01200	Mus Musculus	Metabolic pathways	Carbon metabolism	2	68	Gcsh,Got2
0.255237	0.573731	path:mmu04261	Organismal Systems	Circulatory system	Adrenergic signaling in cardiomyocytes	2	69	Ppp2cb,Prkaca
0.255237	0.573731	path:mmu05160	Human Diseases	Infectious diseases	Hepatitis C	2	69	Pik3cb,Ppp2cb
0.255237	0.573731	path:mmu05162	Human Diseases	Infectious diseases	Measles	2	69	Csnk2a2,Pik3cb
0.260238	0.573731	path:mmu00630	Metabolism	Carbohydrate metabolism	Glyoxylate and dicarboxylate metabolism	1	17	Gcsh
0.260238	0.573731	path:mmu04973	Organismal Systems	Digestive system	Carbohydrate digestion and absorption	1	17	Pik3cb
0.260394	0.573731	path:mmu04380	Organismal Systems	Development	Osteoclast differentiation	2	72	Map2k7,Pik3cb
0.261762	0.573731	path:mmu05224	Human Diseases	Cancers	Breast cancer	1	95	Pik3cb
0.261925	0.573731	path:mmu04722	Organismal Systems	Nervous system	Neurotrophin signaling pathway	2	73	Map2k7,Pik3cb
0.268228	0.573731	path:mmu04020	Environmental Information Processing	Signal transduction	Calcium signaling pathway	2	78	Prkaca,Slc25a4
0.269579	0.573731	path:mmu04740	Organismal Systems	Sensory system	Olfactory transduction	1	18	Prkaca
0.269579	0.573731	path:mmu04961	Organismal Systems	Excretory system	Endocrine and other factor-regulated calcium reabsorption	1	18	Prkaca
0.274053	0.573731	path:mmu04150	Environmental Information Processing	Signal transduction	mTOR signaling pathway	2	97	Pik3cb,Wdr59
0.274274	0.573731	path:mmu04210	Cellular Processes	Cell growth and death	Apoptosis	2	87	Actg1,Pik3cb
0.274559	0.573731	path:mmu04022	Environmental Information Processing	Signal transduction	cGMP-PKG signaling pathway	2	88	Nfatc3,Slc25a4
0.274559	0.573731	path:mmu04910	Organismal Systems	Endocrine system	Insulin signaling pathway	2	88	Pik3cb,Prkaca
0.274772	0.573731	path:mmu05161	Human Diseases	Infectious diseases	Hepatitis B	2	89	Nfatc3,Pik3cb
0.274772	0.573731	path:mmu05168	Human Diseases	Infectious diseases	Herpes simplex infection	2	89	Csnk2a2,Taf5l
0.274915	0.573731	path:mmu04024	Environmental Information Processing	Signal transduction	cAMP signaling pathway	2	90	Pik3cb,Prkaca
0.278392	0.573731	path:mmu04913	Organismal Systems	Endocrine system	Ovarian steroidogenesis	1	19	Prkaca
0.28298	0.573731	path:mmu04550	Cellular Processes	Cellular community - eukaryotes	Signaling pathways regulating pluripotency of stem cells	1	88	Pik3cb
0.286005	0.573731	path:mmu04068	Environmental Information Processing	Signal transduction	FoxO signaling pathway	1	87	Pik3cb
0.286697	0.573731	path:mmu04960	Organismal Systems	Excretory system	Aldosterone-regulated sodium reabsorption	1	20	Pik3cb
0.29451	0.573731	path:mmu05030	Human Diseases	Substance dependence	Cocaine addiction	1	21	Prkaca
0.303947	0.573731	path:mmu04072	Environmental Information Processing	Signal transduction	Phospholipase D signaling pathway	1	81	Pik3cb
0.308733	0.573731	path:mmu00250	Metabolism	Amino acid metabolism	Alanine, aspartate and glutamate metabolism	1	23	Got2
0.308733	0.573731	path:mmu00260	Metabolism	Amino acid metabolism	Glycine, serine and threonine metabolism	1	23	Gcsh
0.312697	0.573731	path:mmu05152	Human Diseases	Infectious diseases	Tuberculosis	1	78	Lamp1
0.315175	0.573731	path:mmu03460	Genetic Information Processing	Replication and repair	Fanconi anemia pathway	1	24	Fanca
0.315566	0.573731	path:mmu04371	Environmental Information Processing	Signal transduction	Apelin signaling pathway	1	77	Prkaca
0.315566	0.573731	path:mmu04630	Environmental Information Processing	Signal transduction	Jak-STAT signaling pathway	1	77	Pik3cb
0.321192	0.573731	path:mmu02010	Environmental Information Processing	Membrane transport	ABC transporters	1	25	Abcb10
0.321192	0.573731	path:mmu05416	Human Diseases	Cardiovascular diseases	Viral myocarditis	1	25	Actg1
0.326799	0.573731	path:mmu04930	Human Diseases	Endocrine and metabolic diseases	Type II diabetes mellitus	1	26	Pik3cb
0.326799	0.573731	path:mmu04976	Organismal Systems	Digestive system	Bile secretion	1	26	Prkaca
0.326799	0.573731	path:mmu05031	Human Diseases	Substance dependence	Amphetamine addiction	1	26	Prkaca
0.334702	0.573731	path:mmu04066	Environmental Information Processing	Signal transduction	HIF-1 signaling pathway	1	70	Pik3cb
0.334702	0.573731	path:mmu04933	Human Diseases	Endocrine and metabolic diseases	AGE-RAGE signaling pathway in diabetic complications	1	70	Pik3cb
0.336844	0.573731	path:mmu00310	Metabolism	Amino acid metabolism	Lysine degradation	1	28	Gcdh
0.336844	0.573731	path:mmu04971	Organismal Systems	Digestive system	Gastric acid secretion	1	28	Prkaca
0.337265	0.573731	path:mmu04931	Human Diseases	Endocrine and metabolic diseases	Insulin resistance	1	69	Pik3cb
0.339775	0.573731	path:mmu00240	Metabolism	Nucleotide metabolism	Pyrimidine metabolism	1	68	Dhodh
0.34131	0.573731	path:mmu00071	Metabolism	Lipid metabolism	Fatty acid degradation	1	29	Gcdh
0.34131	0.573731	path:mmu04972	Organismal Systems	Digestive system	Pancreatic secretion	1	29	Rab8a
0.34131	0.573731	path:mmu05133	Human Diseases	Infectious diseases	Pertussis	1	29	Itgb1
0.34131	0.573731	path:mmu05140	Human Diseases	Infectious diseases	Leishmaniasis	1	29	Itgb1
0.342229	0.573731	path:mmu05215	Human Diseases	Cancers	Prostate cancer	1	67	Pik3cb
0.345423	0.573731	path:mmu00330	Metabolism	Amino acid metabolism	Arginine and proline metabolism	1	30	Got2
0.345423	0.573731	path:mmu04730	Organismal Systems	Nervous system	Long-term depression	1	30	Ppp2cb
0.345423	0.573731	path:mmu04924	Organismal Systems	Endocrine system	Renin secretion	1	30	Prkaca
0.347549	0.573731	path:mmu04115	Cellular Processes	Cell growth and death	p53 signaling pathway	0	48
0.349197	0.573731	path:mmu04720	Organismal Systems	Nervous system	Long-term potentiation	1	31	Prkaca
0.351408	0.573731	path:mmu01521	Human Diseases	Drug resistance	EGFR tyrosine kinase inhibitor resistance	1	63	Pik3cb
0.352643	0.573731	path:mmu04340	Environmental Information Processing	Signal transduction	Hedgehog signaling pathway	1	32	Prkaca
0.353522	0.573731	path:mmu05145	Human Diseases	Infectious diseases	Toxoplasmosis	1	62	Itgb1
0.355556	0.573731	path:mmu05231	Human Diseases	Cancers	Choline metabolism in cancer	1	61	Pik3cb
0.355775	0.573731	path:mmu03050	Genetic Information Processing	Folding, sorting and degradation	Proteasome	1	33	Psmd7
0.355775	0.573731	path:mmu04911	Organismal Systems	Endocrine system	Insulin secretion	1	33	Prkaca
0.357505	0.573731	path:mmu04070	Environmental Information Processing	Signal transduction	Phosphatidylinositol signaling system	1	60	Pik3cb
0.357505	0.573731	path:mmu05220	Human Diseases	Cancers	Chronic myeloid leukemia	1	60	Pik3cb
0.358605	0.573731	path:mmu04970	Organismal Systems	Digestive system	Salivary secretion	1	34	Prkaca
0.359364	0.573731	path:mmu04270	Organismal Systems	Circulatory system	Vascular smooth muscle contraction	1	59	Prkaca
0.359364	0.573731	path:mmu05034	Human Diseases	Substance dependence	Alcoholism	1	59	Prkaca
0.361143	0.573731	path:mmu04260	Organismal Systems	Circulatory system	Cardiac muscle contraction	1	35	Cox4i1
0.363401	0.573731	path:mmu00480	Metabolism	Metabolism of other amino acids	Glutathione metabolism	1	36	Gsr
0.363401	0.573731	path:mmu01212	Mus Musculus	Metabolic pathways	Fatty acid metabolism	1	36	Tecr
0.363401	0.573731	path:mmu04370	Environmental Information Processing	Signal transduction	VEGF signaling pathway	1	36	Pik3cb
0.36435	0.573731	path:mmu04080	Environmental Information Processing	Signaling molecules and interaction	Neuroactive ligand-receptor interaction	1	56	Pard3
0.36435	0.573731	path:mmu04659	Organismal Systems	Immune system	Th17 cell differentiation	1	56	Nfatc3
0.36435	0.573731	path:mmu05212	Human Diseases	Cancers	Pancreatic cancer	1	56	Pik3cb
0.367129	0.573731	path:mmu05210	Human Diseases	Cancers	Colorectal cancer	1	54	Pik3cb
0.368337	0.573731	path:mmu04512	Environmental Information Processing	Signaling molecules and interaction	ECM-receptor interaction	1	53	Itgb1
0.368605	0.573731	path:mmu05213	Human Diseases	Cancers	Endometrial cancer	1	39	Pik3cb
0.369418	0.573731	path:mmu04666	Organismal Systems	Immune system	Fc gamma R-mediated phagocytosis	1	52	Pik3cb
0.369418	0.573731	path:mmu04724	Organismal Systems	Nervous system	Glutamatergic synapse	1	52	Prkaca
0.370867	0.573731	path:mmu00562	Metabolism	Carbohydrate metabolism	Inositol phosphate metabolism	1	41	Pik3cb
0.370867	0.573731	path:mmu04727	Organismal Systems	Nervous system	GABAergic synapse	1	41	Prkaca
0.370867	0.573731	path:mmu04925	Organismal Systems	Endocrine system	Aldosterone synthesis and secretion	1	41	Prkaca
0.370867	0.573731	path:mmu05230	Human Diseases	Cancers	Central carbon metabolism in cancer	1	41	Pik3cb
0.371167	0.573731	path:mmu01524	Human Diseases	Drug resistance	Platinum drug resistance	1	50	Pik3cb
0.371167	0.573731	path:mmu04146	Cellular Processes	Transport and catabolism	Peroxisome	1	50	Gnpat
0.371167	0.573731	path:mmu04916	Organismal Systems	Endocrine system	Melanogenesis	1	50	Prkaca
0.371824	0.573731	path:mmu04064	Environmental Information Processing	Signal transduction	NF-kappa B signaling pathway	1	49	Csnk2a2
0.371824	0.573731	path:mmu04922	Organismal Systems	Endocrine system	Glucagon signaling pathway	1	49	Prkaca
0.372251	0.573731	path:mmu04726	Organismal Systems	Nervous system	Serotonergic synapse	1	43	Prkaca
0.372251	0.573731	path:mmu05032	Human Diseases	Substance dependence	Morphine addiction	1	43	Prkaca
0.372325	0.573731	path:mmu04650	Organismal Systems	Immune system	Natural killer cell mediated cytotoxicity	1	48	Pik3cb
0.372665	0.573731	path:mmu04540	Cellular Processes	Cellular community - eukaryotes	Gap junction	1	47	Prkaca
0.372665	0.573731	path:mmu04658	Organismal Systems	Immune system	Th1 and Th2 cell differentiation	1	47	Nfatc3
0.372828	0.573731	path:mmu01230	Mus Musculus	Metabolic pathways	Biosynthesis of amino acids	1	45	Got2
0.372828	0.573731	path:mmu04713	Organismal Systems	Environmental adaptation	Circadian entrainment	1	45	Prkaca
0.372828	0.573731	path:mmu04917	Organismal Systems	Endocrine system	Prolactin signaling pathway	1	45	Pik3cb
0.372828	0.573731	path:mmu05218	Human Diseases	Cancers	Melanoma	1	45	Pik3cb
0.372828	0.573731	path:mmu05221	Human Diseases	Cancers	Acute myeloid leukemia	1	45	Pik3cb
0.372835	0.573731	path:mmu05211	Human Diseases	Cancers	Renal cell carcinoma	1	46	Pik3cb
0.372835	0.573731	path:mmu05214	Human Diseases	Cancers	Glioma	1	46	Pik3cb
0.372835	0.573731	path:mmu05223	Human Diseases	Cancers	Non-small cell lung cancer	1	46	Pik3cb
0.396751	0.604663	path:mmu04974	Organismal Systems	Digestive system	Protein digestion and absorption	0	42
0.396751	0.604663	path:mmu05217	Human Diseases	Cancers	Basal cell carcinoma	0	42
0.4056	0.609361	path:mmu03320	Organismal Systems	Endocrine system	PPAR signaling pathway	0	41
0.4056	0.609361	path:mmu04657	Organismal Systems	Immune system	IL-17 signaling pathway	0	41
0.4056	0.609361	path:mmu04920	Organismal Systems	Endocrine system	Adipocytokine signaling pathway	0	41
0.433343	0.64797	path:mmu05323	Human Diseases	Immune diseases	Rheumatoid arthritis	0	38
0.473292	0.704384	path:mmu00520	Metabolism	Carbohydrate metabolism	Amino sugar and nucleotide sugar metabolism	0	34
0.494621	0.725902	path:mmu00280	Metabolism	Amino acid metabolism	Valine, leucine and isoleucine degradation	0	32
0.494621	0.725902	path:mmu00561	Metabolism	Lipid metabolism	Glycerolipid metabolism	0	32
0.494621	0.725902	path:mmu04640	Organismal Systems	Immune system	Hematopoietic cell lineage	0	32
0.505641	0.735267	path:mmu04330	Environmental Information Processing	Signal transduction	Notch signaling pathway	0	31
0.505641	0.735267	path:mmu04623	Organismal Systems	Immune system	Cytosolic DNA-sensing pathway	0	31
0.516905	0.744813	path:mmu00010	Metabolism	Carbohydrate metabolism	Glycolysis / Gluconeogenesis	0	30
0.516905	0.744813	path:mmu04622	Organismal Systems	Immune system	RIG-I-like receptor signaling pathway	0	30
0.528419	0.747808	path:mmu00510	Metabolism	Glycan biosynthesis and metabolism	N-Glycan biosynthesis	0	29
0.528419	0.747808	path:mmu04216	Cellular Processes	Cell growth and death	Ferroptosis	0	29
0.528419	0.747808	path:mmu04721	Organismal Systems	Nervous system	Synaptic vesicle cycle	0	29
0.528419	0.747808	path:mmu05014	Human Diseases	Neurodegenerative diseases	Amyotrophic lateral sclerosis (ALS)	0	29
0.540189	0.761066	path:mmu05219	Human Diseases	Cancers	Bladder cancer	0	28
0.564515	0.784875	path:mmu04612	Organismal Systems	Immune system	Antigen processing and presentation	0	26
0.564515	0.784875	path:mmu05134	Human Diseases	Infectious diseases	Legionellosis	0	26
0.564515	0.784875	path:mmu05321	Human Diseases	Immune diseases	Inflammatory bowel disease (IBD)	0	26
0.577085	0.79193	path:mmu00600	Metabolism	Lipid metabolism	Sphingolipid metabolism	0	25
0.577085	0.79193	path:mmu00980	Metabolism	Xenobiotics biodegradation and metabolism	Metabolism of xenobiotics by cytochrome P450	0	25
0.577085	0.79193	path:mmu05204	Human Diseases	Cancers	Chemical carcinogenesis	0	25
0.589932	0.802612	path:mmu03020	Genetic Information Processing	Transcription	RNA polymerase	0	24
0.589932	0.802612	path:mmu05322	Human Diseases	Immune diseases	Systemic lupus erythematosus	0	24
0.603065	0.810049	path:mmu00620	Metabolism	Carbohydrate metabolism	Pyruvate metabolism	0	23
0.603065	0.810049	path:mmu03440	Genetic Information Processing	Replication and repair	Homologous recombination	0	23
0.603065	0.810049	path:mmu05216	Human Diseases	Cancers	Thyroid cancer	0	23
0.616488	0.82112	path:mmu00590	Metabolism	Lipid metabolism	Arachidonic acid metabolism	0	22
0.616488	0.82112	path:mmu04978	Organismal Systems	Digestive system	Mineral absorption	0	22
0.630208	0.828946	path:mmu00860	Metabolism	Metabolism of cofactors and vitamins	Porphyrin and chlorophyll metabolism	0	21
0.630208	0.828946	path:mmu01523	Human Diseases	Drug resistance	Antifolate resistance	0	21
0.630208	0.828946	path:mmu05144	Human Diseases	Infectious diseases	Malaria	0	21
0.644233	0.833558	path:mmu00020	Metabolism	Carbohydrate metabolism	Citrate cycle (TCA cycle)	0	20
0.644233	0.833558	path:mmu00410	Metabolism	Metabolism of other amino acids	beta-Alanine metabolism	0	20
0.644233	0.833558	path:mmu00982	Metabolism	Xenobiotics biodegradation and metabolism	Drug metabolism - cytochrome P450	0	20
0.644233	0.833558	path:mmu04610	Organismal Systems	Immune system	Complement and coagulation cascades	0	20
0.658567	0.835063	path:mmu00052	Metabolism	Carbohydrate metabolism	Galactose metabolism	0	19
0.658567	0.835063	path:mmu00640	Metabolism	Carbohydrate metabolism	Propanoate metabolism	0	19
0.658567	0.835063	path:mmu00983	Metabolism	Xenobiotics biodegradation and metabolism	Drug metabolism - other enzymes	0	19
0.658567	0.835063	path:mmu03410	Genetic Information Processing	Replication and repair	Base excision repair	0	19
0.658567	0.835063	path:mmu04710	Organismal Systems	Environmental adaptation	Circadian rhythm	0	19
0.67322	0.846867	path:mmu04130	Genetic Information Processing	Folding, sorting and degradation	SNARE interactions in vesicular transport	0	18
0.67322	0.846867	path:mmu04215	Cellular Processes	Cell growth and death	Apoptosis - multiple species	0	18
0.688196	0.85218	path:mmu00051	Metabolism	Carbohydrate metabolism	Fructose and mannose metabolism	0	17
0.688196	0.85218	path:mmu00532	Metabolism	Glycan biosynthesis and metabolism	Glycosaminoglycan biosynthesis - chondroitin sulfate / dermatan sulfate	0	17
0.688196	0.85218	path:mmu00565	Metabolism	Lipid metabolism	Ether lipid metabolism	0	17
0.688196	0.85218	path:mmu04392	Environmental Information Processing	Signal transduction	Hippo signaling pathway - multiple species	0	17
0.703504	0.861046	path:mmu00500	Metabolism	Carbohydrate metabolism	Starch and sucrose metabolism	0	16
0.703504	0.861046	path:mmu00512	Metabolism	Glycan biosynthesis and metabolism	Mucin type O-glycan biosynthesis	0	16
0.703504	0.861046	path:mmu00563	Metabolism	Glycan biosynthesis and metabolism	Glycosylphosphatidylinositol (GPI)-anchor biosynthesis	0	16
0.719151	0.870118	path:mmu00030	Metabolism	Carbohydrate metabolism	Pentose phosphate pathway	0	15
0.719151	0.870118	path:mmu00534	Metabolism	Glycan biosynthesis and metabolism	Glycosaminoglycan biosynthesis - heparan sulfate / heparin	0	15
0.719151	0.870118	path:mmu00830	Metabolism	Metabolism of cofactors and vitamins	Retinol metabolism	0	15
0.735144	0.886087	path:mmu00601	Metabolism	Glycan biosynthesis and metabolism	Glycosphingolipid biosynthesis - lacto and neolacto series	0	14
0.751492	0.889745	path:mmu00100	Metabolism	Lipid metabolism	Steroid biosynthesis	0	13
0.751492	0.889745	path:mmu00670	Metabolism	Metabolism of cofactors and vitamins	One carbon pool by folate	0	13
0.751492	0.889745	path:mmu00760	Metabolism	Metabolism of cofactors and vitamins	Nicotinate and nicotinamide metabolism	0	13
0.7682	0.889745	path:mmu00514	Metabolism	Glycan biosynthesis and metabolism	Other types of O-glycan biosynthesis	0	12
0.785279	0.889745	path:mmu00040	Metabolism	Carbohydrate metabolism	Pentose and glucuronate interconversions	0	11
0.785279	0.889745	path:mmu00061	Metabolism	Lipid metabolism	Fatty acid biosynthesis	0	11
0.785279	0.889745	path:mmu00340	Metabolism	Amino acid metabolism	Histidine metabolism	0	11
0.785279	0.889745	path:mmu00650	Metabolism	Carbohydrate metabolism	Butanoate metabolism	0	11
0.785279	0.889745	path:mmu04614	Organismal Systems	Endocrine system	Renin-angiotensin system	0	11
0.785279	0.889745	path:mmu04672	Organismal Systems	Immune system	Intestinal immune network for IgA production	0	11
0.785279	0.889745	path:mmu04966	Organismal Systems	Excretory system	Collecting duct acid secretion	0	11
0.785279	0.889745	path:mmu05143	Human Diseases	Infectious diseases	African trypanosomiasis	0	11
0.785279	0.889745	path:mmu05340	Human Diseases	Immune diseases	Primary immunodeficiency	0	11
0.802735	0.889745	path:mmu00140	Metabolism	Lipid metabolism	Steroid hormone biosynthesis	0	10
0.802735	0.889745	path:mmu00515	Metabolism	Glycan biosynthesis and metabolism	Mannose type O-glycan biosynthesis	0	10
0.802735	0.889745	path:mmu00533	Metabolism	Glycan biosynthesis and metabolism	Glycosaminoglycan biosynthesis - keratan sulfate	0	10
0.802735	0.889745	path:mmu00604	Metabolism	Glycan biosynthesis and metabolism	Glycosphingolipid biosynthesis - ganglio series	0	10
0.802735	0.889745	path:mmu00730	Metabolism	Metabolism of cofactors and vitamins	Thiamine metabolism	0	10
0.802735	0.889745	path:mmu00790	Metabolism	Metabolism of cofactors and vitamins	Folate biosynthesis	0	10
0.802735	0.889745	path:mmu03430	Genetic Information Processing	Replication and repair	Mismatch repair	0	10
0.802735	0.889745	path:mmu04964	Organismal Systems	Excretory system	Proximal tubule bicarbonate reclamation	0	10
0.802735	0.889745	path:mmu04977	Organismal Systems	Digestive system	Vitamin digestion and absorption	0	10
0.802735	0.889745	path:mmu05033	Human Diseases	Substance dependence	Nicotine addiction	0	10
0.820578	0.893894	path:mmu00120	Metabolism	Lipid metabolism	Primary bile acid biosynthesis	0	9
0.820578	0.893894	path:mmu00130	Metabolism	Metabolism of cofactors and vitamins	Ubiquinone and other terpenoid-quinone biosynthesis	0	9
0.820578	0.893894	path:mmu05150	Human Diseases	Infectious diseases	Staphylococcus aureus infection	0	9
0.820578	0.893894	path:mmu05320	Human Diseases	Immune diseases	Autoimmune thyroid disease	0	9
0.820578	0.893894	path:mmu05332	Human Diseases	Immune diseases	Graft-versus-host disease	0	9
0.838815	0.904436	path:mmu00450	Metabolism	Metabolism of other amino acids	Selenocompound metabolism	0	8
0.838815	0.904436	path:mmu00592	Metabolism	Lipid metabolism	alpha-Linolenic acid metabolism	0	8
0.838815	0.904436	path:mmu05330	Human Diseases	Immune diseases	Allograft rejection	0	8
0.857455	0.912125	path:mmu00053	Metabolism	Carbohydrate metabolism	Ascorbate and aldarate metabolism	0	7
0.857455	0.912125	path:mmu00603	Metabolism	Glycan biosynthesis and metabolism	Glycosphingolipid biosynthesis - globo and isoglobo series	0	7
0.857455	0.912125	path:mmu00770	Metabolism	Metabolism of cofactors and vitamins	Pantothenate and CoA biosynthesis	0	7
0.857455	0.912125	path:mmu00910	Metabolism	Energy metabolism	Nitrogen metabolism	0	7
0.876507	0.917006	path:mmu00072	Metabolism	Lipid metabolism	Synthesis and degradation of ketone bodies	0	6
0.876507	0.917006	path:mmu00750	Metabolism	Metabolism of cofactors and vitamins	Vitamin B6 metabolism	0	6
0.876507	0.917006	path:mmu00920	Metabolism	Energy metabolism	Sulfur metabolism	0	6
0.876507	0.917006	path:mmu03450	Genetic Information Processing	Replication and repair	Non-homologous end-joining	0	6
0.876507	0.917006	path:mmu04122	Genetic Information Processing	Folding, sorting and degradation	Sulfur relay system	0	6
0.895981	0.922162	path:mmu00430	Metabolism	Metabolism of other amino acids	Taurine and hypotaurine metabolism	0	5
0.895981	0.922162	path:mmu00440	Metabolism	Metabolism of other amino acids	Phosphonate and phosphinate metabolism	0	5
0.895981	0.922162	path:mmu00591	Metabolism	Lipid metabolism	Linoleic acid metabolism	0	5
0.895981	0.922162	path:mmu00740	Metabolism	Metabolism of cofactors and vitamins	Riboflavin metabolism	0	5
0.895981	0.922162	path:mmu04744	Organismal Systems	Sensory system	Phototransduction	0	5
0.915885	0.939598	path:mmu04950	Human Diseases	Endocrine and metabolic diseases	Maturity onset diabetes of the young	0	4
0.957023	0.966167	path:mmu00232	Metabolism	Biosynthesis of other secondary metabolites	Caffeine metabolism	0	2
0.957023	0.966167	path:mmu00471	Metabolism	Metabolism of other amino acids	D-Glutamine and D-glutamate metabolism	0	2
0.957023	0.966167	path:mmu00524	Metabolism	Biosynthesis of other secondary metabolites	Neomycin, kanamycin and gentamicin biosynthesis	0	2
0.957023	0.966167	path:mmu00785	Metabolism	Metabolism of cofactors and vitamins	Lipoic acid metabolism	0	2
0.957023	0.966167	path:mmu05310	Human Diseases	Immune diseases	Asthma	0	2
0.978277	0.981373	path:mmu00290	Metabolism	Amino acid metabolism	Valine, leucine and isoleucine biosynthesis	0	1
0.978277	0.981373	path:mmu00780	Metabolism	Metabolism of cofactors and vitamins	Biotin metabolism	0	1
1	1	path:mmu00472	Metabolism	Metabolism of other amino acids	D-Arginine and D-ornithine metabolism	0	0

## Sheet: KEGG_module_4
pv	pv_fdr	term	Brite1	Brite2	kegg_name	hits	BG	Symbols
0.00162866	0.413727	path:mmu00970	Genetic Information Processing	Translation	Aminoacyl-tRNA biosynthesis	4	34	Hars,Hars2,Lars,Nars
0.00261027	0.413727	path:mmu03040	Genetic Information Processing	Transcription	Spliceosome	5	64	Rbm22,Snrpd1,Thoc1,Txnl4a,Zmat2
0.0114454	0.820036	path:mmu03013	Genetic Information Processing	Translation	RNA transport	5	93	Eif1a,Elac1,Phax,Seh1l,Thoc1
0.0180509	0.820036	path:mmu03060	Genetic Information Processing	Folding, sorting and degradation	Protein export	2	14	Sec11c,Srp19
0.0347853	0.820036	path:mmu03015	Genetic Information Processing	Translation	mRNA surveillance pathway	3	50	Etf1,Rnmt,Wdr33
0.0380338	0.820036	path:mmu04670	Organismal Systems	Immune system	Leukocyte transendothelial migration	3	52	Ctnna1,Ptpn11,Rock1
0.0392509	0.820036	path:mmu04390	Environmental Information Processing	Signal transduction	Hippo signaling pathway	4	91	Apc,Ctnna1,Smad2,Smad4
0.0397002	0.820036	path:mmu04520	Cellular Processes	Cellular community - eukaryotes	Adherens junction	3	53	Ctnna1,Smad2,Smad4
0.0413936	0.820036	path:mmu05210	Human Diseases	Cancers	Colorectal cancer	3	54	Apc,Smad2,Smad4
0.0448577	0.820036	path:mmu04350	Environmental Information Processing	Signal transduction	TGF-beta signaling pathway	3	56	Rock1,Smad2,Smad4
0.074507	0.820036	path:mmu04340	Environmental Information Processing	Signal transduction	Hedgehog signaling pathway	2	32	Csnk1a1,Csnk1g3
0.0801072	0.820036	path:mmu05225	Human Diseases	Cancers	Hepatocellular carcinoma	4	122	Apc,Csnk1a1,Smad2,Smad4
0.0856485	0.820036	path:mmu04110	Cellular Processes	Cell growth and death	Cell cycle	3	77	Cdc23,Smad2,Smad4
0.0856485	0.820036	path:mmu04371	Environmental Information Processing	Signal transduction	Apelin signaling pathway	3	77	Pik3c3,Smad2,Smad4
0.0856485	0.820036	path:mmu04630	Environmental Information Processing	Signal transduction	Jak-STAT signaling pathway	3	77	Ptpn11,Ptpn2,Socs6
0.0930892	0.820036	path:mmu05200	Human Diseases	Cancers	Pathways in cancer	6	244	Apc,Ctnna1,Cul2,Rock1,Smad2,Smad4
0.0998885	0.820036	path:mmu05213	Human Diseases	Cancers	Endometrial cancer	2	39	Apc,Ctnna1
0.105947	0.820036	path:mmu05205	Human Diseases	Cancers	Proteoglycans in cancer	4	140	Hbegf,Ptpn11,Rock1,Smad2
0.108421	0.820036	path:mmu04550	Cellular Processes	Cellular community - eukaryotes	Signaling pathways regulating pluripotency of stem cells	3	88	Apc,Smad2,Smad4
0.1108	0.820036	path:mmu04912	Organismal Systems	Endocrine system	GnRH signaling pathway	2	42	Hbegf,Map3k2
0.120712	0.820036	path:mmu04310	Environmental Information Processing	Signal transduction	Wnt signaling pathway	3	94	Apc,Csnk1a1,Smad4
0.12322	0.820036	path:mmu00120	Metabolism	Lipid metabolism	Primary bile acid biosynthesis	1	9	Hsd17b4
0.12322	0.820036	path:mmu00130	Metabolism	Metabolism of cofactors and vitamins	Ubiquinone and other terpenoid-quinone biosynthesis	1	9	Coq2
0.124577	0.820036	path:mmu01100	Mus Musculus	Metabolic pathways	Metabolic pathways	11	691	Acaa2,Atp5a1,B4galt6,Cndp2,Coq2,Fech,Galnt1,Hsd17b4,Ndst1,Pik3c3,Sord
0.125194	0.820036	path:mmu05211	Human Diseases	Cancers	Renal cell carcinoma	2	46	Cul2,Ptpn11
0.128749	0.820036	path:mmu04540	Cellular Processes	Cellular community - eukaryotes	Gap junction	2	47	Map3k2,Tubb6
0.129495	0.820036	path:mmu04144	Cellular Processes	Transport and catabolism	Endocytosis	4	157	Bin1,Chmp1b,Kif5b,Smad2
0.129509	0.820036	path:mmu04151	Environmental Information Processing	Signal transduction	PI3K-Akt signaling pathway	1	205	Ngf
0.133449	0.820036	path:mmu05166	Human Diseases	Infectious diseases	HTLV-I infection	4	160	Apc,Cdc23,Smad2,Smad4
0.145996	0.820036	path:mmu00040	Metabolism	Carbohydrate metabolism	Pentose and glucuronate interconversions	1	11	Sord
0.145996	0.820036	path:mmu00340	Metabolism	Amino acid metabolism	Histidine metabolism	1	11	Cndp2
0.14685	0.820036	path:mmu05169	Human Diseases	Infectious diseases	Epstein-Barr virus infection	0	122
0.149556	0.820036	path:mmu03008	Genetic Information Processing	Translation	Ribosome biogenesis in eukaryotes	2	53	Tcof1,Wdr36
0.156251	0.820036	path:mmu03018	Genetic Information Processing	Folding, sorting and degradation	RNA degradation	2	55	Dcp2,Hspa9
0.156813	0.820036	path:mmu00062	Metabolism	Lipid metabolism	Fatty acid elongation	1	12	Acaa2
0.156813	0.820036	path:mmu04940	Human Diseases	Endocrine and metabolic diseases	Type I diabetes mellitus	1	12	Ptprn
0.159546	0.820036	path:mmu04659	Organismal Systems	Immune system	Th17 cell differentiation	2	56	Smad2,Smad4
0.159546	0.820036	path:mmu05212	Human Diseases	Cancers	Pancreatic cancer	2	56	Smad2,Smad4
0.172348	0.820036	path:mmu05220	Human Diseases	Cancers	Chronic myeloid leukemia	2	60	Ptpn11,Smad4
0.183245	0.820036	path:mmu00230	Metabolism	Nucleotide metabolism	Purine metabolism	0	108
0.18709	0.820036	path:mmu00534	Metabolism	Glycan biosynthesis and metabolism	Glycosaminoglycan biosynthesis - heparan sulfate / heparin	1	15	Ndst1
0.18709	0.820036	path:mmu04136	Cellular Processes	Transport and catabolism	Autophagy - other	1	15	Pik3c3
0.196485	0.820036	path:mmu00512	Metabolism	Glycan biosynthesis and metabolism	Mucin type O-glycan biosynthesis	1	16	Galnt1
0.201358	0.820036	path:mmu04933	Human Diseases	Endocrine and metabolic diseases	AGE-RAGE signaling pathway in diabetic complications	2	70	Smad2,Smad4
0.205546	0.820036	path:mmu00051	Metabolism	Carbohydrate metabolism	Fructose and mannose metabolism	1	17	Sord
0.206599	0.820036	path:mmu04145	Cellular Processes	Transport and catabolism	Phagosome	2	72	Pik3c3,Tubb6
0.209145	0.820036	path:mmu04722	Organismal Systems	Nervous system	Neurotrophin signaling pathway	2	73	Ngf,Ptpn11
0.221131	0.820036	path:mmu04120	Genetic Information Processing	Folding, sorting and degradation	Ubiquitin mediated proteolysis	2	78	Cdc23,Cul2
0.221131	0.820036	path:mmu05152	Human Diseases	Infectious diseases	Tuberculosis	2	78	Hspa9,Pik3c3
0.225005	0.820036	path:mmu04932	Human Diseases	Endocrine and metabolic diseases	Non-alcoholic fatty liver disease (NAFLD)	0	95
0.22684	0.820036	path:mmu05165	Human Diseases	Infectious diseases	Human papillomavirus infection	3	205	Apc,Csnk1a1,Hdac3
0.228584	0.820036	path:mmu03010	Genetic Information Processing	Translation	Ribosome	0	94
0.2308	0.820036	path:mmu00410	Metabolism	Metabolism of other amino acids	beta-Alanine metabolism	1	20	Cndp2
0.2308	0.820036	path:mmu03022	Genetic Information Processing	Transcription	Basal transcription factors	1	20	Ercc3
0.2308	0.820036	path:mmu04962	Organismal Systems	Excretory system	Vasopressin-regulated water reabsorption	1	20	Dctn4
0.233141	0.820036	path:mmu04010	Environmental Information Processing	Signal transduction	MAPK signaling pathway	2	187	Map3k2,Ngf
0.238601	0.820036	path:mmu00860	Metabolism	Metabolism of cofactors and vitamins	Porphyrin and chlorophyll metabolism	1	21	Fech
0.239511	0.820036	path:mmu04068	Environmental Information Processing	Signal transduction	FoxO signaling pathway	2	87	Smad2,Smad4
0.239511	0.820036	path:mmu04210	Cellular Processes	Cell growth and death	Apoptosis	2	87	Lmnb1,Ngf
0.241299	0.820036	path:mmu04142	Cellular Processes	Transport and catabolism	Lysosome	2	88	Ap3s1,Npc1
0.243474	0.820036	path:mmu05418	Human Diseases	Cardiovascular diseases	Fluid shear stress and atherosclerosis	0	90
0.251276	0.820036	path:mmu04910	Organismal Systems	Endocrine system	Insulin signaling pathway	0	88
0.252409	0.820036	path:mmu05224	Human Diseases	Cancers	Breast cancer	2	95	Apc,Csnk1a1
0.253322	0.820036	path:mmu00620	Metabolism	Carbohydrate metabolism	Pyruvate metabolism	1	23	Me2
0.253322	0.820036	path:mmu03440	Genetic Information Processing	Replication and repair	Homologous recombination	1	23	Rbbp8
0.253798	0.820036	path:mmu05016	Human Diseases	Neurodegenerative diseases	Huntington's disease	2	96	Atp5a1,Dctn4
0.255269	0.820036	path:mmu04060	Environmental Information Processing	Signaling molecules and interaction	Cytokine-cytokine receptor interaction	0	87
0.255269	0.820036	path:mmu04621	Organismal Systems	Immune system	NOD-like receptor signaling pathway	0	87
0.260257	0.820036	path:mmu03420	Genetic Information Processing	Replication and repair	Nucleotide excision repair	1	24	Ercc3
0.260257	0.820036	path:mmu05322	Human Diseases	Immune diseases	Systemic lupus erythematosus	1	24	Snrpd1
0.265934	0.820036	path:mmu05206	Human Diseases	Cancers	MicroRNAs in cancer	2	107	Apc,Rock1
0.266377	0.820036	path:mmu04510	Cellular Processes	Cellular community - eukaryotes	Focal adhesion	1	131	Rock1
0.266916	0.820036	path:mmu00600	Metabolism	Lipid metabolism	Sphingolipid metabolism	1	25	B4galt6
0.271884	0.820036	path:mmu05164	Human Diseases	Infectious diseases	Influenza A	0	83
0.273308	0.820036	path:mmu05321	Human Diseases	Immune diseases	Inflammatory bowel disease (IBD)	1	26	Smad2
0.274132	0.820036	path:mmu04810	Cellular Processes	Cell motility	Regulation of actin cytoskeleton	2	123	Apc,Rock1
0.274336	0.820036	path:mmu04360	Organismal Systems	Development	Axon guidance	2	133	Ptpn11,Rock1
0.274631	0.820036	path:mmu04014	Environmental Information Processing	Signal transduction	Ras signaling pathway	2	130	Ngf,Ptpn11
0.275015	0.820036	path:mmu04015	Environmental Information Processing	Signal transduction	Rap1 signaling pathway	1	127	Ngf
0.285313	0.820036	path:mmu05219	Human Diseases	Cancers	Bladder cancer	1	28	Hbegf
0.289573	0.820036	path:mmu04152	Environmental Information Processing	Signal transduction	AMPK signaling pathway	0	79
0.29094	0.820036	path:mmu00071	Metabolism	Lipid metabolism	Fatty acid degradation	1	29	Acaa2
0.294171	0.820036	path:mmu04020	Environmental Information Processing	Signal transduction	Calcium signaling pathway	0	78
0.296324	0.820036	path:mmu00330	Metabolism	Amino acid metabolism	Arginine and proline metabolism	1	30	Cndp2
0.303585	0.820036	path:mmu04668	Environmental Information Processing	Signal transduction	TNF signaling pathway	0	76
0.306391	0.820036	path:mmu00280	Metabolism	Amino acid metabolism	Valine, leucine and isoleucine degradation	1	32	Acaa2
0.311138	0.820036	path:mmu04141	Genetic Information Processing	Folding, sorting and degradation	Protein processing in endoplasmic reticulum	1	110	Lman1
0.313187	0.820036	path:mmu05203	Human Diseases	Cancers	Viral carcinogenesis	1	109	Hdac3
0.323211	0.820036	path:mmu04218	Cellular Processes	Cell growth and death	Cellular senescence	1	104	Smad2
0.323321	0.820036	path:mmu04380	Organismal Systems	Development	Osteoclast differentiation	0	72
0.323875	0.820036	path:mmu01212	Mus Musculus	Metabolic pathways	Fatty acid metabolism	1	36	Acaa2
0.325165	0.820036	path:mmu05167	Human Diseases	Infectious diseases	Kaposi's sarcoma-associated herpesvirus infection	1	103	Pik3c3
0.328451	0.820036	path:mmu04723	Organismal Systems	Nervous system	Retrograde endocannabinoid signaling	0	71
0.330903	0.820036	path:mmu05202	Human Diseases	Cancers	Transcriptional misregulation in cancer	1	100	Ss18
0.334616	0.820036	path:mmu05010	Human Diseases	Neurodegenerative diseases	Alzheimer's disease	1	98	Atp5a1
0.336434	0.820036	path:mmu04150	Environmental Information Processing	Signal transduction	mTOR signaling pathway	1	97	Seh1l
0.338955	0.820036	path:mmu04261	Organismal Systems	Circulatory system	Adrenergic signaling in cardiomyocytes	0	69
0.338955	0.820036	path:mmu05160	Human Diseases	Infectious diseases	Hepatitis C	0	69
0.338955	0.820036	path:mmu05162	Human Diseases	Infectious diseases	Measles	0	69
0.341217	0.820036	path:mmu00562	Metabolism	Carbohydrate metabolism	Inositol phosphate metabolism	1	41	Pik3c3
0.341217	0.820036	path:mmu04920	Organismal Systems	Endocrine system	Adipocytokine signaling pathway	1	41	Ptpn11
0.341217	0.820036	path:mmu05132	Human Diseases	Infectious diseases	Salmonella infection	1	41	Rock1
0.344135	0.820036	path:mmu05217	Human Diseases	Cancers	Basal cell carcinoma	1	42	Apc
0.344331	0.820036	path:mmu00240	Metabolism	Nucleotide metabolism	Pyrimidine metabolism	0	68
0.346742	0.820036	path:mmu04530	Cellular Processes	Cellular community - eukaryotes	Tight junction	1	91	Rock1
0.348346	0.820036	path:mmu04024	Environmental Information Processing	Signal transduction	cAMP signaling pathway	1	90	Rock1
0.349792	0.820036	path:mmu05215	Human Diseases	Cancers	Prostate cancer	0	67
0.349914	0.820036	path:mmu05161	Human Diseases	Infectious diseases	Hepatitis B	1	89	Smad4
0.349914	0.820036	path:mmu05168	Human Diseases	Infectious diseases	Herpes simplex infection	1	89	Ptpn11
0.351444	0.820036	path:mmu04022	Environmental Information Processing	Signal transduction	cGMP-PKG signaling pathway	1	88	Rock1
0.351444	0.820036	path:mmu04062	Organismal Systems	Immune system	Chemokine signaling pathway	1	88	Rock1
0.351871	0.820036	path:mmu04750	Organismal Systems	Sensory system	Inflammatory mediator regulation of TRP channels	1	45	Ngf
0.351871	0.820036	path:mmu04917	Organismal Systems	Endocrine system	Prolactin signaling pathway	1	45	Socs6
0.355338	0.820036	path:mmu05222	Human Diseases	Cancers	Small cell lung cancer	0	66
0.356227	0.820036	path:mmu05412	Human Diseases	Cardiovascular diseases	Arrhythmogenic right ventricular cardiomyopathy (ARVC)	1	47	Ctnna1
0.358177	0.820036	path:mmu04650	Organismal Systems	Immune system	Natural killer cell mediated cytotoxicity	1	48	Ptpn11
0.360954	0.820036	path:mmu04072	Environmental Information Processing	Signal transduction	Phospholipase D signaling pathway	1	81	Ptpn11
0.360954	0.820036	path:mmu04140	Cellular Processes	Transport and catabolism	Autophagy - animal	1	81	Pik3c3
0.361643	0.820036	path:mmu04146	Cellular Processes	Transport and catabolism	Peroxisome	1	50	Hsd17b4
0.36212	0.820036	path:mmu04919	Organismal Systems	Endocrine system	Thyroid hormone signaling pathway	1	80	Hdac3
0.36212	0.820036	path:mmu04926	Organismal Systems	Endocrine system	Relaxin signaling pathway	1	80	Smad2
0.363167	0.820036	path:mmu05100	Human Diseases	Infectious diseases	Bacterial invasion of epithelial cells	1	51	Ctnna1
0.364556	0.820036	path:mmu04666	Organismal Systems	Immune system	Fc gamma R-mediated phagocytosis	1	52	Bin1
0.364556	0.820036	path:mmu04914	Organismal Systems	Endocrine system	Progesterone-mediated oocyte maturation	1	52	Cdc23
0.364556	0.820036	path:mmu05142	Human Diseases	Infectious diseases	Chagas disease (American trypanosomiasis)	1	52	Smad2
0.36529	0.820036	path:mmu04217	Cellular Processes	Cell growth and death	Necroptosis	1	77	Chmp1b
0.365814	0.820036	path:mmu04915	Organismal Systems	Endocrine system	Estrogen signaling pathway	1	53	Hbegf
0.36623	0.820036	path:mmu04921	Organismal Systems	Endocrine system	Oxytocin signaling pathway	1	76	Rock1
0.367108	0.820036	path:mmu05012	Human Diseases	Neurodegenerative diseases	Parkinson's disease	1	75	Atp5a1
0.367922	0.820036	path:mmu00190	Metabolism	Energy metabolism	Oxidative phosphorylation	1	74	Atp5a1
0.368842	0.820036	path:mmu04080	Environmental Information Processing	Signaling molecules and interaction	Neuroactive ligand-receptor interaction	1	56	Nr3c1
0.370274	0.820036	path:mmu04012	Environmental Information Processing	Signal transduction	ErbB signaling pathway	1	58	Hbegf
0.370495	0.820036	path:mmu04066	Environmental Information Processing	Signal transduction	HIF-1 signaling pathway	1	70	Cul2
0.370823	0.820036	path:mmu04270	Organismal Systems	Circulatory system	Vascular smooth muscle contraction	1	59	Rock1
0.370823	0.820036	path:mmu05034	Human Diseases	Substance dependence	Alcoholism	1	59	Hdac3
0.370956	0.820036	path:mmu04931	Human Diseases	Endocrine and metabolic diseases	Insulin resistance	1	69	Ptpn11
0.371266	0.820036	path:mmu04070	Environmental Information Processing	Signal transduction	Phosphatidylinositol signaling system	1	60	Pik3c3
0.371338	0.820036	path:mmu01200	Mus Musculus	Metabolic pathways	Carbon metabolism	1	68	Me2
0.371639	0.820036	path:mmu04071	Environmental Information Processing	Signal transduction	Sphingolipid signaling pathway	1	67	Rock1
0.371844	0.820036	path:mmu01522	Human Diseases	Drug resistance	Endocrine resistance	1	62	Hbegf
0.371986	0.820036	path:mmu04114	Cellular Processes	Cell growth and death	Oocyte meiosis	1	63	Cdc23
0.371986	0.820036	path:mmu04611	Organismal Systems	Immune system	Platelet activation	1	63	Rock1
0.371986	0.820036	path:mmu04728	Organismal Systems	Nervous system	Dopaminergic synapse	1	63	Kif5b
0.372509	0.820036	path:mmu01521	Human Diseases	Drug resistance	EGFR tyrosine kinase inhibitor resistance	0	63
0.378413	0.827289	path:mmu05145	Human Diseases	Infectious diseases	Toxoplasmosis	0	62
0.384411	0.834645	path:mmu05231	Human Diseases	Cancers	Choline metabolism in cancer	0	61
0.415844	0.890693	path:mmu04211	Organismal Systems	Aging	Longevity regulating pathway	0	56
0.415844	0.890693	path:mmu04725	Organismal Systems	Nervous system	Cholinergic synapse	0	56
0.42912	0.912961	path:mmu05146	Human Diseases	Infectious diseases	Amoebiasis	0	54
0.435916	0.913949	path:mmu04512	Environmental Information Processing	Signaling molecules and interaction	ECM-receptor interaction	0	53
0.442818	0.913949	path:mmu04724	Organismal Systems	Nervous system	Glutamatergic synapse	0	52
0.442818	0.913949	path:mmu05414	Human Diseases	Cardiovascular diseases	Dilated cardiomyopathy (DCM)	0	52
0.449829	0.913949	path:mmu04660	Organismal Systems	Immune system	T cell receptor signaling pathway	0	51
0.449829	0.913949	path:mmu05410	Human Diseases	Cardiovascular diseases	Hypertrophic cardiomyopathy (HCM)	0	51
0.456949	0.913949	path:mmu00564	Metabolism	Lipid metabolism	Glycerophospholipid metabolism	0	50
0.456949	0.913949	path:mmu01524	Human Diseases	Drug resistance	Platinum drug resistance	0	50
0.456949	0.913949	path:mmu04514	Environmental Information Processing	Signaling molecules and interaction	Cell adhesion molecules (CAMs)	0	50
0.456949	0.913949	path:mmu04916	Organismal Systems	Endocrine system	Melanogenesis	0	50
0.464182	0.913949	path:mmu04064	Environmental Information Processing	Signal transduction	NF-kappa B signaling pathway	0	49
0.464182	0.913949	path:mmu04620	Organismal Systems	Immune system	Toll-like receptor signaling pathway	0	49
0.464182	0.913949	path:mmu04922	Organismal Systems	Endocrine system	Glucagon signaling pathway	0	49
0.471529	0.922683	path:mmu04115	Cellular Processes	Cell growth and death	p53 signaling pathway	0	48
0.478991	0.927119	path:mmu04658	Organismal Systems	Immune system	Th1 and Th2 cell differentiation	0	47
0.48657	0.927119	path:mmu05214	Human Diseases	Cancers	Glioma	0	46
0.48657	0.927119	path:mmu05223	Human Diseases	Cancers	Non-small cell lung cancer	0	46
0.494269	0.927119	path:mmu01230	Mus Musculus	Metabolic pathways	Biosynthesis of amino acids	0	45
0.494269	0.927119	path:mmu04713	Organismal Systems	Environmental adaptation	Circadian entrainment	0	45
0.494269	0.927119	path:mmu05218	Human Diseases	Cancers	Melanoma	0	45
0.494269	0.927119	path:mmu05221	Human Diseases	Cancers	Acute myeloid leukemia	0	45
0.502088	0.936246	path:mmu04137	Cellular Processes	Transport and catabolism	Mitophagy - animal	0	44
0.51003	0.937271	path:mmu04726	Organismal Systems	Nervous system	Serotonergic synapse	0	43
0.51003	0.937271	path:mmu05032	Human Diseases	Substance dependence	Morphine addiction	0	43
0.518097	0.937271	path:mmu04974	Organismal Systems	Digestive system	Protein digestion and absorption	0	42
0.526291	0.937271	path:mmu03320	Organismal Systems	Endocrine system	PPAR signaling pathway	0	41
0.526291	0.937271	path:mmu04657	Organismal Systems	Immune system	IL-17 signaling pathway	0	41
0.526291	0.937271	path:mmu04727	Organismal Systems	Nervous system	GABAergic synapse	0	41
0.526291	0.937271	path:mmu04925	Organismal Systems	Endocrine system	Aldosterone synthesis and secretion	0	41
0.526291	0.937271	path:mmu05230	Human Diseases	Cancers	Central carbon metabolism in cancer	0	41
0.534613	0.946773	path:mmu04662	Organismal Systems	Immune system	B cell receptor signaling pathway	0	40
0.543066	0.948007	path:mmu04213	Organismal Systems	Aging	Longevity regulating pathway - multiple species	0	39
0.551652	0.948007	path:mmu05323	Human Diseases	Immune diseases	Rheumatoid arthritis	0	38
0.56923	0.948007	path:mmu00480	Metabolism	Metabolism of other amino acids	Glutathione metabolism	0	36
0.56923	0.948007	path:mmu04370	Environmental Information Processing	Signal transduction	VEGF signaling pathway	0	36
0.578227	0.948007	path:mmu04260	Organismal Systems	Circulatory system	Cardiac muscle contraction	0	35
0.587364	0.948007	path:mmu00520	Metabolism	Carbohydrate metabolism	Amino sugar and nucleotide sugar metabolism	0	34
0.587364	0.948007	path:mmu04923	Organismal Systems	Endocrine system	Regulation of lipolysis in adipocytes	0	34
0.587364	0.948007	path:mmu04970	Organismal Systems	Digestive system	Salivary secretion	0	34
0.596646	0.948007	path:mmu03050	Genetic Information Processing	Folding, sorting and degradation	Proteasome	0	33
0.596646	0.948007	path:mmu04911	Organismal Systems	Endocrine system	Insulin secretion	0	33
0.606072	0.948007	path:mmu00561	Metabolism	Lipid metabolism	Glycerolipid metabolism	0	32
0.606072	0.948007	path:mmu04640	Organismal Systems	Immune system	Hematopoietic cell lineage	0	32
0.615647	0.948007	path:mmu04330	Environmental Information Processing	Signal transduction	Notch signaling pathway	0	31
0.615647	0.948007	path:mmu04623	Organismal Systems	Immune system	Cytosolic DNA-sensing pathway	0	31
0.615647	0.948007	path:mmu04720	Organismal Systems	Nervous system	Long-term potentiation	0	31
0.625372	0.948007	path:mmu00010	Metabolism	Carbohydrate metabolism	Glycolysis / Gluconeogenesis	0	30
0.625372	0.948007	path:mmu04622	Organismal Systems	Immune system	RIG-I-like receptor signaling pathway	0	30
0.625372	0.948007	path:mmu04664	Organismal Systems	Immune system	Fc epsilon RI signaling pathway	0	30
0.625372	0.948007	path:mmu04730	Organismal Systems	Nervous system	Long-term depression	0	30
0.625372	0.948007	path:mmu04918	Organismal Systems	Endocrine system	Thyroid hormone synthesis	0	30
0.625372	0.948007	path:mmu04924	Organismal Systems	Endocrine system	Renin secretion	0	30
0.635249	0.948007	path:mmu00510	Metabolism	Glycan biosynthesis and metabolism	N-Glycan biosynthesis	0	29
0.635249	0.948007	path:mmu04216	Cellular Processes	Cell growth and death	Ferroptosis	0	29
0.635249	0.948007	path:mmu04721	Organismal Systems	Nervous system	Synaptic vesicle cycle	0	29
0.635249	0.948007	path:mmu04972	Organismal Systems	Digestive system	Pancreatic secretion	0	29
0.635249	0.948007	path:mmu05014	Human Diseases	Neurodegenerative diseases	Amyotrophic lateral sclerosis (ALS)	0	29
0.635249	0.948007	path:mmu05133	Human Diseases	Infectious diseases	Pertussis	0	29
0.635249	0.948007	path:mmu05140	Human Diseases	Infectious diseases	Leishmaniasis	0	29
0.645282	0.948007	path:mmu00310	Metabolism	Amino acid metabolism	Lysine degradation	0	28
0.645282	0.948007	path:mmu04971	Organismal Systems	Digestive system	Gastric acid secretion	0	28
0.665821	0.948007	path:mmu04612	Organismal Systems	Immune system	Antigen processing and presentation	0	26
0.665821	0.948007	path:mmu04930	Human Diseases	Endocrine and metabolic diseases	Type II diabetes mellitus	0	26
0.665821	0.948007	path:mmu04976	Organismal Systems	Digestive system	Bile secretion	0	26
0.665821	0.948007	path:mmu05031	Human Diseases	Substance dependence	Amphetamine addiction	0	26
0.665821	0.948007	path:mmu05134	Human Diseases	Infectious diseases	Legionellosis	0	26
0.676333	0.948007	path:mmu00270	Metabolism	Amino acid metabolism	Cysteine and methionine metabolism	0	25
0.676333	0.948007	path:mmu00980	Metabolism	Xenobiotics biodegradation and metabolism	Metabolism of xenobiotics by cytochrome P450	0	25
0.676333	0.948007	path:mmu02010	Environmental Information Processing	Membrane transport	ABC transporters	0	25
0.676333	0.948007	path:mmu05204	Human Diseases	Cancers	Chemical carcinogenesis	0	25
0.676333	0.948007	path:mmu05416	Human Diseases	Cardiovascular diseases	Viral myocarditis	0	25
0.68701	0.948007	path:mmu03020	Genetic Information Processing	Transcription	RNA polymerase	0	24
0.68701	0.948007	path:mmu03460	Genetic Information Processing	Replication and repair	Fanconi anemia pathway	0	24
0.697854	0.948007	path:mmu00250	Metabolism	Amino acid metabolism	Alanine, aspartate and glutamate metabolism	0	23
0.697854	0.948007	path:mmu00260	Metabolism	Amino acid metabolism	Glycine, serine and threonine metabolism	0	23
0.697854	0.948007	path:mmu05216	Human Diseases	Cancers	Thyroid cancer	0	23
0.708868	0.948007	path:mmu00590	Metabolism	Lipid metabolism	Arachidonic acid metabolism	0	22
0.708868	0.948007	path:mmu03030	Genetic Information Processing	Replication and repair	DNA replication	0	22
0.708868	0.948007	path:mmu04978	Organismal Systems	Digestive system	Mineral absorption	0	22
0.720054	0.948007	path:mmu01523	Human Diseases	Drug resistance	Antifolate resistance	0	21
0.720054	0.948007	path:mmu05030	Human Diseases	Substance dependence	Cocaine addiction	0	21
0.720054	0.948007	path:mmu05144	Human Diseases	Infectious diseases	Malaria	0	21
0.731416	0.948007	path:mmu00020	Metabolism	Carbohydrate metabolism	Citrate cycle (TCA cycle)	0	20
0.731416	0.948007	path:mmu00982	Metabolism	Xenobiotics biodegradation and metabolism	Drug metabolism - cytochrome P450	0	20
0.731416	0.948007	path:mmu04610	Organismal Systems	Immune system	Complement and coagulation cascades	0	20
0.731416	0.948007	path:mmu04960	Organismal Systems	Excretory system	Aldosterone-regulated sodium reabsorption	0	20
0.742956	0.948007	path:mmu00052	Metabolism	Carbohydrate metabolism	Galactose metabolism	0	19
0.742956	0.948007	path:mmu00640	Metabolism	Carbohydrate metabolism	Propanoate metabolism	0	19
0.742956	0.948007	path:mmu00983	Metabolism	Xenobiotics biodegradation and metabolism	Drug metabolism - other enzymes	0	19
0.742956	0.948007	path:mmu03410	Genetic Information Processing	Replication and repair	Base excision repair	0	19
0.742956	0.948007	path:mmu04710	Organismal Systems	Environmental adaptation	Circadian rhythm	0	19
0.742956	0.948007	path:mmu04913	Organismal Systems	Endocrine system	Ovarian steroidogenesis	0	19
0.754677	0.948007	path:mmu04130	Genetic Information Processing	Folding, sorting and degradation	SNARE interactions in vesicular transport	0	18
0.754677	0.948007	path:mmu04215	Cellular Processes	Cell growth and death	Apoptosis - multiple species	0	18
0.754677	0.948007	path:mmu04740	Organismal Systems	Sensory system	Olfactory transduction	0	18
0.754677	0.948007	path:mmu04961	Organismal Systems	Excretory system	Endocrine and other factor-regulated calcium reabsorption	0	18
0.766582	0.948007	path:mmu00532	Metabolism	Glycan biosynthesis and metabolism	Glycosaminoglycan biosynthesis - chondroitin sulfate / dermatan sulfate	0	17
0.766582	0.948007	path:mmu00565	Metabolism	Lipid metabolism	Ether lipid metabolism	0	17
0.766582	0.948007	path:mmu00630	Metabolism	Carbohydrate metabolism	Glyoxylate and dicarboxylate metabolism	0	17
0.766582	0.948007	path:mmu04392	Environmental Information Processing	Signal transduction	Hippo signaling pathway - multiple species	0	17
0.766582	0.948007	path:mmu04973	Organismal Systems	Digestive system	Carbohydrate digestion and absorption	0	17
0.778673	0.948007	path:mmu00380	Metabolism	Amino acid metabolism	Tryptophan metabolism	0	16
0.778673	0.948007	path:mmu00500	Metabolism	Carbohydrate metabolism	Starch and sucrose metabolism	0	16
0.778673	0.948007	path:mmu00563	Metabolism	Glycan biosynthesis and metabolism	Glycosylphosphatidylinositol (GPI)-anchor biosynthesis	0	16
0.778673	0.948007	path:mmu05020	Human Diseases	Neurodegenerative diseases	Prion diseases	0	16
0.790953	0.948007	path:mmu00030	Metabolism	Carbohydrate metabolism	Pentose phosphate pathway	0	15
0.790953	0.948007	path:mmu00830	Metabolism	Metabolism of cofactors and vitamins	Retinol metabolism	0	15
0.790953	0.948007	path:mmu00900	Metabolism	Metabolism of terpenoids and polyketides	Terpenoid backbone biosynthesis	0	15
0.803426	0.948007	path:mmu00350	Metabolism	Amino acid metabolism	Tyrosine metabolism	0	14
0.803426	0.948007	path:mmu00531	Metabolism	Glycan biosynthesis and metabolism	Glycosaminoglycan degradation	0	14
0.803426	0.948007	path:mmu00601	Metabolism	Glycan biosynthesis and metabolism	Glycosphingolipid biosynthesis - lacto and neolacto series	0	14
0.803426	0.948007	path:mmu04742	Organismal Systems	Sensory system	Taste transduction	0	14
0.816093	0.948007	path:mmu00100	Metabolism	Lipid metabolism	Steroid biosynthesis	0	13
0.816093	0.948007	path:mmu00511	Metabolism	Glycan biosynthesis and metabolism	Other glycan degradation	0	13
0.816093	0.948007	path:mmu00670	Metabolism	Metabolism of cofactors and vitamins	One carbon pool by folate	0	13
0.816093	0.948007	path:mmu00760	Metabolism	Metabolism of cofactors and vitamins	Nicotinate and nicotinamide metabolism	0	13
0.816093	0.948007	path:mmu01040	Metabolism	Lipid metabolism	Biosynthesis of unsaturated fatty acids	0	13
0.82896	0.948007	path:mmu00514	Metabolism	Glycan biosynthesis and metabolism	Other types of O-glycan biosynthesis	0	12
0.82896	0.948007	path:mmu01210	Mus Musculus	Metabolic pathways	2-Oxocarboxylic acid metabolism	0	12
0.842028	0.948007	path:mmu00061	Metabolism	Lipid metabolism	Fatty acid biosynthesis	0	11
0.842028	0.948007	path:mmu00220	Metabolism	Amino acid metabolism	Arginine biosynthesis	0	11
0.842028	0.948007	path:mmu00650	Metabolism	Carbohydrate metabolism	Butanoate metabolism	0	11
0.842028	0.948007	path:mmu04614	Organismal Systems	Endocrine system	Renin-angiotensin system	0	11
0.842028	0.948007	path:mmu04672	Organismal Systems	Immune system	Intestinal immune network for IgA production	0	11
0.842028	0.948007	path:mmu04966	Organismal Systems	Excretory system	Collecting duct acid secretion	0	11
0.842028	0.948007	path:mmu04975	Organismal Systems	Digestive system	Fat digestion and absorption	0	11
0.842028	0.948007	path:mmu05143	Human Diseases	Infectious diseases	African trypanosomiasis	0	11
0.842028	0.948007	path:mmu05340	Human Diseases	Immune diseases	Primary immunodeficiency	0	11
0.8553	0.948007	path:mmu00140	Metabolism	Lipid metabolism	Steroid hormone biosynthesis	0	10
0.8553	0.948007	path:mmu00515	Metabolism	Glycan biosynthesis and metabolism	Mannose type O-glycan biosynthesis	0	10
0.8553	0.948007	path:mmu00533	Metabolism	Glycan biosynthesis and metabolism	Glycosaminoglycan biosynthesis - keratan sulfate	0	10
0.8553	0.948007	path:mmu00604	Metabolism	Glycan biosynthesis and metabolism	Glycosphingolipid biosynthesis - ganglio series	0	10
0.8553	0.948007	path:mmu00730	Metabolism	Metabolism of cofactors and vitamins	Thiamine metabolism	0	10
0.8553	0.948007	path:mmu00790	Metabolism	Metabolism of cofactors and vitamins	Folate biosynthesis	0	10
0.8553	0.948007	path:mmu03430	Genetic Information Processing	Replication and repair	Mismatch repair	0	10
0.8553	0.948007	path:mmu04964	Organismal Systems	Excretory system	Proximal tubule bicarbonate reclamation	0	10
0.8553	0.948007	path:mmu04977	Organismal Systems	Digestive system	Vitamin digestion and absorption	0	10
0.8553	0.948007	path:mmu05033	Human Diseases	Substance dependence	Nicotine addiction	0	10
0.86878	0.952953	path:mmu05150	Human Diseases	Infectious diseases	Staphylococcus aureus infection	0	9
0.86878	0.952953	path:mmu05320	Human Diseases	Immune diseases	Autoimmune thyroid disease	0	9
0.86878	0.952953	path:mmu05332	Human Diseases	Immune diseases	Graft-versus-host disease	0	9
0.882471	0.954756	path:mmu00360	Metabolism	Amino acid metabolism	Phenylalanine metabolism	0	8
0.882471	0.954756	path:mmu00450	Metabolism	Metabolism of other amino acids	Selenocompound metabolism	0	8
0.882471	0.954756	path:mmu00592	Metabolism	Lipid metabolism	alpha-Linolenic acid metabolism	0	8
0.882471	0.954756	path:mmu05330	Human Diseases	Immune diseases	Allograft rejection	0	8
0.896377	0.954969	path:mmu00053	Metabolism	Carbohydrate metabolism	Ascorbate and aldarate metabolism	0	7
0.896377	0.954969	path:mmu00603	Metabolism	Glycan biosynthesis and metabolism	Glycosphingolipid biosynthesis - globo and isoglobo series	0	7
0.896377	0.954969	path:mmu00770	Metabolism	Metabolism of cofactors and vitamins	Pantothenate and CoA biosynthesis	0	7
0.896377	0.954969	path:mmu00910	Metabolism	Energy metabolism	Nitrogen metabolism	0	7
0.9105	0.954969	path:mmu00072	Metabolism	Lipid metabolism	Synthesis and degradation of ketone bodies	0	6
0.9105	0.954969	path:mmu00750	Metabolism	Metabolism of cofactors and vitamins	Vitamin B6 metabolism	0	6
0.9105	0.954969	path:mmu00920	Metabolism	Energy metabolism	Sulfur metabolism	0	6
0.9105	0.954969	path:mmu03450	Genetic Information Processing	Replication and repair	Non-homologous end-joining	0	6
0.9105	0.954969	path:mmu04122	Genetic Information Processing	Folding, sorting and degradation	Sulfur relay system	0	6
0.924844	0.954969	path:mmu00430	Metabolism	Metabolism of other amino acids	Taurine and hypotaurine metabolism	0	5
0.924844	0.954969	path:mmu00440	Metabolism	Metabolism of other amino acids	Phosphonate and phosphinate metabolism	0	5
0.924844	0.954969	path:mmu00591	Metabolism	Lipid metabolism	Linoleic acid metabolism	0	5
0.924844	0.954969	path:mmu00740	Metabolism	Metabolism of cofactors and vitamins	Riboflavin metabolism	0	5
0.924844	0.954969	path:mmu04744	Organismal Systems	Sensory system	Phototransduction	0	5
0.939412	0.966862	path:mmu04950	Human Diseases	Endocrine and metabolic diseases	Maturity onset diabetes of the young	0	4
0.969236	0.978496	path:mmu00232	Metabolism	Biosynthesis of other secondary metabolites	Caffeine metabolism	0	2
0.969236	0.978496	path:mmu00400	Metabolism	Amino acid metabolism	Phenylalanine, tyrosine and tryptophan biosynthesis	0	2
0.969236	0.978496	path:mmu00471	Metabolism	Metabolism of other amino acids	D-Glutamine and D-glutamate metabolism	0	2
0.969236	0.978496	path:mmu00524	Metabolism	Biosynthesis of other secondary metabolites	Neomycin, kanamycin and gentamicin biosynthesis	0	2
0.969236	0.978496	path:mmu00785	Metabolism	Metabolism of cofactors and vitamins	Lipoic acid metabolism	0	2
0.969236	0.978496	path:mmu05310	Human Diseases	Immune diseases	Asthma	0	2
0.984499	0.987614	path:mmu00290	Metabolism	Amino acid metabolism	Valine, leucine and isoleucine biosynthesis	0	1
0.984499	0.987614	path:mmu00780	Metabolism	Metabolism of cofactors and vitamins	Biotin metabolism	0	1
1	1	path:mmu00472	Metabolism	Metabolism of other amino acids	D-Arginine and D-ornithine metabolism	0	0

## Sheet: KEGG_module_5
pv	pv_fdr	term	Brite1	Brite2	kegg_name	hits	BG	Symbols
0.00138884	0.440261	path:mmu05168	Human Diseases	Infectious diseases	Herpes simplex infection	7	89	Cdc34,Cdk1,Cdk2,Hcfc2,Ifngr1,Tab2,Tbk1
0.00695166	0.602511	path:mmu05230	Human Diseases	Cancers	Central carbon metabolism in cancer	4	41	Hk1,Map2k2,Pfkl,Sirt6
0.00928313	0.602511	path:mmu04066	Environmental Information Processing	Signal transduction	HIF-1 signaling pathway	5	70	Hk1,Ifngr1,Map2k2,Mknk2,Pfkl
0.01747	0.602511	path:mmu04614	Organismal Systems	Endocrine system	Renin-angiotensin system	2	11	Prep,Thop1
0.0190724	0.602511	path:mmu04623	Organismal Systems	Immune system	Cytosolic DNA-sensing pathway	3	31	Polr2e,Polr3b,Tbk1
0.0220524	0.602511	path:mmu05161	Human Diseases	Infectious diseases	Hepatitis B	5	89	Apaf1,Cdk2,Map2k2,Stat6,Tbk1
0.0222083	0.602511	path:mmu05169	Human Diseases	Infectious diseases	Epstein-Barr virus infection	6	122	Cdk1,Cdk2,Polr2e,Polr3b,Tab2,Tbk1
0.025555	0.602511	path:mmu03013	Genetic Information Processing	Translation	RNA transport	5	93	Eif4ebp2,Nup107,Nup43,Ranbp2,Xpot
0.0331251	0.602511	path:mmu01200	Mus Musculus	Metabolic pathways	Carbon metabolism	4	68	Cs,Hk1,Pfkl,Shmt2
0.0344875	0.602511	path:mmu05162	Human Diseases	Infectious diseases	Measles	4	69	Cdk2,Ifngr1,Tab2,Tbk1
0.0365433	0.602511	path:mmu04218	Cellular Processes	Cell growth and death	Cellular senescence	5	104	Cdk1,Cdk2,Map2k2,Sirt1,Traf3ip2
0.037235	0.602511	path:mmu00562	Metabolism	Carbohydrate metabolism	Inositol phosphate metabolism	3	41	Ipmk,Pip4k2c,Pip5k1c
0.037235	0.602511	path:mmu04657	Organismal Systems	Immune system	IL-17 signaling pathway	3	41	Tab2,Tbk1,Traf3ip2
0.0382601	0.602511	path:mmu00524	Metabolism	Biosynthesis of other secondary metabolites	Neomycin, kanamycin and gentamicin biosynthesis	1	2	Hk1
0.0384254	0.602511	path:mmu00051	Metabolism	Carbohydrate metabolism	Fructose and mannose metabolism	2	17	Hk1,Pfkl
0.0384254	0.602511	path:mmu00630	Metabolism	Carbohydrate metabolism	Glyoxylate and dicarboxylate metabolism	2	17	Cs,Shmt2
0.0401759	0.602511	path:mmu04722	Organismal Systems	Nervous system	Neurotrophin signaling pathway	4	73	Frs2,Map2k2,Prdm4,Rap1b
0.0416182	0.602511	path:mmu05166	Human Diseases	Infectious diseases	HTLV-I infection	0	160
0.0458521	0.602511	path:mmu01230	Mus Musculus	Metabolic pathways	Biosynthesis of amino acids	3	45	Cs,Pfkl,Shmt2
0.0464642	0.602511	path:mmu00052	Metabolism	Carbohydrate metabolism	Galactose metabolism	2	19	Hk1,Pfkl
0.0477783	0.602511	path:mmu05152	Human Diseases	Infectious diseases	Tuberculosis	4	78	Apaf1,Eea1,Ifngr1,Rab5b
0.0503941	0.602511	path:mmu04540	Cellular Processes	Cellular community - eukaryotes	Gap junction	3	47	Cdk1,Gja1,Map2k2
0.0527169	0.602511	path:mmu04115	Cellular Processes	Cell growth and death	p53 signaling pathway	3	48	Apaf1,Cdk1,Cdk2
0.0527198	0.602511	path:mmu04144	Cellular Processes	Transport and catabolism	Endocytosis	6	157	Eea1,Pip5k1c,Rab5b,Rnf41,Vps26a,Vta1
0.0548759	0.602511	path:mmu01523	Human Diseases	Drug resistance	Antifolate resistance	2	21	Shmt2,Slc19a1
0.0550718	0.602511	path:mmu04620	Organismal Systems	Immune system	Toll-like receptor signaling pathway	3	49	Map2k2,Tab2,Tbk1
0.0635796	0.602511	path:mmu05216	Human Diseases	Cancers	Thyroid cancer	2	23	Ccdc6,Map2k2
0.0643063	0.602511	path:mmu04142	Cellular Processes	Transport and catabolism	Lysosome	4	88	Ap3d1,Cd164,Gns,Psap
0.0677752	0.602511	path:mmu04024	Environmental Information Processing	Signal transduction	cAMP signaling pathway	4	90	Atp2b1,Map2k2,Ppp1r12a,Rap1b
0.0680179	0.602511	path:mmu03020	Genetic Information Processing	Transcription	RNA polymerase	2	24	Polr2e,Polr3b
0.0714413	0.602511	path:mmu04360	Organismal Systems	Development	Axon guidance	0	133
0.0770242	0.602511	path:mmu05134	Human Diseases	Infectious diseases	Legionellosis	2	26	Apaf1,Hbs1l
0.0770242	0.602511	path:mmu05321	Human Diseases	Immune diseases	Inflammatory bowel disease (IBD)	2	26	Ifngr1,Stat6
0.0784018	0.602511	path:mmu05016	Human Diseases	Neurodegenerative diseases	Huntington's disease	4	96	Apaf1,Atp5d,Polr2e,Tfam
0.0825491	0.602511	path:mmu04070	Environmental Information Processing	Signal transduction	Phosphatidylinositol signaling system	3	60	Ipmk,Pip4k2c,Pip5k1c
0.0851421	0.602511	path:mmu05231	Human Diseases	Cancers	Choline metabolism in cancer	3	61	Chpt1,Map2k2,Pip5k1c
0.0861514	0.602511	path:mmu05219	Human Diseases	Cancers	Bladder cancer	2	28	Dapk3,Map2k2
0.090188	0.602511	path:mmu00440	Metabolism	Metabolism of other amino acids	Phosphonate and phosphinate metabolism	1	5	Chpt1
0.090742	0.602511	path:mmu04972	Organismal Systems	Digestive system	Pancreatic secretion	2	29	Atp2b1,Rap1b
0.090742	0.602511	path:mmu05140	Human Diseases	Infectious diseases	Leishmaniasis	2	29	Ifngr1,Tab2
0.0953417	0.602511	path:mmu00010	Metabolism	Carbohydrate metabolism	Glycolysis / Gluconeogenesis	2	30	Hk1,Pfkl
0.0999439	0.602511	path:mmu04720	Organismal Systems	Nervous system	Long-term potentiation	2	31	Map2k2,Rap1b
0.110163	0.602511	path:mmu01100	Mus Musculus	Metabolic pathways	Metabolic pathways	14	691	Atp5d,Chpt1,Cs,Galnt4,Gns,Hk1,Ipmk,Lta4h,Pfkl,Pip5k1c,Polr2e,Polr3b,Rev3l,Shmt2
0.113833	0.602511	path:mmu04145	Cellular Processes	Transport and catabolism	Phagosome	3	72	Eea1,Rab5b,Stx7
0.121548	0.602511	path:mmu05012	Human Diseases	Neurodegenerative diseases	Parkinson's disease	3	75	Apaf1,Atp5d,Ube2g2
0.126568	0.602511	path:mmu04810	Cellular Processes	Cell motility	Regulation of actin cytoskeleton	4	123	Map2k2,Pip4k2c,Pip5k1c,Ppp1r12a
0.129145	0.602511	path:mmu04120	Genetic Information Processing	Folding, sorting and degradation	Ubiquitin mediated proteolysis	3	78	Cdc34,Herc4,Ube2g2
0.136058	0.602511	path:mmu00450	Metabolism	Metabolism of other amino acids	Selenocompound metabolism	1	8	Mars
0.136198	0.602511	path:mmu04213	Organismal Systems	Aging	Longevity regulating pathway - multiple species	2	39	Eif4ebp2,Sirt1
0.13812	0.602511	path:mmu04014	Environmental Information Processing	Signal transduction	Ras signaling pathway	4	130	Map2k2,Rab5b,Rap1b,Tbk1
0.141453	0.602511	path:mmu05164	Human Diseases	Infectious diseases	Influenza A	3	83	Ifngr1,Map2k2,Tbk1
0.14502	0.602511	path:mmu04151	Environmental Information Processing	Signal transduction	PI3K-Akt signaling pathway	2	205	Cdk2,Map2k2
0.150905	0.602511	path:mmu04068	Environmental Information Processing	Signal transduction	FoxO signaling pathway	3	87	Cdk2,Map2k2,Sirt1
0.150905	0.602511	path:mmu04210	Cellular Processes	Cell growth and death	Apoptosis	3	87	Apaf1,Lmnb2,Map2k2
0.152428	0.602511	path:mmu04932	Human Diseases	Endocrine and metabolic diseases	Non-alcoholic fatty liver disease (NAFLD)	0	95
0.153205	0.602511	path:mmu04022	Environmental Information Processing	Signal transduction	cGMP-PKG signaling pathway	3	88	Atp2b1,Map2k2,Ppp1r12a
0.153205	0.602511	path:mmu04910	Organismal Systems	Endocrine system	Insulin signaling pathway	3	88	Hk1,Map2k2,Mknk2
0.155492	0.602511	path:mmu04310	Environmental Information Processing	Signal transduction	Wnt signaling pathway	0	94
0.157668	0.602511	path:mmu04137	Cellular Processes	Transport and catabolism	Mitophagy - animal	2	44	Tbc1d15,Tbk1
0.163531	0.602511	path:mmu04977	Organismal Systems	Digestive system	Vitamin digestion and absorption	1	10	Slc19a1
0.165055	0.602511	path:mmu04530	Cellular Processes	Cellular community - eukaryotes	Tight junction	0	91
0.165877	0.602511	path:mmu05211	Human Diseases	Cancers	Renal cell carcinoma	2	46	Map2k2,Rap1b
0.168371	0.602511	path:mmu05418	Human Diseases	Cardiovascular diseases	Fluid shear stress and atherosclerosis	0	90
0.16989	0.602511	path:mmu04658	Organismal Systems	Immune system	Th1 and Th2 cell differentiation	2	47	Ifngr1,Stat6
0.173838	0.602511	path:mmu04650	Organismal Systems	Immune system	Natural killer cell mediated cytotoxicity	2	48	Ifngr1,Map2k2
0.174599	0.602511	path:mmu05010	Human Diseases	Neurodegenerative diseases	Alzheimer's disease	3	98	Apaf1,Atp5d,Lrp1
0.17639	0.602511	path:mmu05143	Human Diseases	Infectious diseases	African trypanosomiasis	1	11	Thop1
0.17772	0.602511	path:mmu04922	Organismal Systems	Endocrine system	Glucagon signaling pathway	2	49	Pfkl,Sirt1
0.178617	0.602511	path:mmu05200	Human Diseases	Cancers	Pathways in cancer	5	244	Bcr,Ccdc6,Cdk2,Dapk3,Map2k2
0.181534	0.602511	path:mmu01524	Human Diseases	Drug resistance	Platinum drug resistance	2	50	Apaf1,Rev3l
0.184077	0.602511	path:mmu05167	Human Diseases	Infectious diseases	Kaposi's sarcoma-associated herpesvirus infection	3	103	Ifngr1,Map2k2,Tbk1
0.188687	0.602511	path:mmu00514	Metabolism	Glycan biosynthesis and metabolism	Other types of O-glycan biosynthesis	1	12	Pofut2
0.188687	0.602511	path:mmu01210	Mus Musculus	Metabolic pathways	2-Oxocarboxylic acid metabolism	1	12	Cs
0.188951	0.602511	path:mmu04914	Organismal Systems	Endocrine system	Progesterone-mediated oocyte maturation	2	52	Cdk1,Cdk2
0.19255	0.602511	path:mmu03008	Genetic Information Processing	Translation	Ribosome biogenesis in eukaryotes	2	53	Pwp2,Rexo1
0.196261	0.602511	path:mmu04010	Environmental Information Processing	Signal transduction	MAPK signaling pathway	4	187	Map2k2,Mknk2,Rap1b,Tab2
0.197426	0.602511	path:mmu05165	Human Diseases	Infectious diseases	Human papillomavirus infection	3	205	Cdk2,Map2k2,Tbk1
0.199526	0.602511	path:mmu03018	Genetic Information Processing	Folding, sorting and degradation	RNA degradation	2	55	Cnot2,Pfkl
0.20044	0.602511	path:mmu00670	Metabolism	Metabolism of cofactors and vitamins	One carbon pool by folate	1	13	Shmt2
0.202899	0.602511	path:mmu04659	Organismal Systems	Immune system	Th17 cell differentiation	2	56	Ifngr1,Stat6
0.211664	0.602511	path:mmu00531	Metabolism	Glycan biosynthesis and metabolism	Glycosaminoglycan degradation	1	14	Gns
0.211704	0.602511	path:mmu05225	Human Diseases	Cancers	Hepatocellular carcinoma	3	122	Map2k2,Smarcb1,Smarcc2
0.212553	0.602511	path:mmu04270	Organismal Systems	Circulatory system	Vascular smooth muscle contraction	2	59	Map2k2,Ppp1r12a
0.215612	0.602511	path:mmu05220	Human Diseases	Cancers	Chronic myeloid leukemia	2	60	Bcr,Map2k2
0.220005	0.602511	path:mmu04510	Cellular Processes	Cellular community - eukaryotes	Focal adhesion	3	131	Pip5k1c,Ppp1r12a,Rap1b
0.221491	0.602511	path:mmu05145	Human Diseases	Infectious diseases	Toxoplasmosis	2	62	Ifngr1,Tab2
0.222377	0.602511	path:mmu00030	Metabolism	Carbohydrate metabolism	Pentose phosphate pathway	1	15	Pfkl
0.222377	0.602511	path:mmu00900	Metabolism	Metabolism of terpenoids and polyketides	Terpenoid backbone biosynthesis	1	15	Nus1
0.22431	0.602511	path:mmu04114	Cellular Processes	Cell growth and death	Oocyte meiosis	2	63	Cdk1,Cdk2
0.22431	0.602511	path:mmu04611	Organismal Systems	Immune system	Platelet activation	2	63	Ppp1r12a,Rap1b
0.225321	0.602511	path:mmu05205	Human Diseases	Cancers	Proteoglycans in cancer	3	140	Frs2,Map2k2,Ppp1r12a
0.227047	0.602511	path:mmu03040	Genetic Information Processing	Transcription	Spliceosome	2	64	Sf3a2,Sf3b5
0.232279	0.602511	path:mmu05222	Human Diseases	Cancers	Small cell lung cancer	2	66	Apaf1,Cdk2
0.232592	0.602511	path:mmu00500	Metabolism	Carbohydrate metabolism	Starch and sucrose metabolism	1	16	Hk1
0.232592	0.602511	path:mmu00512	Metabolism	Glycan biosynthesis and metabolism	Mucin type O-glycan biosynthesis	1	16	Galnt4
0.232592	0.602511	path:mmu05020	Human Diseases	Neurodegenerative diseases	Prion diseases	1	16	Map2k2
0.234774	0.602511	path:mmu05215	Human Diseases	Cancers	Prostate cancer	2	67	Cdk2,Map2k2
0.237187	0.602511	path:mmu00240	Metabolism	Nucleotide metabolism	Pyrimidine metabolism	2	68	Polr2e,Polr3b
0.242326	0.602511	path:mmu00565	Metabolism	Lipid metabolism	Ether lipid metabolism	1	17	Chpt1
0.242326	0.602511	path:mmu04392	Environmental Information Processing	Signal transduction	Hippo signaling pathway - multiple species	1	17	Lats1
0.242326	0.602511	path:mmu04973	Organismal Systems	Digestive system	Carbohydrate digestion and absorption	1	17	Hk1
0.245603	0.602511	path:mmu04723	Organismal Systems	Nervous system	Retrograde endocannabinoid signaling	0	71
0.246034	0.602511	path:mmu04380	Organismal Systems	Development	Osteoclast differentiation	2	72	Ifngr1,Tab2
0.249977	0.602511	path:mmu00190	Metabolism	Energy metabolism	Oxidative phosphorylation	2	74	Atp5d,Ppa1
0.250527	0.602511	path:mmu04933	Human Diseases	Endocrine and metabolic diseases	AGE-RAGE signaling pathway in diabetic complications	0	70
0.251593	0.602511	path:mmu04130	Genetic Information Processing	Folding, sorting and degradation	SNARE interactions in vesicular transport	1	18	Stx7
0.251593	0.602511	path:mmu04215	Cellular Processes	Cell growth and death	Apoptosis - multiple species	1	18	Apaf1
0.251593	0.602511	path:mmu04961	Organismal Systems	Excretory system	Endocrine and other factor-regulated calcium reabsorption	1	18	Atp2b1
0.253606	0.602511	path:mmu04921	Organismal Systems	Endocrine system	Oxytocin signaling pathway	2	76	Map2k2,Ppp1r12a
0.255304	0.602511	path:mmu04110	Cellular Processes	Cell growth and death	Cell cycle	2	77	Cdk1,Cdk2
0.255304	0.602511	path:mmu04217	Cellular Processes	Cell growth and death	Necroptosis	2	77	Ifngr1,Stat6
0.255304	0.602511	path:mmu04371	Environmental Information Processing	Signal transduction	Apelin signaling pathway	2	77	Map2k2,Tfam
0.255304	0.602511	path:mmu04630	Environmental Information Processing	Signal transduction	Jak-STAT signaling pathway	2	77	Ifngr1,Stat6
0.255549	0.602511	path:mmu04931	Human Diseases	Endocrine and metabolic diseases	Insulin resistance	0	69
0.258469	0.602511	path:mmu04152	Environmental Information Processing	Signal transduction	AMPK signaling pathway	2	79	Pfkl,Sirt1
0.259938	0.602511	path:mmu04919	Organismal Systems	Endocrine system	Thyroid hormone signaling pathway	2	80	Map2k2,Med16
0.260713	0.602511	path:mmu04015	Environmental Information Processing	Signal transduction	Rap1 signaling pathway	2	127	Map2k2,Rap1b
0.261332	0.602511	path:mmu04072	Environmental Information Processing	Signal transduction	Phospholipase D signaling pathway	2	81	Map2k2,Pip5k1c
0.261332	0.602511	path:mmu04140	Cellular Processes	Transport and catabolism	Autophagy - animal	2	81	Dapk3,Map2k2
0.268165	0.602511	path:mmu04621	Organismal Systems	Immune system	NOD-like receptor signaling pathway	2	87	Tab2,Tbk1
0.268784	0.602511	path:mmu00020	Metabolism	Carbohydrate metabolism	Citrate cycle (TCA cycle)	1	20	Cs
0.268784	0.602511	path:mmu04962	Organismal Systems	Excretory system	Vasopressin-regulated water reabsorption	1	20	Rab5b
0.273216	0.602511	path:mmu04141	Genetic Information Processing	Folding, sorting and degradation	Protein processing in endoplasmic reticulum	2	110	Os9,Ube2g2
0.27359	0.602511	path:mmu05203	Human Diseases	Cancers	Viral carcinogenesis	2	109	Cdk1,Cdk2
0.273917	0.602511	path:mmu00230	Metabolism	Nucleotide metabolism	Purine metabolism	2	108	Polr2e,Polr3b
0.274196	0.602511	path:mmu05206	Human Diseases	Cancers	MicroRNAs in cancer	2	107	Map2k2,Sirt1
0.274728	0.602511	path:mmu05202	Human Diseases	Cancers	Transcriptional misregulation in cancer	2	100	Dot1l,Jmjd1c
0.276735	0.602511	path:mmu05144	Human Diseases	Infectious diseases	Malaria	1	21	Lrp1
0.284276	0.602511	path:mmu00590	Metabolism	Lipid metabolism	Arachidonic acid metabolism	1	22	Lta4h
0.284276	0.602511	path:mmu04978	Organismal Systems	Digestive system	Mineral absorption	1	22	Atp2b1
0.285652	0.602511	path:mmu04150	Environmental Information Processing	Signal transduction	mTOR signaling pathway	1	97	Map2k2
0.287853	0.602511	path:mmu04728	Organismal Systems	Nervous system	Dopaminergic synapse	0	63
0.29106	0.602511	path:mmu05224	Human Diseases	Cancers	Breast cancer	1	95	Map2k2
0.291417	0.602511	path:mmu00260	Metabolism	Amino acid metabolism	Glycine, serine and threonine metabolism	1	23	Shmt2
0.293753	0.602511	path:mmu03010	Genetic Information Processing	Translation	Ribosome	1	94	Rps12
0.298173	0.602511	path:mmu03460	Genetic Information Processing	Replication and repair	Fanconi anemia pathway	1	24	Rev3l
0.301771	0.602511	path:mmu04390	Environmental Information Processing	Signal transduction	Hippo signaling pathway	1	91	Lats1
0.309664	0.602511	path:mmu04062	Organismal Systems	Immune system	Chemokine signaling pathway	1	88	Rap1b
0.309664	0.602511	path:mmu04550	Cellular Processes	Cellular community - eukaryotes	Signaling pathways regulating pluripotency of stem cells	1	88	Map2k2
0.310575	0.602511	path:mmu04930	Human Diseases	Endocrine and metabolic diseases	Type II diabetes mellitus	1	26	Hk1
0.310575	0.602511	path:mmu05031	Human Diseases	Substance dependence	Amphetamine addiction	1	26	Sirt1
0.311615	0.602511	path:mmu05034	Human Diseases	Substance dependence	Alcoholism	0	59
0.31226	0.602511	path:mmu04060	Environmental Information Processing	Signaling molecules and interaction	Cytokine-cytokine receptor interaction	1	87	Ifngr1
0.321576	0.602511	path:mmu00310	Metabolism	Amino acid metabolism	Lysine degradation	1	28	Dot1l
0.32658	0.602511	path:mmu05014	Human Diseases	Neurodegenerative diseases	Amyotrophic lateral sclerosis (ALS)	1	29	Apaf1
0.32975	0.602511	path:mmu04926	Organismal Systems	Endocrine system	Relaxin signaling pathway	1	80	Map2k2
0.330707	0.602511	path:mmu04080	Environmental Information Processing	Signaling molecules and interaction	Neuroactive ligand-receptor interaction	0	56
0.330707	0.602511	path:mmu04350	Environmental Information Processing	Signal transduction	TGF-beta signaling pathway	0	56
0.330707	0.602511	path:mmu04725	Organismal Systems	Nervous system	Cholinergic synapse	0	56
0.330707	0.602511	path:mmu05212	Human Diseases	Cancers	Pancreatic cancer	0	56
0.331266	0.602511	path:mmu04622	Organismal Systems	Immune system	RIG-I-like receptor signaling pathway	1	30	Tbk1
0.331266	0.602511	path:mmu04664	Organismal Systems	Immune system	Fc epsilon RI signaling pathway	1	30	Map2k2
0.331266	0.602511	path:mmu04730	Organismal Systems	Nervous system	Long-term depression	1	30	Map2k2
0.334466	0.602511	path:mmu04020	Environmental Information Processing	Signal transduction	Calcium signaling pathway	1	78	Atp2b1
0.339024	0.602511	path:mmu04668	Environmental Information Processing	Signal transduction	TNF signaling pathway	1	76	Tab2
0.339728	0.602511	path:mmu04340	Environmental Information Processing	Signal transduction	Hedgehog signaling pathway	1	32	Csnk1g2
0.344077	0.602511	path:mmu05210	Human Diseases	Cancers	Colorectal cancer	0	54
0.347042	0.602511	path:mmu00520	Metabolism	Carbohydrate metabolism	Amino sugar and nucleotide sugar metabolism	1	34	Hk1
0.347042	0.602511	path:mmu00970	Genetic Information Processing	Translation	Aminoacyl-tRNA biosynthesis	1	34	Mars
0.347042	0.602511	path:mmu04970	Organismal Systems	Digestive system	Salivary secretion	1	34	Atp2b1
0.350962	0.602511	path:mmu04512	Environmental Information Processing	Signaling molecules and interaction	ECM-receptor interaction	0	53
0.350962	0.602511	path:mmu04520	Cellular Processes	Cellular community - eukaryotes	Adherens junction	0	53
0.353284	0.602511	path:mmu04370	Environmental Information Processing	Signal transduction	VEGF signaling pathway	1	36	Map2k2
0.353421	0.602511	path:mmu04261	Organismal Systems	Circulatory system	Adrenergic signaling in cardiomyocytes	1	69	Atp2b1
0.353421	0.602511	path:mmu05160	Human Diseases	Infectious diseases	Hepatitis C	1	69	Tbk1
0.356994	0.602511	path:mmu04071	Environmental Information Processing	Signal transduction	Sphingolipid signaling pathway	1	67	Map2k2
0.357985	0.602511	path:mmu04724	Organismal Systems	Nervous system	Glutamatergic synapse	0	52
0.357985	0.602511	path:mmu05414	Human Diseases	Cardiovascular diseases	Dilated cardiomyopathy (DCM)	0	52
0.360791	0.602511	path:mmu05213	Human Diseases	Cancers	Endometrial cancer	1	39	Map2k2
0.362833	0.602511	path:mmu04662	Organismal Systems	Immune system	B cell receptor signaling pathway	1	40	Map2k2
0.363245	0.602511	path:mmu01521	Human Diseases	Drug resistance	EGFR tyrosine kinase inhibitor resistance	1	63	Map2k2
0.3646	0.602511	path:mmu01522	Human Diseases	Drug resistance	Endocrine resistance	1	62	Map2k2
0.364657	0.602511	path:mmu05132	Human Diseases	Infectious diseases	Salmonella infection	1	41	Ifngr1
0.365147	0.602511	path:mmu05100	Human Diseases	Infectious diseases	Bacterial invasion of epithelial cells	0	51
0.365147	0.602511	path:mmu05410	Human Diseases	Cardiovascular diseases	Hypertrophic cardiomyopathy (HCM)	0	51
0.366271	0.602511	path:mmu04912	Organismal Systems	Endocrine system	GnRH signaling pathway	1	42	Map2k2
0.36907	0.602511	path:mmu04012	Environmental Information Processing	Signal transduction	ErbB signaling pathway	1	58	Map2k2
0.369931	0.602511	path:mmu04917	Organismal Systems	Endocrine system	Prolactin signaling pathway	1	45	Map2k2
0.369931	0.602511	path:mmu05218	Human Diseases	Cancers	Melanoma	1	45	Map2k2
0.369931	0.602511	path:mmu05221	Human Diseases	Cancers	Acute myeloid leukemia	1	45	Map2k2
0.370672	0.602511	path:mmu04211	Organismal Systems	Aging	Longevity regulating pathway	1	56	Sirt1
0.370779	0.602511	path:mmu05214	Human Diseases	Cancers	Glioma	1	46	Map2k2
0.370779	0.602511	path:mmu05223	Human Diseases	Cancers	Non-small cell lung cancer	1	46	Map2k2
0.371453	0.602511	path:mmu05412	Human Diseases	Cardiovascular diseases	Arrhythmogenic right ventricular cardiomyopathy (ARVC)	1	47	Gja1
0.371804	0.602511	path:mmu05146	Human Diseases	Infectious diseases	Amoebiasis	1	54	Rab5b
0.372181	0.602511	path:mmu04915	Organismal Systems	Endocrine system	Estrogen signaling pathway	1	53	Map2k2
0.372303	0.602511	path:mmu04064	Environmental Information Processing	Signal transduction	NF-kappa B signaling pathway	1	49	Tab2
0.372425	0.602511	path:mmu04666	Organismal Systems	Immune system	Fc gamma R-mediated phagocytosis	1	52	Pip5k1c
0.372425	0.602511	path:mmu04670	Organismal Systems	Immune system	Leukocyte transendothelial migration	1	52	Rap1b
0.372425	0.602511	path:mmu05142	Human Diseases	Infectious diseases	Chagas disease (American trypanosomiasis)	1	52	Ifngr1
0.372451	0.602511	path:mmu04146	Cellular Processes	Transport and catabolism	Peroxisome	0	50
0.372451	0.602511	path:mmu04514	Environmental Information Processing	Signaling molecules and interaction	Cell adhesion molecules (CAMs)	0	50
0.372491	0.602511	path:mmu00564	Metabolism	Lipid metabolism	Glycerophospholipid metabolism	1	50	Chpt1
0.372491	0.602511	path:mmu03015	Genetic Information Processing	Translation	mRNA surveillance pathway	1	50	Hbs1l
0.372491	0.602511	path:mmu04916	Organismal Systems	Endocrine system	Melanogenesis	1	50	Map2k2
0.37253	0.602511	path:mmu04660	Organismal Systems	Immune system	T cell receptor signaling pathway	1	51	Map2k2
0.411212	0.658354	path:mmu04713	Organismal Systems	Environmental adaptation	Circadian entrainment	0	45
0.411212	0.658354	path:mmu04750	Organismal Systems	Sensory system	Inflammatory mediator regulation of TRP channels	0	45
0.427817	0.678089	path:mmu04726	Organismal Systems	Nervous system	Serotonergic synapse	0	43
0.427817	0.678089	path:mmu05032	Human Diseases	Substance dependence	Morphine addiction	0	43
0.436367	0.684794	path:mmu04974	Organismal Systems	Digestive system	Protein digestion and absorption	0	42
0.436367	0.684794	path:mmu05217	Human Diseases	Cancers	Basal cell carcinoma	0	42
0.445088	0.684917	path:mmu03320	Organismal Systems	Endocrine system	PPAR signaling pathway	0	41
0.445088	0.684917	path:mmu04727	Organismal Systems	Nervous system	GABAergic synapse	0	41
0.445088	0.684917	path:mmu04920	Organismal Systems	Endocrine system	Adipocytokine signaling pathway	0	41
0.445088	0.684917	path:mmu04925	Organismal Systems	Endocrine system	Aldosterone synthesis and secretion	0	41
0.472304	0.723287	path:mmu05323	Human Diseases	Immune diseases	Rheumatoid arthritis	0	38
0.491361	0.745271	path:mmu00480	Metabolism	Metabolism of other amino acids	Glutathione metabolism	0	36
0.491361	0.745271	path:mmu01212	Mus Musculus	Metabolic pathways	Fatty acid metabolism	0	36
0.501175	0.756535	path:mmu04260	Organismal Systems	Circulatory system	Cardiac muscle contraction	0	35
0.511183	0.767986	path:mmu04923	Organismal Systems	Endocrine system	Regulation of lipolysis in adipocytes	0	34
0.52139	0.775966	path:mmu03050	Genetic Information Processing	Folding, sorting and degradation	Proteasome	0	33
0.52139	0.775966	path:mmu04911	Organismal Systems	Endocrine system	Insulin secretion	0	33
0.5318	0.780466	path:mmu00280	Metabolism	Amino acid metabolism	Valine, leucine and isoleucine degradation	0	32
0.5318	0.780466	path:mmu00561	Metabolism	Lipid metabolism	Glycerolipid metabolism	0	32
0.5318	0.780466	path:mmu04640	Organismal Systems	Immune system	Hematopoietic cell lineage	0	32
0.542417	0.792378	path:mmu04330	Environmental Information Processing	Signal transduction	Notch signaling pathway	0	31
0.553244	0.795016	path:mmu00330	Metabolism	Amino acid metabolism	Arginine and proline metabolism	0	30
0.553244	0.795016	path:mmu04918	Organismal Systems	Endocrine system	Thyroid hormone synthesis	0	30
0.553244	0.795016	path:mmu04924	Organismal Systems	Endocrine system	Renin secretion	0	30
0.564286	0.795016	path:mmu00071	Metabolism	Lipid metabolism	Fatty acid degradation	0	29
0.564286	0.795016	path:mmu00510	Metabolism	Glycan biosynthesis and metabolism	N-Glycan biosynthesis	0	29
0.564286	0.795016	path:mmu04216	Cellular Processes	Cell growth and death	Ferroptosis	0	29
0.564286	0.795016	path:mmu04721	Organismal Systems	Nervous system	Synaptic vesicle cycle	0	29
0.564286	0.795016	path:mmu05133	Human Diseases	Infectious diseases	Pertussis	0	29
0.575547	0.807294	path:mmu04971	Organismal Systems	Digestive system	Gastric acid secretion	0	28
0.598745	0.827303	path:mmu04612	Organismal Systems	Immune system	Antigen processing and presentation	0	26
0.598745	0.827303	path:mmu04976	Organismal Systems	Digestive system	Bile secretion	0	26
0.61069	0.827303	path:mmu00270	Metabolism	Amino acid metabolism	Cysteine and methionine metabolism	0	25
0.61069	0.827303	path:mmu00600	Metabolism	Lipid metabolism	Sphingolipid metabolism	0	25
0.61069	0.827303	path:mmu00980	Metabolism	Xenobiotics biodegradation and metabolism	Metabolism of xenobiotics by cytochrome P450	0	25
0.61069	0.827303	path:mmu02010	Environmental Information Processing	Membrane transport	ABC transporters	0	25
0.61069	0.827303	path:mmu05204	Human Diseases	Cancers	Chemical carcinogenesis	0	25
0.61069	0.827303	path:mmu05416	Human Diseases	Cardiovascular diseases	Viral myocarditis	0	25
0.622872	0.836655	path:mmu03420	Genetic Information Processing	Replication and repair	Nucleotide excision repair	0	24
0.622872	0.836655	path:mmu05322	Human Diseases	Immune diseases	Systemic lupus erythematosus	0	24
0.635296	0.842631	path:mmu00250	Metabolism	Amino acid metabolism	Alanine, aspartate and glutamate metabolism	0	23
0.635296	0.842631	path:mmu00620	Metabolism	Carbohydrate metabolism	Pyruvate metabolism	0	23
0.635296	0.842631	path:mmu03440	Genetic Information Processing	Replication and repair	Homologous recombination	0	23
0.647967	0.855856	path:mmu03030	Genetic Information Processing	Replication and repair	DNA replication	0	22
0.660888	0.864838	path:mmu00860	Metabolism	Metabolism of cofactors and vitamins	Porphyrin and chlorophyll metabolism	0	21
0.660888	0.864838	path:mmu05030	Human Diseases	Substance dependence	Cocaine addiction	0	21
0.674066	0.864838	path:mmu00410	Metabolism	Metabolism of other amino acids	beta-Alanine metabolism	0	20
0.674066	0.864838	path:mmu00982	Metabolism	Xenobiotics biodegradation and metabolism	Drug metabolism - cytochrome P450	0	20
0.674066	0.864838	path:mmu03022	Genetic Information Processing	Transcription	Basal transcription factors	0	20
0.674066	0.864838	path:mmu04610	Organismal Systems	Immune system	Complement and coagulation cascades	0	20
0.674066	0.864838	path:mmu04960	Organismal Systems	Excretory system	Aldosterone-regulated sodium reabsorption	0	20
0.687505	0.864838	path:mmu00640	Metabolism	Carbohydrate metabolism	Propanoate metabolism	0	19
0.687505	0.864838	path:mmu00983	Metabolism	Xenobiotics biodegradation and metabolism	Drug metabolism - other enzymes	0	19
0.687505	0.864838	path:mmu03410	Genetic Information Processing	Replication and repair	Base excision repair	0	19
0.687505	0.864838	path:mmu04710	Organismal Systems	Environmental adaptation	Circadian rhythm	0	19
0.687505	0.864838	path:mmu04913	Organismal Systems	Endocrine system	Ovarian steroidogenesis	0	19
0.701211	0.878592	path:mmu04740	Organismal Systems	Sensory system	Olfactory transduction	0	18
0.715188	0.892577	path:mmu00532	Metabolism	Glycan biosynthesis and metabolism	Glycosaminoglycan biosynthesis - chondroitin sulfate / dermatan sulfate	0	17
0.729443	0.903255	path:mmu00380	Metabolism	Amino acid metabolism	Tryptophan metabolism	0	16
0.729443	0.903255	path:mmu00563	Metabolism	Glycan biosynthesis and metabolism	Glycosylphosphatidylinositol (GPI)-anchor biosynthesis	0	16
0.74398	0.906931	path:mmu00534	Metabolism	Glycan biosynthesis and metabolism	Glycosaminoglycan biosynthesis - heparan sulfate / heparin	0	15
0.74398	0.906931	path:mmu00830	Metabolism	Metabolism of cofactors and vitamins	Retinol metabolism	0	15
0.74398	0.906931	path:mmu04136	Cellular Processes	Transport and catabolism	Autophagy - other	0	15
0.758805	0.906931	path:mmu00350	Metabolism	Amino acid metabolism	Tyrosine metabolism	0	14
0.758805	0.906931	path:mmu00601	Metabolism	Glycan biosynthesis and metabolism	Glycosphingolipid biosynthesis - lacto and neolacto series	0	14
0.758805	0.906931	path:mmu03060	Genetic Information Processing	Folding, sorting and degradation	Protein export	0	14
0.758805	0.906931	path:mmu04742	Organismal Systems	Sensory system	Taste transduction	0	14
0.773924	0.906931	path:mmu00100	Metabolism	Lipid metabolism	Steroid biosynthesis	0	13
0.773924	0.906931	path:mmu00511	Metabolism	Glycan biosynthesis and metabolism	Other glycan degradation	0	13
0.773924	0.906931	path:mmu00760	Metabolism	Metabolism of cofactors and vitamins	Nicotinate and nicotinamide metabolism	0	13
0.773924	0.906931	path:mmu01040	Metabolism	Lipid metabolism	Biosynthesis of unsaturated fatty acids	0	13
0.789342	0.906931	path:mmu00062	Metabolism	Lipid metabolism	Fatty acid elongation	0	12
0.789342	0.906931	path:mmu04940	Human Diseases	Endocrine and metabolic diseases	Type I diabetes mellitus	0	12
0.805066	0.906931	path:mmu00040	Metabolism	Carbohydrate metabolism	Pentose and glucuronate interconversions	0	11
0.805066	0.906931	path:mmu00061	Metabolism	Lipid metabolism	Fatty acid biosynthesis	0	11
0.805066	0.906931	path:mmu00220	Metabolism	Amino acid metabolism	Arginine biosynthesis	0	11
0.805066	0.906931	path:mmu00340	Metabolism	Amino acid metabolism	Histidine metabolism	0	11
0.805066	0.906931	path:mmu00650	Metabolism	Carbohydrate metabolism	Butanoate metabolism	0	11
0.805066	0.906931	path:mmu04672	Organismal Systems	Immune system	Intestinal immune network for IgA production	0	11
0.805066	0.906931	path:mmu04966	Organismal Systems	Excretory system	Collecting duct acid secretion	0	11
0.805066	0.906931	path:mmu04975	Organismal Systems	Digestive system	Fat digestion and absorption	0	11
0.805066	0.906931	path:mmu05340	Human Diseases	Immune diseases	Primary immunodeficiency	0	11
0.821102	0.906931	path:mmu00140	Metabolism	Lipid metabolism	Steroid hormone biosynthesis	0	10
0.821102	0.906931	path:mmu00515	Metabolism	Glycan biosynthesis and metabolism	Mannose type O-glycan biosynthesis	0	10
0.821102	0.906931	path:mmu00533	Metabolism	Glycan biosynthesis and metabolism	Glycosaminoglycan biosynthesis - keratan sulfate	0	10
0.821102	0.906931	path:mmu00604	Metabolism	Glycan biosynthesis and metabolism	Glycosphingolipid biosynthesis - ganglio series	0	10
0.821102	0.906931	path:mmu00730	Metabolism	Metabolism of cofactors and vitamins	Thiamine metabolism	0	10
0.821102	0.906931	path:mmu00790	Metabolism	Metabolism of cofactors and vitamins	Folate biosynthesis	0	10
0.821102	0.906931	path:mmu03430	Genetic Information Processing	Replication and repair	Mismatch repair	0	10
0.821102	0.906931	path:mmu04964	Organismal Systems	Excretory system	Proximal tubule bicarbonate reclamation	0	10
0.821102	0.906931	path:mmu05033	Human Diseases	Substance dependence	Nicotine addiction	0	10
0.837455	0.909155	path:mmu00120	Metabolism	Lipid metabolism	Primary bile acid biosynthesis	0	9
0.837455	0.909155	path:mmu00130	Metabolism	Metabolism of cofactors and vitamins	Ubiquinone and other terpenoid-quinone biosynthesis	0	9
0.837455	0.909155	path:mmu05150	Human Diseases	Infectious diseases	Staphylococcus aureus infection	0	9
0.837455	0.909155	path:mmu05320	Human Diseases	Immune diseases	Autoimmune thyroid disease	0	9
0.837455	0.909155	path:mmu05332	Human Diseases	Immune diseases	Graft-versus-host disease	0	9
0.854132	0.91783	path:mmu00360	Metabolism	Amino acid metabolism	Phenylalanine metabolism	0	8
0.854132	0.91783	path:mmu00592	Metabolism	Lipid metabolism	alpha-Linolenic acid metabolism	0	8
0.854132	0.91783	path:mmu05330	Human Diseases	Immune diseases	Allograft rejection	0	8
0.871139	0.923582	path:mmu00053	Metabolism	Carbohydrate metabolism	Ascorbate and aldarate metabolism	0	7
0.871139	0.923582	path:mmu00603	Metabolism	Glycan biosynthesis and metabolism	Glycosphingolipid biosynthesis - globo and isoglobo series	0	7
0.871139	0.923582	path:mmu00770	Metabolism	Metabolism of cofactors and vitamins	Pantothenate and CoA biosynthesis	0	7
0.871139	0.923582	path:mmu00910	Metabolism	Energy metabolism	Nitrogen metabolism	0	7
0.888483	0.926477	path:mmu00072	Metabolism	Lipid metabolism	Synthesis and degradation of ketone bodies	0	6
0.888483	0.926477	path:mmu00750	Metabolism	Metabolism of cofactors and vitamins	Vitamin B6 metabolism	0	6
0.888483	0.926477	path:mmu00920	Metabolism	Energy metabolism	Sulfur metabolism	0	6
0.888483	0.926477	path:mmu03450	Genetic Information Processing	Replication and repair	Non-homologous end-joining	0	6
0.888483	0.926477	path:mmu04122	Genetic Information Processing	Folding, sorting and degradation	Sulfur relay system	0	6
0.90617	0.932649	path:mmu00430	Metabolism	Metabolism of other amino acids	Taurine and hypotaurine metabolism	0	5
0.90617	0.932649	path:mmu00591	Metabolism	Lipid metabolism	Linoleic acid metabolism	0	5
0.90617	0.932649	path:mmu00740	Metabolism	Metabolism of cofactors and vitamins	Riboflavin metabolism	0	5
0.90617	0.932649	path:mmu04744	Organismal Systems	Sensory system	Phototransduction	0	5
0.924208	0.948136	path:mmu04950	Human Diseases	Endocrine and metabolic diseases	Maturity onset diabetes of the young	0	4
0.961361	0.970546	path:mmu00232	Metabolism	Biosynthesis of other secondary metabolites	Caffeine metabolism	0	2
0.961361	0.970546	path:mmu00400	Metabolism	Amino acid metabolism	Phenylalanine, tyrosine and tryptophan biosynthesis	0	2
0.961361	0.970546	path:mmu00471	Metabolism	Metabolism of other amino acids	D-Glutamine and D-glutamate metabolism	0	2
0.961361	0.970546	path:mmu00785	Metabolism	Metabolism of cofactors and vitamins	Lipoic acid metabolism	0	2
0.961361	0.970546	path:mmu05310	Human Diseases	Immune diseases	Asthma	0	2
0.980491	0.983594	path:mmu00290	Metabolism	Amino acid metabolism	Valine, leucine and isoleucine biosynthesis	0	1
0.980491	0.983594	path:mmu00780	Metabolism	Metabolism of cofactors and vitamins	Biotin metabolism	0	1
1	1	path:mmu00472	Metabolism	Metabolism of other amino acids	D-Arginine and D-ornithine metabolism	0	0

## Sheet: KEGG_module_6
pv	pv_fdr	term	Brite1	Brite2	kegg_name	hits	BG	Symbols
4.55264e-05	0.0144319	path:mmu03010	Genetic Information Processing	Translation	Ribosome	6	94	Rpl23,Rpl24,Rpl36a,Rpl5,Rps16,Rps27
0.00359738	0.498925	path:mmu01230	Mus Musculus	Metabolic pathways	Biosynthesis of amino acids	3	45	Cps1,Csl,Gapdh
0.00472169	0.498925	path:mmu00830	Metabolism	Metabolism of cofactors and vitamins	Retinol metabolism	2	15	Aldh1a2,Dhrs3
0.0108626	0.860864	path:mmu01200	Mus Musculus	Metabolic pathways	Carbon metabolism	3	68	Cps1,Csl,Gapdh
0.0165775	0.880335	path:mmu04972	Organismal Systems	Digestive system	Pancreatic secretion	2	29	4930544G11Rik,Atp1a3
0.0176395	0.880335	path:mmu00330	Metabolism	Amino acid metabolism	Arginine and proline metabolism	2	30	Ckb,Ckmt1
0.0207493	0.880335	path:mmu04022	Environmental Information Processing	Signal transduction	cGMP-PKG signaling pathway	3	88	4930544G11Rik,Atp1a3,Irs4
0.0233093	0.880335	path:mmu04260	Organismal Systems	Circulatory system	Cardiac muscle contraction	2	35	Actc1,Atp1a3
0.027675	0.880335	path:mmu04950	Human Diseases	Endocrine and metabolic diseases	Maturity onset diabetes of the young	1	4	Pax6
0.0282381	0.880335	path:mmu04213	Organismal Systems	Aging	Longevity regulating pathway - multiple species	2	39	Hspa1l,Irs4
0.0305479	0.880335	path:mmu01100	Mus Musculus	Metabolic pathways	Metabolic pathways	9	691	Aldh1a2,Atp5g2,Ckb,Ckmt1,Cps1,Csl,Dhrs3,Gapdh,Pygl
0.0474265	0.993365	path:mmu00910	Metabolism	Energy metabolism	Nitrogen metabolism	1	7	Cps1
0.0592564	0.993365	path:mmu05205	Human Diseases	Cancers	Proteoglycans in cancer	3	140	4930544G11Rik,Gpc3,Hoxd10
0.0663462	0.993365	path:mmu04964	Organismal Systems	Excretory system	Proximal tubule bicarbonate reclamation	1	10	Atp1a3
0.0724723	0.993365	path:mmu00220	Metabolism	Amino acid metabolism	Arginine biosynthesis	1	11	Cps1
0.0726479	0.993365	path:mmu04261	Organismal Systems	Circulatory system	Adrenergic signaling in cardiomyocytes	2	69	Actc1,Atp1a3
0.0785098	0.993365	path:mmu01210	Mus Musculus	Metabolic pathways	2-Oxocarboxylic acid metabolism	1	12	Csl
0.0857211	0.993365	path:mmu04217	Cellular Processes	Cell growth and death	Necroptosis	2	77	Ppia,Pygl
0.0906703	0.993365	path:mmu04919	Organismal Systems	Endocrine system	Thyroid hormone signaling pathway	2	80	Atp1a3,Slc16a2
0.101792	0.993365	path:mmu00500	Metabolism	Carbohydrate metabolism	Starch and sucrose metabolism	1	16	Pygl
0.103906	0.993365	path:mmu04910	Organismal Systems	Endocrine system	Insulin signaling pathway	2	88	Irs4,Pygl
0.107211	0.993365	path:mmu04024	Environmental Information Processing	Signal transduction	cAMP signaling pathway	2	90	4930544G11Rik,Atp1a3
0.1074	0.993365	path:mmu00630	Metabolism	Carbohydrate metabolism	Glyoxylate and dicarboxylate metabolism	1	17	Csl
0.1074	0.993365	path:mmu04973	Organismal Systems	Digestive system	Carbohydrate digestion and absorption	1	17	Atp1a3
0.108862	0.993365	path:mmu04530	Cellular Processes	Cellular community - eukaryotes	Tight junction	2	91	4930544G11Rik,Tuba3a
0.112158	0.993365	path:mmu03013	Genetic Information Processing	Translation	RNA transport	2	93	Cyfip2,Nup210
0.112925	0.993365	path:mmu04961	Organismal Systems	Excretory system	Endocrine and other factor-regulated calcium reabsorption	1	18	Atp1a3
0.115446	0.993365	path:mmu05224	Human Diseases	Cancers	Breast cancer	2	95	Hey1,Jag2
0.120357	0.993365	path:mmu05010	Human Diseases	Neurodegenerative diseases	Alzheimer's disease	2	98	Atp5g2,Gapdh
0.123728	0.993365	path:mmu00020	Metabolism	Carbohydrate metabolism	Citrate cycle (TCA cycle)	1	20	Csl
0.123728	0.993365	path:mmu04960	Organismal Systems	Excretory system	Aldosterone-regulated sodium reabsorption	1	20	Atp1a3
0.134209	0.993365	path:mmu04978	Organismal Systems	Digestive system	Mineral absorption	1	22	Atp1a3
0.134892	0.993365	path:mmu05206	Human Diseases	Cancers	MicroRNAs in cancer	2	107	4930544G11Rik,Hoxd10
0.13933	0.993365	path:mmu00250	Metabolism	Amino acid metabolism	Alanine, aspartate and glutamate metabolism	1	23	Cps1
0.15423	0.993365	path:mmu04612	Organismal Systems	Immune system	Antigen processing and presentation	1	26	Hspa1l
0.15423	0.993365	path:mmu04930	Human Diseases	Endocrine and metabolic diseases	Type II diabetes mellitus	1	26	Irs4
0.15423	0.993365	path:mmu04976	Organismal Systems	Digestive system	Bile secretion	1	26	Atp1a3
0.15423	0.993365	path:mmu05134	Human Diseases	Infectious diseases	Legionellosis	1	26	Hspa1l
0.159655	0.993365	path:mmu04810	Cellular Processes	Cell motility	Regulation of actin cytoskeleton	2	123	4930544G11Rik,Cyfip2
0.163783	0.993365	path:mmu04971	Organismal Systems	Digestive system	Gastric acid secretion	1	28	Atp1a3
0.168449	0.993365	path:mmu04721	Organismal Systems	Nervous system	Synaptic vesicle cycle	1	29	Unc13b
0.168449	0.993365	path:mmu05014	Human Diseases	Neurodegenerative diseases	Amyotrophic lateral sclerosis (ALS)	1	29	Nefl
0.168449	0.993365	path:mmu05133	Human Diseases	Infectious diseases	Pertussis	1	29	4930544G11Rik
0.173041	0.993365	path:mmu00010	Metabolism	Carbohydrate metabolism	Glycolysis / Gluconeogenesis	1	30	Gapdh
0.173041	0.993365	path:mmu04918	Organismal Systems	Endocrine system	Thyroid hormone synthesis	1	30	Atp1a3
0.174206	0.993365	path:mmu04360	Organismal Systems	Development	Axon guidance	2	133	4930544G11Rik,Dpysl5
0.17756	0.993365	path:mmu04330	Environmental Information Processing	Signal transduction	Notch signaling pathway	1	31	Jag2
0.186385	0.993365	path:mmu04911	Organismal Systems	Endocrine system	Insulin secretion	1	33	Atp1a3
0.190692	0.993365	path:mmu04923	Organismal Systems	Endocrine system	Regulation of lipolysis in adipocytes	1	34	Irs4
0.190692	0.993365	path:mmu04970	Organismal Systems	Digestive system	Salivary secretion	1	34	Atp1a3
0.205522	0.993365	path:mmu04144	Cellular Processes	Transport and catabolism	Endocytosis	2	157	4930544G11Rik,Hspa1l
0.218938	0.993365	path:mmu04920	Organismal Systems	Endocrine system	Adipocytokine signaling pathway	1	41	Irs4
0.222711	0.993365	path:mmu04974	Organismal Systems	Digestive system	Protein digestion and absorption	1	42	Atp1a3
0.230054	0.993365	path:mmu04151	Environmental Information Processing	Signal transduction	PI3K-Akt signaling pathway	0	205
0.23717	0.993365	path:mmu05223	Human Diseases	Cancers	Non-small cell lung cancer	1	46	Rarb
0.240632	0.993365	path:mmu04540	Cellular Processes	Cellular community - eukaryotes	Gap junction	1	47	Tuba3a
0.240632	0.993365	path:mmu04658	Organismal Systems	Immune system	Th1 and Th2 cell differentiation	1	47	Jag2
0.240632	0.993365	path:mmu05412	Human Diseases	Cardiovascular diseases	Arrhythmogenic right ventricular cardiomyopathy (ARVC)	1	47	Dsp
0.247374	0.993365	path:mmu04922	Organismal Systems	Endocrine system	Glucagon signaling pathway	1	49	Pygl
0.250638	0.993365	path:mmu05165	Human Diseases	Infectious diseases	Human papillomavirus infection	2	205	Hey1,Tubg2
0.250656	0.993365	path:mmu04514	Environmental Information Processing	Signaling molecules and interaction	Cell adhesion molecules (CAMs)	1	50	Cadm1
0.253881	0.993365	path:mmu04660	Organismal Systems	Immune system	T cell receptor signaling pathway	1	51	4930544G11Rik
0.253881	0.993365	path:mmu05100	Human Diseases	Infectious diseases	Bacterial invasion of epithelial cells	1	51	4930544G11Rik
0.253881	0.993365	path:mmu05410	Human Diseases	Cardiovascular diseases	Hypertrophic cardiomyopathy (HCM)	1	51	Actc1
0.257047	0.993365	path:mmu04670	Organismal Systems	Immune system	Leukocyte transendothelial migration	1	52	4930544G11Rik
0.257047	0.993365	path:mmu05414	Human Diseases	Cardiovascular diseases	Dilated cardiomyopathy (DCM)	1	52	Actc1
0.260157	0.993365	path:mmu04520	Cellular Processes	Cellular community - eukaryotes	Adherens junction	1	53	4930544G11Rik
0.260157	0.993365	path:mmu04915	Organismal Systems	Endocrine system	Estrogen signaling pathway	1	53	Hspa1l
0.26321	0.993365	path:mmu05210	Human Diseases	Cancers	Colorectal cancer	1	54	4930544G11Rik
0.269151	0.993365	path:mmu04211	Organismal Systems	Aging	Longevity regulating pathway	1	56	Irs4
0.269151	0.993365	path:mmu04350	Environmental Information Processing	Signal transduction	TGF-beta signaling pathway	1	56	4930544G11Rik
0.269982	0.993365	path:mmu05200	Human Diseases	Cancers	Pathways in cancer	2	244	4930544G11Rik,Rarb
0.277655	0.993365	path:mmu04270	Organismal Systems	Circulatory system	Vascular smooth muscle contraction	1	59	4930544G11Rik
0.285685	0.993365	path:mmu01522	Human Diseases	Drug resistance	Endocrine resistance	1	62	Jag2
0.285685	0.993365	path:mmu05145	Human Diseases	Infectious diseases	Toxoplasmosis	1	62	Hspa1l
0.288259	0.993365	path:mmu04611	Organismal Systems	Immune system	Platelet activation	1	63	4930544G11Rik
0.290783	0.993365	path:mmu03040	Genetic Information Processing	Transcription	Spliceosome	1	64	Hspa1l
0.295682	0.993365	path:mmu05222	Human Diseases	Cancers	Small cell lung cancer	1	66	Rarb
0.298058	0.993365	path:mmu04071	Environmental Information Processing	Signal transduction	Sphingolipid signaling pathway	1	67	4930544G11Rik
0.302667	0.993365	path:mmu04931	Human Diseases	Endocrine and metabolic diseases	Insulin resistance	1	69	Pygl
0.302667	0.993365	path:mmu05162	Human Diseases	Infectious diseases	Measles	1	69	Hspa1l
0.304901	0.993365	path:mmu04066	Environmental Information Processing	Signal transduction	HIF-1 signaling pathway	1	70	Gapdh
0.30923	0.993365	path:mmu04145	Cellular Processes	Transport and catabolism	Phagosome	1	72	Tuba3a
0.311326	0.993365	path:mmu04722	Organismal Systems	Nervous system	Neurotrophin signaling pathway	1	73	4930544G11Rik
0.313377	0.993365	path:mmu00190	Metabolism	Energy metabolism	Oxidative phosphorylation	1	74	Atp5g2
0.315384	0.993365	path:mmu05012	Human Diseases	Neurodegenerative diseases	Parkinson's disease	1	75	Atp5g2
0.317347	0.993365	path:mmu04921	Organismal Systems	Endocrine system	Oxytocin signaling pathway	1	76	4930544G11Rik
0.318507	0.993365	path:mmu05166	Human Diseases	Infectious diseases	HTLV-I infection	0	160
0.321144	0.993365	path:mmu05152	Human Diseases	Infectious diseases	Tuberculosis	1	78	4930544G11Rik
0.322979	0.993365	path:mmu04152	Environmental Information Processing	Signal transduction	AMPK signaling pathway	1	79	Irs4
0.326523	0.993365	path:mmu04072	Environmental Information Processing	Signal transduction	Phospholipase D signaling pathway	1	81	4930544G11Rik
0.326523	0.993365	path:mmu04140	Cellular Processes	Transport and catabolism	Autophagy - animal	1	81	Irs4
0.329904	0.993365	path:mmu05164	Human Diseases	Infectious diseases	Influenza A	1	83	Hspa1l
0.336191	0.993365	path:mmu04068	Environmental Information Processing	Signal transduction	FoxO signaling pathway	1	87	Irs4
0.336191	0.993365	path:mmu04210	Cellular Processes	Cell growth and death	Apoptosis	1	87	Tuba3a
0.336191	0.993365	path:mmu04621	Organismal Systems	Immune system	NOD-like receptor signaling pathway	1	87	4930544G11Rik
0.337667	0.993365	path:mmu04062	Organismal Systems	Immune system	Chemokine signaling pathway	1	88	4930544G11Rik
0.337667	0.993365	path:mmu04550	Cellular Processes	Cellular community - eukaryotes	Signaling pathways regulating pluripotency of stem cells	1	88	Pax6
0.340506	0.993365	path:mmu05418	Human Diseases	Cardiovascular diseases	Fluid shear stress and atherosclerosis	1	90	4930544G11Rik
0.345747	0.993365	path:mmu04310	Environmental Information Processing	Signal transduction	Wnt signaling pathway	1	94	4930544G11Rik
0.348157	0.993365	path:mmu05016	Human Diseases	Neurodegenerative diseases	Huntington's disease	1	96	Atp5g2
0.34931	0.993365	path:mmu04150	Environmental Information Processing	Signal transduction	mTOR signaling pathway	1	97	4930544G11Rik
0.352569	0.993365	path:mmu05202	Human Diseases	Cancers	Transcriptional misregulation in cancer	1	100	Hoxa9
0.355748	0.993365	path:mmu04010	Environmental Information Processing	Signal transduction	MAPK signaling pathway	1	187	Hspa1l
0.360635	0.993365	path:mmu05203	Human Diseases	Cancers	Viral carcinogenesis	1	109	4930544G11Rik
0.361381	0.993365	path:mmu04141	Genetic Information Processing	Folding, sorting and degradation	Protein processing in endoplasmic reticulum	1	110	Hspa1l
0.368201	0.993365	path:mmu05169	Human Diseases	Infectious diseases	Epstein-Barr virus infection	1	122	Hspa1l
0.369965	0.993365	path:mmu04015	Environmental Information Processing	Signal transduction	Rap1 signaling pathway	1	127	4930544G11Rik
0.370746	0.993365	path:mmu04014	Environmental Information Processing	Signal transduction	Ras signaling pathway	1	130	4930544G11Rik
0.370961	0.993365	path:mmu04510	Cellular Processes	Cellular community - eukaryotes	Focal adhesion	1	131	4930544G11Rik
0.418696	0.993365	path:mmu05225	Human Diseases	Cancers	Hepatocellular carcinoma	0	122
0.462954	0.993365	path:mmu00230	Metabolism	Nucleotide metabolism	Purine metabolism	0	108
0.476425	0.993365	path:mmu04218	Cellular Processes	Cell growth and death	Cellular senescence	0	104
0.479852	0.993365	path:mmu05167	Human Diseases	Infectious diseases	Kaposi's sarcoma-associated herpesvirus infection	0	103
0.508161	0.993365	path:mmu04932	Human Diseases	Endocrine and metabolic diseases	Non-alcoholic fatty liver disease (NAFLD)	0	95
0.522926	0.993365	path:mmu04390	Environmental Information Processing	Signal transduction	Hippo signaling pathway	0	91
0.530467	0.993365	path:mmu05161	Human Diseases	Infectious diseases	Hepatitis B	0	89
0.530467	0.993365	path:mmu05168	Human Diseases	Infectious diseases	Herpes simplex infection	0	89
0.534277	0.993365	path:mmu04142	Cellular Processes	Transport and catabolism	Lysosome	0	88
0.538114	0.993365	path:mmu04060	Environmental Information Processing	Signaling molecules and interaction	Cytokine-cytokine receptor interaction	0	87
0.565745	0.993365	path:mmu04926	Organismal Systems	Endocrine system	Relaxin signaling pathway	0	80
0.573893	0.993365	path:mmu04020	Environmental Information Processing	Signal transduction	Calcium signaling pathway	0	78
0.573893	0.993365	path:mmu04120	Genetic Information Processing	Folding, sorting and degradation	Ubiquitin mediated proteolysis	0	78
0.57801	0.993365	path:mmu04110	Cellular Processes	Cell growth and death	Cell cycle	0	77
0.57801	0.993365	path:mmu04371	Environmental Information Processing	Signal transduction	Apelin signaling pathway	0	77
0.57801	0.993365	path:mmu04630	Environmental Information Processing	Signal transduction	Jak-STAT signaling pathway	0	77
0.582156	0.993365	path:mmu04668	Environmental Information Processing	Signal transduction	TNF signaling pathway	0	76
0.599036	0.993365	path:mmu04380	Organismal Systems	Development	Osteoclast differentiation	0	72
0.603331	0.993365	path:mmu04723	Organismal Systems	Nervous system	Retrograde endocannabinoid signaling	0	71
0.607656	0.993365	path:mmu04933	Human Diseases	Endocrine and metabolic diseases	AGE-RAGE signaling pathway in diabetic complications	0	70
0.612012	0.993365	path:mmu05160	Human Diseases	Infectious diseases	Hepatitis C	0	69
0.616399	0.993365	path:mmu00240	Metabolism	Nucleotide metabolism	Pyrimidine metabolism	0	68
0.620816	0.993365	path:mmu05215	Human Diseases	Cancers	Prostate cancer	0	67
0.6388	0.993365	path:mmu01521	Human Diseases	Drug resistance	EGFR tyrosine kinase inhibitor resistance	0	63
0.6388	0.993365	path:mmu04114	Cellular Processes	Cell growth and death	Oocyte meiosis	0	63
0.6388	0.993365	path:mmu04728	Organismal Systems	Nervous system	Dopaminergic synapse	0	63
0.647983	0.993365	path:mmu05231	Human Diseases	Cancers	Choline metabolism in cancer	0	61
0.652624	0.993365	path:mmu04070	Environmental Information Processing	Signal transduction	Phosphatidylinositol signaling system	0	60
0.652624	0.993365	path:mmu05220	Human Diseases	Cancers	Chronic myeloid leukemia	0	60
0.657297	0.993365	path:mmu05034	Human Diseases	Substance dependence	Alcoholism	0	59
0.662003	0.993365	path:mmu04012	Environmental Information Processing	Signal transduction	ErbB signaling pathway	0	58
0.671514	0.993365	path:mmu04080	Environmental Information Processing	Signaling molecules and interaction	Neuroactive ligand-receptor interaction	0	56
0.671514	0.993365	path:mmu04659	Organismal Systems	Immune system	Th17 cell differentiation	0	56
0.671514	0.993365	path:mmu04725	Organismal Systems	Nervous system	Cholinergic synapse	0	56
0.671514	0.993365	path:mmu05212	Human Diseases	Cancers	Pancreatic cancer	0	56
0.676321	0.993365	path:mmu03018	Genetic Information Processing	Folding, sorting and degradation	RNA degradation	0	55
0.681161	0.993365	path:mmu05146	Human Diseases	Infectious diseases	Amoebiasis	0	54
0.686035	0.993365	path:mmu03008	Genetic Information Processing	Translation	Ribosome biogenesis in eukaryotes	0	53
0.686035	0.993365	path:mmu04512	Environmental Information Processing	Signaling molecules and interaction	ECM-receptor interaction	0	53
0.690944	0.993365	path:mmu04666	Organismal Systems	Immune system	Fc gamma R-mediated phagocytosis	0	52
0.690944	0.993365	path:mmu04724	Organismal Systems	Nervous system	Glutamatergic synapse	0	52
0.690944	0.993365	path:mmu04914	Organismal Systems	Endocrine system	Progesterone-mediated oocyte maturation	0	52
0.690944	0.993365	path:mmu05142	Human Diseases	Infectious diseases	Chagas disease (American trypanosomiasis)	0	52
0.700865	0.993365	path:mmu00564	Metabolism	Lipid metabolism	Glycerophospholipid metabolism	0	50
0.700865	0.993365	path:mmu01524	Human Diseases	Drug resistance	Platinum drug resistance	0	50
0.700865	0.993365	path:mmu03015	Genetic Information Processing	Translation	mRNA surveillance pathway	0	50
0.700865	0.993365	path:mmu04146	Cellular Processes	Transport and catabolism	Peroxisome	0	50
0.700865	0.993365	path:mmu04916	Organismal Systems	Endocrine system	Melanogenesis	0	50
0.705878	0.993365	path:mmu04064	Environmental Information Processing	Signal transduction	NF-kappa B signaling pathway	0	49
0.705878	0.993365	path:mmu04620	Organismal Systems	Immune system	Toll-like receptor signaling pathway	0	49
0.710927	0.993365	path:mmu04115	Cellular Processes	Cell growth and death	p53 signaling pathway	0	48
0.710927	0.993365	path:mmu04650	Organismal Systems	Immune system	Natural killer cell mediated cytotoxicity	0	48
0.72113	0.993365	path:mmu05211	Human Diseases	Cancers	Renal cell carcinoma	0	46
0.72113	0.993365	path:mmu05214	Human Diseases	Cancers	Glioma	0	46
0.726286	0.993365	path:mmu04713	Organismal Systems	Environmental adaptation	Circadian entrainment	0	45
0.726286	0.993365	path:mmu04750	Organismal Systems	Sensory system	Inflammatory mediator regulation of TRP channels	0	45
0.726286	0.993365	path:mmu04917	Organismal Systems	Endocrine system	Prolactin signaling pathway	0	45
0.726286	0.993365	path:mmu05218	Human Diseases	Cancers	Melanoma	0	45
0.726286	0.993365	path:mmu05221	Human Diseases	Cancers	Acute myeloid leukemia	0	45
0.731478	0.993365	path:mmu04137	Cellular Processes	Transport and catabolism	Mitophagy - animal	0	44
0.736707	0.993365	path:mmu04726	Organismal Systems	Nervous system	Serotonergic synapse	0	43
0.736707	0.993365	path:mmu05032	Human Diseases	Substance dependence	Morphine addiction	0	43
0.741973	0.993365	path:mmu04912	Organismal Systems	Endocrine system	GnRH signaling pathway	0	42
0.741973	0.993365	path:mmu05217	Human Diseases	Cancers	Basal cell carcinoma	0	42
0.747275	0.993365	path:mmu00562	Metabolism	Carbohydrate metabolism	Inositol phosphate metabolism	0	41
0.747275	0.993365	path:mmu03320	Organismal Systems	Endocrine system	PPAR signaling pathway	0	41
0.747275	0.993365	path:mmu04657	Organismal Systems	Immune system	IL-17 signaling pathway	0	41
0.747275	0.993365	path:mmu04727	Organismal Systems	Nervous system	GABAergic synapse	0	41
0.747275	0.993365	path:mmu04925	Organismal Systems	Endocrine system	Aldosterone synthesis and secretion	0	41
0.747275	0.993365	path:mmu05132	Human Diseases	Infectious diseases	Salmonella infection	0	41
0.747275	0.993365	path:mmu05230	Human Diseases	Cancers	Central carbon metabolism in cancer	0	41
0.752615	0.993365	path:mmu04662	Organismal Systems	Immune system	B cell receptor signaling pathway	0	40
0.757993	0.993365	path:mmu05213	Human Diseases	Cancers	Endometrial cancer	0	39
0.763408	0.993365	path:mmu05323	Human Diseases	Immune diseases	Rheumatoid arthritis	0	38
0.774354	0.993365	path:mmu00480	Metabolism	Metabolism of other amino acids	Glutathione metabolism	0	36
0.774354	0.993365	path:mmu01212	Mus Musculus	Metabolic pathways	Fatty acid metabolism	0	36
0.774354	0.993365	path:mmu04370	Environmental Information Processing	Signal transduction	VEGF signaling pathway	0	36
0.785454	0.993365	path:mmu00520	Metabolism	Carbohydrate metabolism	Amino sugar and nucleotide sugar metabolism	0	34
0.785454	0.993365	path:mmu00970	Genetic Information Processing	Translation	Aminoacyl-tRNA biosynthesis	0	34
0.791062	0.993365	path:mmu03050	Genetic Information Processing	Folding, sorting and degradation	Proteasome	0	33
0.79671	0.993365	path:mmu00280	Metabolism	Amino acid metabolism	Valine, leucine and isoleucine degradation	0	32
0.79671	0.993365	path:mmu00561	Metabolism	Lipid metabolism	Glycerolipid metabolism	0	32
0.79671	0.993365	path:mmu04340	Environmental Information Processing	Signal transduction	Hedgehog signaling pathway	0	32
0.79671	0.993365	path:mmu04640	Organismal Systems	Immune system	Hematopoietic cell lineage	0	32
0.802398	0.993365	path:mmu04623	Organismal Systems	Immune system	Cytosolic DNA-sensing pathway	0	31
0.802398	0.993365	path:mmu04720	Organismal Systems	Nervous system	Long-term potentiation	0	31
0.808126	0.993365	path:mmu04622	Organismal Systems	Immune system	RIG-I-like receptor signaling pathway	0	30
0.808126	0.993365	path:mmu04664	Organismal Systems	Immune system	Fc epsilon RI signaling pathway	0	30
0.808126	0.993365	path:mmu04730	Organismal Systems	Nervous system	Long-term depression	0	30
0.808126	0.993365	path:mmu04924	Organismal Systems	Endocrine system	Renin secretion	0	30
0.813894	0.993365	path:mmu00071	Metabolism	Lipid metabolism	Fatty acid degradation	0	29
0.813894	0.993365	path:mmu00510	Metabolism	Glycan biosynthesis and metabolism	N-Glycan biosynthesis	0	29
0.813894	0.993365	path:mmu04216	Cellular Processes	Cell growth and death	Ferroptosis	0	29
0.813894	0.993365	path:mmu05140	Human Diseases	Infectious diseases	Leishmaniasis	0	29
0.819702	0.993365	path:mmu00310	Metabolism	Amino acid metabolism	Lysine degradation	0	28
0.819702	0.993365	path:mmu05219	Human Diseases	Cancers	Bladder cancer	0	28
0.831442	0.993365	path:mmu05031	Human Diseases	Substance dependence	Amphetamine addiction	0	26
0.831442	0.993365	path:mmu05321	Human Diseases	Immune diseases	Inflammatory bowel disease (IBD)	0	26
0.837374	0.993365	path:mmu00270	Metabolism	Amino acid metabolism	Cysteine and methionine metabolism	0	25
0.837374	0.993365	path:mmu00600	Metabolism	Lipid metabolism	Sphingolipid metabolism	0	25
0.837374	0.993365	path:mmu00980	Metabolism	Xenobiotics biodegradation and metabolism	Metabolism of xenobiotics by cytochrome P450	0	25
0.837374	0.993365	path:mmu02010	Environmental Information Processing	Membrane transport	ABC transporters	0	25
0.837374	0.993365	path:mmu05204	Human Diseases	Cancers	Chemical carcinogenesis	0	25
0.837374	0.993365	path:mmu05416	Human Diseases	Cardiovascular diseases	Viral myocarditis	0	25
0.843348	0.993365	path:mmu03020	Genetic Information Processing	Transcription	RNA polymerase	0	24
0.843348	0.993365	path:mmu03420	Genetic Information Processing	Replication and repair	Nucleotide excision repair	0	24
0.843348	0.993365	path:mmu03460	Genetic Information Processing	Replication and repair	Fanconi anemia pathway	0	24
0.843348	0.993365	path:mmu05322	Human Diseases	Immune diseases	Systemic lupus erythematosus	0	24
0.849363	0.993365	path:mmu00260	Metabolism	Amino acid metabolism	Glycine, serine and threonine metabolism	0	23
0.849363	0.993365	path:mmu00620	Metabolism	Carbohydrate metabolism	Pyruvate metabolism	0	23
0.849363	0.993365	path:mmu03440	Genetic Information Processing	Replication and repair	Homologous recombination	0	23
0.849363	0.993365	path:mmu05216	Human Diseases	Cancers	Thyroid cancer	0	23
0.855421	0.993365	path:mmu00590	Metabolism	Lipid metabolism	Arachidonic acid metabolism	0	22
0.855421	0.993365	path:mmu03030	Genetic Information Processing	Replication and repair	DNA replication	0	22
0.861522	0.993365	path:mmu00860	Metabolism	Metabolism of cofactors and vitamins	Porphyrin and chlorophyll metabolism	0	21
0.861522	0.993365	path:mmu01523	Human Diseases	Drug resistance	Antifolate resistance	0	21
0.861522	0.993365	path:mmu05030	Human Diseases	Substance dependence	Cocaine addiction	0	21
0.861522	0.993365	path:mmu05144	Human Diseases	Infectious diseases	Malaria	0	21
0.867665	0.993365	path:mmu00410	Metabolism	Metabolism of other amino acids	beta-Alanine metabolism	0	20
0.867665	0.993365	path:mmu00982	Metabolism	Xenobiotics biodegradation and metabolism	Drug metabolism - cytochrome P450	0	20
0.867665	0.993365	path:mmu03022	Genetic Information Processing	Transcription	Basal transcription factors	0	20
0.867665	0.993365	path:mmu04610	Organismal Systems	Immune system	Complement and coagulation cascades	0	20
0.867665	0.993365	path:mmu04962	Organismal Systems	Excretory system	Vasopressin-regulated water reabsorption	0	20
0.873851	0.993365	path:mmu00052	Metabolism	Carbohydrate metabolism	Galactose metabolism	0	19
0.873851	0.993365	path:mmu00640	Metabolism	Carbohydrate metabolism	Propanoate metabolism	0	19
0.873851	0.993365	path:mmu00983	Metabolism	Xenobiotics biodegradation and metabolism	Drug metabolism - other enzymes	0	19
0.873851	0.993365	path:mmu03410	Genetic Information Processing	Replication and repair	Base excision repair	0	19
0.873851	0.993365	path:mmu04710	Organismal Systems	Environmental adaptation	Circadian rhythm	0	19
0.873851	0.993365	path:mmu04913	Organismal Systems	Endocrine system	Ovarian steroidogenesis	0	19
0.880081	0.993365	path:mmu04130	Genetic Information Processing	Folding, sorting and degradation	SNARE interactions in vesicular transport	0	18
0.880081	0.993365	path:mmu04215	Cellular Processes	Cell growth and death	Apoptosis - multiple species	0	18
0.880081	0.993365	path:mmu04740	Organismal Systems	Sensory system	Olfactory transduction	0	18
0.886355	0.993365	path:mmu00051	Metabolism	Carbohydrate metabolism	Fructose and mannose metabolism	0	17
0.886355	0.993365	path:mmu00532	Metabolism	Glycan biosynthesis and metabolism	Glycosaminoglycan biosynthesis - chondroitin sulfate / dermatan sulfate	0	17
0.886355	0.993365	path:mmu00565	Metabolism	Lipid metabolism	Ether lipid metabolism	0	17
0.886355	0.993365	path:mmu04392	Environmental Information Processing	Signal transduction	Hippo signaling pathway - multiple species	0	17
0.892672	0.993365	path:mmu00380	Metabolism	Amino acid metabolism	Tryptophan metabolism	0	16
0.892672	0.993365	path:mmu00512	Metabolism	Glycan biosynthesis and metabolism	Mucin type O-glycan biosynthesis	0	16
0.892672	0.993365	path:mmu00563	Metabolism	Glycan biosynthesis and metabolism	Glycosylphosphatidylinositol (GPI)-anchor biosynthesis	0	16
0.892672	0.993365	path:mmu05020	Human Diseases	Neurodegenerative diseases	Prion diseases	0	16
0.899034	0.993365	path:mmu00030	Metabolism	Carbohydrate metabolism	Pentose phosphate pathway	0	15
0.899034	0.993365	path:mmu00534	Metabolism	Glycan biosynthesis and metabolism	Glycosaminoglycan biosynthesis - heparan sulfate / heparin	0	15
0.899034	0.993365	path:mmu00900	Metabolism	Metabolism of terpenoids and polyketides	Terpenoid backbone biosynthesis	0	15
0.899034	0.993365	path:mmu04136	Cellular Processes	Transport and catabolism	Autophagy - other	0	15
0.905441	0.993365	path:mmu00350	Metabolism	Amino acid metabolism	Tyrosine metabolism	0	14
0.905441	0.993365	path:mmu00531	Metabolism	Glycan biosynthesis and metabolism	Glycosaminoglycan degradation	0	14
0.905441	0.993365	path:mmu00601	Metabolism	Glycan biosynthesis and metabolism	Glycosphingolipid biosynthesis - lacto and neolacto series	0	14
0.905441	0.993365	path:mmu03060	Genetic Information Processing	Folding, sorting and degradation	Protein export	0	14
0.905441	0.993365	path:mmu04742	Organismal Systems	Sensory system	Taste transduction	0	14
0.911893	0.993365	path:mmu00100	Metabolism	Lipid metabolism	Steroid biosynthesis	0	13
0.911893	0.993365	path:mmu00511	Metabolism	Glycan biosynthesis and metabolism	Other glycan degradation	0	13
0.911893	0.993365	path:mmu00670	Metabolism	Metabolism of cofactors and vitamins	One carbon pool by folate	0	13
0.911893	0.993365	path:mmu00760	Metabolism	Metabolism of cofactors and vitamins	Nicotinate and nicotinamide metabolism	0	13
0.911893	0.993365	path:mmu01040	Metabolism	Lipid metabolism	Biosynthesis of unsaturated fatty acids	0	13
0.918389	0.993365	path:mmu00062	Metabolism	Lipid metabolism	Fatty acid elongation	0	12
0.918389	0.993365	path:mmu00514	Metabolism	Glycan biosynthesis and metabolism	Other types of O-glycan biosynthesis	0	12
0.918389	0.993365	path:mmu04940	Human Diseases	Endocrine and metabolic diseases	Type I diabetes mellitus	0	12
0.924932	0.993365	path:mmu00040	Metabolism	Carbohydrate metabolism	Pentose and glucuronate interconversions	0	11
0.924932	0.993365	path:mmu00061	Metabolism	Lipid metabolism	Fatty acid biosynthesis	0	11
0.924932	0.993365	path:mmu00340	Metabolism	Amino acid metabolism	Histidine metabolism	0	11
0.924932	0.993365	path:mmu00650	Metabolism	Carbohydrate metabolism	Butanoate metabolism	0	11
0.924932	0.993365	path:mmu04614	Organismal Systems	Endocrine system	Renin-angiotensin system	0	11
0.924932	0.993365	path:mmu04672	Organismal Systems	Immune system	Intestinal immune network for IgA production	0	11
0.924932	0.993365	path:mmu04966	Organismal Systems	Excretory system	Collecting duct acid secretion	0	11
0.924932	0.993365	path:mmu04975	Organismal Systems	Digestive system	Fat digestion and absorption	0	11
0.924932	0.993365	path:mmu05143	Human Diseases	Infectious diseases	African trypanosomiasis	0	11
0.924932	0.993365	path:mmu05340	Human Diseases	Immune diseases	Primary immunodeficiency	0	11
0.93152	0.993365	path:mmu00140	Metabolism	Lipid metabolism	Steroid hormone biosynthesis	0	10
0.93152	0.993365	path:mmu00515	Metabolism	Glycan biosynthesis and metabolism	Mannose type O-glycan biosynthesis	0	10
0.93152	0.993365	path:mmu00533	Metabolism	Glycan biosynthesis and metabolism	Glycosaminoglycan biosynthesis - keratan sulfate	0	10
0.93152	0.993365	path:mmu00604	Metabolism	Glycan biosynthesis and metabolism	Glycosphingolipid biosynthesis - ganglio series	0	10
0.93152	0.993365	path:mmu00730	Metabolism	Metabolism of cofactors and vitamins	Thiamine metabolism	0	10
0.93152	0.993365	path:mmu00790	Metabolism	Metabolism of cofactors and vitamins	Folate biosynthesis	0	10
0.93152	0.993365	path:mmu03430	Genetic Information Processing	Replication and repair	Mismatch repair	0	10
0.93152	0.993365	path:mmu04977	Organismal Systems	Digestive system	Vitamin digestion and absorption	0	10
0.93152	0.993365	path:mmu05033	Human Diseases	Substance dependence	Nicotine addiction	0	10
0.938155	0.993365	path:mmu00120	Metabolism	Lipid metabolism	Primary bile acid biosynthesis	0	9
0.938155	0.993365	path:mmu00130	Metabolism	Metabolism of cofactors and vitamins	Ubiquinone and other terpenoid-quinone biosynthesis	0	9
0.938155	0.993365	path:mmu05150	Human Diseases	Infectious diseases	Staphylococcus aureus infection	0	9
0.938155	0.993365	path:mmu05320	Human Diseases	Immune diseases	Autoimmune thyroid disease	0	9
0.938155	0.993365	path:mmu05332	Human Diseases	Immune diseases	Graft-versus-host disease	0	9
0.944836	0.993365	path:mmu00360	Metabolism	Amino acid metabolism	Phenylalanine metabolism	0	8
0.944836	0.993365	path:mmu00450	Metabolism	Metabolism of other amino acids	Selenocompound metabolism	0	8
0.944836	0.993365	path:mmu00592	Metabolism	Lipid metabolism	alpha-Linolenic acid metabolism	0	8
0.944836	0.993365	path:mmu05330	Human Diseases	Immune diseases	Allograft rejection	0	8
0.951564	0.993365	path:mmu00053	Metabolism	Carbohydrate metabolism	Ascorbate and aldarate metabolism	0	7
0.951564	0.993365	path:mmu00603	Metabolism	Glycan biosynthesis and metabolism	Glycosphingolipid biosynthesis - globo and isoglobo series	0	7
0.951564	0.993365	path:mmu00770	Metabolism	Metabolism of cofactors and vitamins	Pantothenate and CoA biosynthesis	0	7
0.958339	0.993365	path:mmu00072	Metabolism	Lipid metabolism	Synthesis and degradation of ketone bodies	0	6
0.958339	0.993365	path:mmu00750	Metabolism	Metabolism of cofactors and vitamins	Vitamin B6 metabolism	0	6
0.958339	0.993365	path:mmu00920	Metabolism	Energy metabolism	Sulfur metabolism	0	6
0.958339	0.993365	path:mmu03450	Genetic Information Processing	Replication and repair	Non-homologous end-joining	0	6
0.958339	0.993365	path:mmu04122	Genetic Information Processing	Folding, sorting and degradation	Sulfur relay system	0	6
0.965162	0.993365	path:mmu00430	Metabolism	Metabolism of other amino acids	Taurine and hypotaurine metabolism	0	5
0.965162	0.993365	path:mmu00440	Metabolism	Metabolism of other amino acids	Phosphonate and phosphinate metabolism	0	5
0.965162	0.993365	path:mmu00591	Metabolism	Lipid metabolism	Linoleic acid metabolism	0	5
0.965162	0.993365	path:mmu00740	Metabolism	Metabolism of cofactors and vitamins	Riboflavin metabolism	0	5
0.965162	0.993365	path:mmu04744	Organismal Systems	Sensory system	Phototransduction	0	5
0.985919	0.995338	path:mmu00232	Metabolism	Biosynthesis of other secondary metabolites	Caffeine metabolism	0	2
0.985919	0.995338	path:mmu00400	Metabolism	Amino acid metabolism	Phenylalanine, tyrosine and tryptophan biosynthesis	0	2
0.985919	0.995338	path:mmu00471	Metabolism	Metabolism of other amino acids	D-Glutamine and D-glutamate metabolism	0	2
0.985919	0.995338	path:mmu00524	Metabolism	Biosynthesis of other secondary metabolites	Neomycin, kanamycin and gentamicin biosynthesis	0	2
0.985919	0.995338	path:mmu00785	Metabolism	Metabolism of cofactors and vitamins	Lipoic acid metabolism	0	2
0.985919	0.995338	path:mmu05310	Human Diseases	Immune diseases	Asthma	0	2
0.992935	0.996077	path:mmu00290	Metabolism	Amino acid metabolism	Valine, leucine and isoleucine biosynthesis	0	1
0.992935	0.996077	path:mmu00780	Metabolism	Metabolism of cofactors and vitamins	Biotin metabolism	0	1
1	1	path:mmu00472	Metabolism	Metabolism of other amino acids	D-Arginine and D-ornithine metabolism	0	0

## Sheet: KEGG_module_7
pv	pv_fdr	term	Brite1	Brite2	kegg_name	hits	BG	Symbols
2.05392e-16	6.51092e-14	path:mmu05164	Human Diseases	Infectious diseases	Influenza A	14	83	Adar,Cxcl10,Ddx58,Eif2ak2,Ifih1,Irf7,Irf9,Mx2,Oas1a,Oas1b,Rsad2,Stat1,Stat2,Tlr3
1.89882e-14	3.00964e-12	path:mmu05168	Human Diseases	Infectious diseases	Herpes simplex infection	13	89	Ddx58,Eif2ak2,H2-K1,Ifih1,Ifit1,Irf7,Irf9,Oas1a,Oas1b,Sp100,Stat1,Stat2,Tlr3
8.42671e-13	8.90422e-11	path:mmu05162	Human Diseases	Infectious diseases	Measles	11	69	Adar,Ddx58,Eif2ak2,Ifih1,Irf7,Irf9,Mx2,Oas1a,Oas1b,Stat1,Stat2
2.67369e-11	2.1189e-09	path:mmu05160	Human Diseases	Infectious diseases	Hepatitis C	10	69	Ddx58,Eif2ak2,Ifit1,Irf7,Irf9,Oas1a,Oas1b,Stat1,Stat2,Tlr3
6.05336e-09	3.83783e-07	path:mmu04621	Organismal Systems	Immune system	NOD-like receptor signaling pathway	9	87	Gbp2,Gbp3,Ifi204,Irf7,Irf9,Oas1a,Oas1b,Stat1,Stat2
4.18571e-08	2.21145e-06	path:mmu04622	Organismal Systems	Immune system	RIG-I-like receptor signaling pathway	6	30	Cxcl10,Ddx58,Dhx58,Ifih1,Irf7,Isg15
1.0765e-07	4.875e-06	path:mmu05165	Human Diseases	Infectious diseases	Human papillomavirus infection	11	205	Dlg2,Eif2ak2,H2-K1,Irf9,Isg15,Mx2,Oasl1,Oasl2,Stat1,Stat2,Tlr3
1.86339e-06	7.38366e-05	path:mmu04623	Organismal Systems	Immune system	Cytosolic DNA-sensing pathway	5	31	Adar,Cxcl10,Ddx58,Irf7,Zbp1
5.58721e-06	0.000196794	path:mmu05167	Human Diseases	Infectious diseases	Kaposi's sarcoma-associated herpesvirus infection	7	103	Eif2ak2,H2-K1,Irf7,Irf9,Stat1,Stat2,Tlr3
1.24439e-05	0.000394472	path:mmu04217	Cellular Processes	Cell growth and death	Necroptosis	6	77	Eif2ak2,Irf9,Stat1,Stat2,Tlr3,Zbp1
2.82801e-05	0.00081498	path:mmu05161	Human Diseases	Infectious diseases	Hepatitis B	6	89	Ddx58,Ifih1,Irf7,Stat1,Stat2,Tlr3
0.00031837	0.00841027	path:mmu04620	Organismal Systems	Immune system	Toll-like receptor signaling pathway	4	49	Cxcl10,Irf7,Stat1,Tlr3
0.000778079	0.0189732	path:mmu05203	Human Diseases	Cancers	Viral carcinogenesis	5	109	Eif2ak2,H2-K1,Irf7,Irf9,Sp100
0.00271933	0.0615735	path:mmu04062	Organismal Systems	Immune system	Chemokine signaling pathway	4	88	Ccl17,Cxcl10,Stat1,Stat2
0.0116395	0.245982	path:mmu04380	Organismal Systems	Development	Osteoclast differentiation	3	72	Irf9,Stat1,Stat2
0.0128102	0.253802	path:mmu05321	Human Diseases	Immune diseases	Inflammatory bowel disease (IBD)	2	26	Il18rap,Stat1
0.013812	0.257552	path:mmu04630	Environmental Information Processing	Signal transduction	Jak-STAT signaling pathway	3	77	Irf9,Stat1,Stat2
0.0177259	0.312172	path:mmu04330	Environmental Information Processing	Signal transduction	Notch signaling pathway	2	31	Dtx3l,Psen2
0.0187323	0.312534	path:mmu04060	Environmental Information Processing	Signaling molecules and interaction	Cytokine-cytokine receptor interaction	3	87	Ccl17,Cxcl10,Il18rap
0.0292355	0.463383	path:mmu04657	Organismal Systems	Immune system	IL-17 signaling pathway	2	41	Ccl17,Cxcl10
0.0397566	0.596077	path:mmu00072	Metabolism	Lipid metabolism	Synthesis and degradation of ketone bodies	1	6	Hmgcll1
0.0413681	0.596077	path:mmu05169	Human Diseases	Infectious diseases	Epstein-Barr virus infection	3	122	Ddx58,Eif2ak2,H2-K1
0.0522952	0.71409	path:mmu05330	Human Diseases	Immune diseases	Allograft rejection	1	8	H2-K1
0.0584348	0.71409	path:mmu05320	Human Diseases	Immune diseases	Autoimmune thyroid disease	1	9	H2-K1
0.0584348	0.71409	path:mmu05332	Human Diseases	Immune diseases	Graft-versus-host disease	1	9	H2-K1
0.0585689	0.71409	path:mmu05145	Human Diseases	Infectious diseases	Toxoplasmosis	2	62	Igtp,Stat1
0.0704585	0.827235	path:mmu00650	Metabolism	Carbohydrate metabolism	Butanoate metabolism	1	11	Hmgcll1
0.0763445	0.864329	path:mmu04940	Human Diseases	Endocrine and metabolic diseases	Type I diabetes mellitus	1	12	H2-K1
0.0935868	0.995761	path:mmu01100	Mus Musculus	Metabolic pathways	Metabolic pathways	2	691	Cmpk2,Hmgcll1
0.140751	0.995761	path:mmu05322	Human Diseases	Immune diseases	Systemic lupus erythematosus	1	24	Trim21
0.145623	0.995761	path:mmu05416	Human Diseases	Cardiovascular diseases	Viral myocarditis	1	25	H2-K1
0.150424	0.995761	path:mmu04612	Organismal Systems	Immune system	Antigen processing and presentation	1	26	H2-K1
0.164396	0.995761	path:mmu05140	Human Diseases	Infectious diseases	Leishmaniasis	1	29	Stat1
0.177743	0.995761	path:mmu00280	Metabolism	Amino acid metabolism	Valine, leucine and isoleucine degradation	1	32	Hmgcll1
0.182057	0.995761	path:mmu03050	Genetic Information Processing	Folding, sorting and degradation	Proteasome	1	33	Psmb8
0.228807	0.995761	path:mmu04917	Organismal Systems	Endocrine system	Prolactin signaling pathway	1	45	Stat1
0.235746	0.995761	path:mmu04658	Organismal Systems	Immune system	Th1 and Th2 cell differentiation	1	47	Stat1
0.239129	0.995761	path:mmu04650	Organismal Systems	Immune system	Natural killer cell mediated cytotoxicity	1	48	H2-K1
0.240406	0.995761	path:mmu04151	Environmental Information Processing	Signal transduction	PI3K-Akt signaling pathway	0	205
0.242455	0.995761	path:mmu04064	Environmental Information Processing	Signal transduction	NF-kappa B signaling pathway	1	49	Ddx58
0.245724	0.995761	path:mmu04146	Cellular Processes	Transport and catabolism	Peroxisome	1	50	Hmgcll1
0.245724	0.995761	path:mmu04514	Environmental Information Processing	Signaling molecules and interaction	Cell adhesion molecules (CAMs)	1	50	H2-K1
0.264193	0.995761	path:mmu04659	Organismal Systems	Immune system	Th17 cell differentiation	1	56	Stat1
0.264193	0.995761	path:mmu05212	Human Diseases	Cancers	Pancreatic cancer	1	56	Stat1
0.272715	0.995761	path:mmu04270	Organismal Systems	Circulatory system	Vascular smooth muscle contraction	1	59	Ramp3
0.272803	0.995761	path:mmu04010	Environmental Information Processing	Signal transduction	MAPK signaling pathway	0	187
0.295611	0.995761	path:mmu00240	Metabolism	Nucleotide metabolism	Pyrimidine metabolism	1	68	Cmpk2
0.300182	0.995761	path:mmu04933	Human Diseases	Endocrine and metabolic diseases	AGE-RAGE signaling pathway in diabetic complications	1	70	Stat1
0.304574	0.995761	path:mmu04145	Cellular Processes	Transport and catabolism	Phagosome	1	72	H2-K1
0.306704	0.995761	path:mmu04722	Organismal Systems	Nervous system	Neurotrophin signaling pathway	1	73	Psen2
0.310835	0.995761	path:mmu05012	Human Diseases	Neurodegenerative diseases	Parkinson's disease	1	75	Ube2l6
0.312837	0.995761	path:mmu04668	Environmental Information Processing	Signal transduction	TNF signaling pathway	1	76	Cxcl10
0.315732	0.995761	path:mmu05200	Human Diseases	Cancers	Pathways in cancer	1	244	Stat1
0.316715	0.995761	path:mmu04120	Genetic Information Processing	Folding, sorting and degradation	Ubiquitin mediated proteolysis	1	78	Ube2l6
0.316715	0.995761	path:mmu05152	Human Diseases	Infectious diseases	Tuberculosis	1	78	Stat1
0.32043	0.995761	path:mmu04919	Organismal Systems	Endocrine system	Thyroid hormone signaling pathway	1	80	Stat1
0.338097	0.995761	path:mmu04390	Environmental Information Processing	Signal transduction	Hippo signaling pathway	1	91	Dlg2
0.338097	0.995761	path:mmu04530	Cellular Processes	Cellular community - eukaryotes	Tight junction	1	91	Dlg2
0.347082	0.995761	path:mmu05010	Human Diseases	Neurodegenerative diseases	Alzheimer's disease	1	98	Psen2
0.353512	0.995761	path:mmu04218	Cellular Processes	Cell growth and death	Cellular senescence	1	104	H2-K1
0.358853	0.995761	path:mmu04141	Genetic Information Processing	Folding, sorting and degradation	Protein processing in endoplasmic reticulum	1	110	Eif2ak2
0.370231	0.995761	path:mmu05166	Human Diseases	Infectious diseases	HTLV-I infection	1	160	H2-K1
0.370873	0.995761	path:mmu04144	Cellular Processes	Transport and catabolism	Endocytosis	1	157	H2-K1
0.379057	0.995761	path:mmu05205	Human Diseases	Cancers	Proteoglycans in cancer	0	140
0.398034	0.995761	path:mmu04360	Organismal Systems	Development	Axon guidance	0	133
0.403625	0.995761	path:mmu04510	Cellular Processes	Cellular community - eukaryotes	Focal adhesion	0	131
0.40645	0.995761	path:mmu04014	Environmental Information Processing	Signal transduction	Ras signaling pathway	0	130
0.415041	0.995761	path:mmu04015	Environmental Information Processing	Signal transduction	Rap1 signaling pathway	0	127
0.426775	0.995761	path:mmu04810	Cellular Processes	Cell motility	Regulation of actin cytoskeleton	0	123
0.429759	0.995761	path:mmu05225	Human Diseases	Cancers	Hepatocellular carcinoma	0	122
0.473758	0.995761	path:mmu00230	Metabolism	Nucleotide metabolism	Purine metabolism	0	108
0.477066	0.995761	path:mmu05206	Human Diseases	Cancers	MicroRNAs in cancer	0	107
0.500862	0.995761	path:mmu05202	Human Diseases	Cancers	Transcriptional misregulation in cancer	0	100
0.511414	0.995761	path:mmu04150	Environmental Information Processing	Signal transduction	mTOR signaling pathway	0	97
0.51498	0.995761	path:mmu05016	Human Diseases	Neurodegenerative diseases	Huntington's disease	0	96
0.518571	0.995761	path:mmu04932	Human Diseases	Endocrine and metabolic diseases	Non-alcoholic fatty liver disease (NAFLD)	0	95
0.518571	0.995761	path:mmu05224	Human Diseases	Cancers	Breast cancer	0	95
0.522186	0.995761	path:mmu03010	Genetic Information Processing	Translation	Ribosome	0	94
0.522186	0.995761	path:mmu04310	Environmental Information Processing	Signal transduction	Wnt signaling pathway	0	94
0.525826	0.995761	path:mmu03013	Genetic Information Processing	Translation	RNA transport	0	93
0.536896	0.995761	path:mmu04024	Environmental Information Processing	Signal transduction	cAMP signaling pathway	0	90
0.536896	0.995761	path:mmu05418	Human Diseases	Cardiovascular diseases	Fluid shear stress and atherosclerosis	0	90
0.544403	0.995761	path:mmu04022	Environmental Information Processing	Signal transduction	cGMP-PKG signaling pathway	0	88
0.544403	0.995761	path:mmu04142	Cellular Processes	Transport and catabolism	Lysosome	0	88
0.544403	0.995761	path:mmu04550	Cellular Processes	Cellular community - eukaryotes	Signaling pathways regulating pluripotency of stem cells	0	88
0.544403	0.995761	path:mmu04910	Organismal Systems	Endocrine system	Insulin signaling pathway	0	88
0.548196	0.995761	path:mmu04068	Environmental Information Processing	Signal transduction	FoxO signaling pathway	0	87
0.548196	0.995761	path:mmu04210	Cellular Processes	Cell growth and death	Apoptosis	0	87
0.571502	0.995761	path:mmu04072	Environmental Information Processing	Signal transduction	Phospholipase D signaling pathway	0	81
0.571502	0.995761	path:mmu04140	Cellular Processes	Transport and catabolism	Autophagy - animal	0	81
0.57548	0.995761	path:mmu04926	Organismal Systems	Endocrine system	Relaxin signaling pathway	0	80
0.579486	0.995761	path:mmu04152	Environmental Information Processing	Signal transduction	AMPK signaling pathway	0	79
0.583518	0.995761	path:mmu04020	Environmental Information Processing	Signal transduction	Calcium signaling pathway	0	78
0.587579	0.995761	path:mmu04110	Cellular Processes	Cell growth and death	Cell cycle	0	77
0.587579	0.995761	path:mmu04371	Environmental Information Processing	Signal transduction	Apelin signaling pathway	0	77
0.591667	0.995761	path:mmu04921	Organismal Systems	Endocrine system	Oxytocin signaling pathway	0	76
0.599928	0.995761	path:mmu00190	Metabolism	Energy metabolism	Oxidative phosphorylation	0	74
0.612532	0.995761	path:mmu04723	Organismal Systems	Nervous system	Retrograde endocannabinoid signaling	0	71
0.616792	0.995761	path:mmu04066	Environmental Information Processing	Signal transduction	HIF-1 signaling pathway	0	70
0.62108	0.995761	path:mmu04261	Organismal Systems	Circulatory system	Adrenergic signaling in cardiomyocytes	0	69
0.62108	0.995761	path:mmu04931	Human Diseases	Endocrine and metabolic diseases	Insulin resistance	0	69
0.625398	0.995761	path:mmu01200	Mus Musculus	Metabolic pathways	Carbon metabolism	0	68
0.629745	0.995761	path:mmu04071	Environmental Information Processing	Signal transduction	Sphingolipid signaling pathway	0	67
0.629745	0.995761	path:mmu05215	Human Diseases	Cancers	Prostate cancer	0	67
0.634122	0.995761	path:mmu05222	Human Diseases	Cancers	Small cell lung cancer	0	66
0.642966	0.995761	path:mmu03040	Genetic Information Processing	Transcription	Spliceosome	0	64
0.647433	0.995761	path:mmu01521	Human Diseases	Drug resistance	EGFR tyrosine kinase inhibitor resistance	0	63
0.647433	0.995761	path:mmu04114	Cellular Processes	Cell growth and death	Oocyte meiosis	0	63
0.647433	0.995761	path:mmu04611	Organismal Systems	Immune system	Platelet activation	0	63
0.647433	0.995761	path:mmu04728	Organismal Systems	Nervous system	Dopaminergic synapse	0	63
0.651931	0.995761	path:mmu01522	Human Diseases	Drug resistance	Endocrine resistance	0	62
0.65646	0.995761	path:mmu05231	Human Diseases	Cancers	Choline metabolism in cancer	0	61
0.66102	0.995761	path:mmu04070	Environmental Information Processing	Signal transduction	Phosphatidylinositol signaling system	0	60
0.66102	0.995761	path:mmu05220	Human Diseases	Cancers	Chronic myeloid leukemia	0	60
0.66561	0.995761	path:mmu05034	Human Diseases	Substance dependence	Alcoholism	0	59
0.670233	0.995761	path:mmu04012	Environmental Information Processing	Signal transduction	ErbB signaling pathway	0	58
0.679572	0.995761	path:mmu04080	Environmental Information Processing	Signaling molecules and interaction	Neuroactive ligand-receptor interaction	0	56
0.679572	0.995761	path:mmu04211	Organismal Systems	Aging	Longevity regulating pathway	0	56
0.679572	0.995761	path:mmu04350	Environmental Information Processing	Signal transduction	TGF-beta signaling pathway	0	56
0.679572	0.995761	path:mmu04725	Organismal Systems	Nervous system	Cholinergic synapse	0	56
0.68429	0.995761	path:mmu03018	Genetic Information Processing	Folding, sorting and degradation	RNA degradation	0	55
0.68904	0.995761	path:mmu05146	Human Diseases	Infectious diseases	Amoebiasis	0	54
0.68904	0.995761	path:mmu05210	Human Diseases	Cancers	Colorectal cancer	0	54
0.693823	0.995761	path:mmu03008	Genetic Information Processing	Translation	Ribosome biogenesis in eukaryotes	0	53
0.693823	0.995761	path:mmu04512	Environmental Information Processing	Signaling molecules and interaction	ECM-receptor interaction	0	53
0.693823	0.995761	path:mmu04520	Cellular Processes	Cellular community - eukaryotes	Adherens junction	0	53
0.693823	0.995761	path:mmu04915	Organismal Systems	Endocrine system	Estrogen signaling pathway	0	53
0.698638	0.995761	path:mmu04666	Organismal Systems	Immune system	Fc gamma R-mediated phagocytosis	0	52
0.698638	0.995761	path:mmu04670	Organismal Systems	Immune system	Leukocyte transendothelial migration	0	52
0.698638	0.995761	path:mmu04724	Organismal Systems	Nervous system	Glutamatergic synapse	0	52
0.698638	0.995761	path:mmu04914	Organismal Systems	Endocrine system	Progesterone-mediated oocyte maturation	0	52
0.698638	0.995761	path:mmu05142	Human Diseases	Infectious diseases	Chagas disease (American trypanosomiasis)	0	52
0.698638	0.995761	path:mmu05414	Human Diseases	Cardiovascular diseases	Dilated cardiomyopathy (DCM)	0	52
0.703486	0.995761	path:mmu04660	Organismal Systems	Immune system	T cell receptor signaling pathway	0	51
0.703486	0.995761	path:mmu05100	Human Diseases	Infectious diseases	Bacterial invasion of epithelial cells	0	51
0.703486	0.995761	path:mmu05410	Human Diseases	Cardiovascular diseases	Hypertrophic cardiomyopathy (HCM)	0	51
0.708367	0.995761	path:mmu00564	Metabolism	Lipid metabolism	Glycerophospholipid metabolism	0	50
0.708367	0.995761	path:mmu01524	Human Diseases	Drug resistance	Platinum drug resistance	0	50
0.708367	0.995761	path:mmu03015	Genetic Information Processing	Translation	mRNA surveillance pathway	0	50
0.708367	0.995761	path:mmu04916	Organismal Systems	Endocrine system	Melanogenesis	0	50
0.713281	0.995761	path:mmu04922	Organismal Systems	Endocrine system	Glucagon signaling pathway	0	49
0.718229	0.995761	path:mmu04115	Cellular Processes	Cell growth and death	p53 signaling pathway	0	48
0.723211	0.995761	path:mmu04540	Cellular Processes	Cellular community - eukaryotes	Gap junction	0	47
0.723211	0.995761	path:mmu05412	Human Diseases	Cardiovascular diseases	Arrhythmogenic right ventricular cardiomyopathy (ARVC)	0	47
0.728227	0.995761	path:mmu05211	Human Diseases	Cancers	Renal cell carcinoma	0	46
0.728227	0.995761	path:mmu05214	Human Diseases	Cancers	Glioma	0	46
0.728227	0.995761	path:mmu05223	Human Diseases	Cancers	Non-small cell lung cancer	0	46
0.733277	0.995761	path:mmu01230	Mus Musculus	Metabolic pathways	Biosynthesis of amino acids	0	45
0.733277	0.995761	path:mmu04713	Organismal Systems	Environmental adaptation	Circadian entrainment	0	45
0.733277	0.995761	path:mmu04750	Organismal Systems	Sensory system	Inflammatory mediator regulation of TRP channels	0	45
0.733277	0.995761	path:mmu05218	Human Diseases	Cancers	Melanoma	0	45
0.733277	0.995761	path:mmu05221	Human Diseases	Cancers	Acute myeloid leukemia	0	45
0.738362	0.995761	path:mmu04137	Cellular Processes	Transport and catabolism	Mitophagy - animal	0	44
0.743481	0.995761	path:mmu04726	Organismal Systems	Nervous system	Serotonergic synapse	0	43
0.743481	0.995761	path:mmu05032	Human Diseases	Substance dependence	Morphine addiction	0	43
0.748635	0.995761	path:mmu04912	Organismal Systems	Endocrine system	GnRH signaling pathway	0	42
0.748635	0.995761	path:mmu04974	Organismal Systems	Digestive system	Protein digestion and absorption	0	42
0.748635	0.995761	path:mmu05217	Human Diseases	Cancers	Basal cell carcinoma	0	42
0.753825	0.995761	path:mmu00562	Metabolism	Carbohydrate metabolism	Inositol phosphate metabolism	0	41
0.753825	0.995761	path:mmu03320	Organismal Systems	Endocrine system	PPAR signaling pathway	0	41
0.753825	0.995761	path:mmu04727	Organismal Systems	Nervous system	GABAergic synapse	0	41
0.753825	0.995761	path:mmu04920	Organismal Systems	Endocrine system	Adipocytokine signaling pathway	0	41
0.753825	0.995761	path:mmu04925	Organismal Systems	Endocrine system	Aldosterone synthesis and secretion	0	41
0.753825	0.995761	path:mmu05132	Human Diseases	Infectious diseases	Salmonella infection	0	41
0.753825	0.995761	path:mmu05230	Human Diseases	Cancers	Central carbon metabolism in cancer	0	41
0.75905	0.995761	path:mmu04662	Organismal Systems	Immune system	B cell receptor signaling pathway	0	40
0.76431	0.995761	path:mmu04213	Organismal Systems	Aging	Longevity regulating pathway - multiple species	0	39
0.76431	0.995761	path:mmu05213	Human Diseases	Cancers	Endometrial cancer	0	39
0.769607	0.995761	path:mmu05323	Human Diseases	Immune diseases	Rheumatoid arthritis	0	38
0.780308	0.995761	path:mmu00480	Metabolism	Metabolism of other amino acids	Glutathione metabolism	0	36
0.780308	0.995761	path:mmu01212	Mus Musculus	Metabolic pathways	Fatty acid metabolism	0	36
0.780308	0.995761	path:mmu04370	Environmental Information Processing	Signal transduction	VEGF signaling pathway	0	36
0.785714	0.995761	path:mmu04260	Organismal Systems	Circulatory system	Cardiac muscle contraction	0	35
0.791156	0.995761	path:mmu00520	Metabolism	Carbohydrate metabolism	Amino sugar and nucleotide sugar metabolism	0	34
0.791156	0.995761	path:mmu00970	Genetic Information Processing	Translation	Aminoacyl-tRNA biosynthesis	0	34
0.791156	0.995761	path:mmu04923	Organismal Systems	Endocrine system	Regulation of lipolysis in adipocytes	0	34
0.791156	0.995761	path:mmu04970	Organismal Systems	Digestive system	Salivary secretion	0	34
0.796635	0.995761	path:mmu04911	Organismal Systems	Endocrine system	Insulin secretion	0	33
0.802152	0.995761	path:mmu00561	Metabolism	Lipid metabolism	Glycerolipid metabolism	0	32
0.802152	0.995761	path:mmu04340	Environmental Information Processing	Signal transduction	Hedgehog signaling pathway	0	32
0.802152	0.995761	path:mmu04640	Organismal Systems	Immune system	Hematopoietic cell lineage	0	32
0.807707	0.995761	path:mmu04720	Organismal Systems	Nervous system	Long-term potentiation	0	31
0.813299	0.995761	path:mmu00010	Metabolism	Carbohydrate metabolism	Glycolysis / Gluconeogenesis	0	30
0.813299	0.995761	path:mmu00330	Metabolism	Amino acid metabolism	Arginine and proline metabolism	0	30
0.813299	0.995761	path:mmu04664	Organismal Systems	Immune system	Fc epsilon RI signaling pathway	0	30
0.813299	0.995761	path:mmu04730	Organismal Systems	Nervous system	Long-term depression	0	30
0.813299	0.995761	path:mmu04918	Organismal Systems	Endocrine system	Thyroid hormone synthesis	0	30
0.813299	0.995761	path:mmu04924	Organismal Systems	Endocrine system	Renin secretion	0	30
0.81893	0.995761	path:mmu00071	Metabolism	Lipid metabolism	Fatty acid degradation	0	29
0.81893	0.995761	path:mmu00510	Metabolism	Glycan biosynthesis and metabolism	N-Glycan biosynthesis	0	29
0.81893	0.995761	path:mmu04216	Cellular Processes	Cell growth and death	Ferroptosis	0	29
0.81893	0.995761	path:mmu04721	Organismal Systems	Nervous system	Synaptic vesicle cycle	0	29
0.81893	0.995761	path:mmu04972	Organismal Systems	Digestive system	Pancreatic secretion	0	29
0.81893	0.995761	path:mmu05014	Human Diseases	Neurodegenerative diseases	Amyotrophic lateral sclerosis (ALS)	0	29
0.81893	0.995761	path:mmu05133	Human Diseases	Infectious diseases	Pertussis	0	29
0.824598	0.995761	path:mmu00310	Metabolism	Amino acid metabolism	Lysine degradation	0	28
0.824598	0.995761	path:mmu04971	Organismal Systems	Digestive system	Gastric acid secretion	0	28
0.824598	0.995761	path:mmu05219	Human Diseases	Cancers	Bladder cancer	0	28
0.836052	0.995761	path:mmu04930	Human Diseases	Endocrine and metabolic diseases	Type II diabetes mellitus	0	26
0.836052	0.995761	path:mmu04976	Organismal Systems	Digestive system	Bile secretion	0	26
0.836052	0.995761	path:mmu05031	Human Diseases	Substance dependence	Amphetamine addiction	0	26
0.836052	0.995761	path:mmu05134	Human Diseases	Infectious diseases	Legionellosis	0	26
0.841838	0.995761	path:mmu00270	Metabolism	Amino acid metabolism	Cysteine and methionine metabolism	0	25
0.841838	0.995761	path:mmu00600	Metabolism	Lipid metabolism	Sphingolipid metabolism	0	25
0.841838	0.995761	path:mmu00980	Metabolism	Xenobiotics biodegradation and metabolism	Metabolism of xenobiotics by cytochrome P450	0	25
0.841838	0.995761	path:mmu02010	Environmental Information Processing	Membrane transport	ABC transporters	0	25
0.841838	0.995761	path:mmu05204	Human Diseases	Cancers	Chemical carcinogenesis	0	25
0.847663	0.995761	path:mmu03020	Genetic Information Processing	Transcription	RNA polymerase	0	24
0.847663	0.995761	path:mmu03420	Genetic Information Processing	Replication and repair	Nucleotide excision repair	0	24
0.847663	0.995761	path:mmu03460	Genetic Information Processing	Replication and repair	Fanconi anemia pathway	0	24
0.853527	0.995761	path:mmu00250	Metabolism	Amino acid metabolism	Alanine, aspartate and glutamate metabolism	0	23
0.853527	0.995761	path:mmu00260	Metabolism	Amino acid metabolism	Glycine, serine and threonine metabolism	0	23
0.853527	0.995761	path:mmu00620	Metabolism	Carbohydrate metabolism	Pyruvate metabolism	0	23
0.853527	0.995761	path:mmu03440	Genetic Information Processing	Replication and repair	Homologous recombination	0	23
0.853527	0.995761	path:mmu05216	Human Diseases	Cancers	Thyroid cancer	0	23
0.859432	0.995761	path:mmu00590	Metabolism	Lipid metabolism	Arachidonic acid metabolism	0	22
0.859432	0.995761	path:mmu03030	Genetic Information Processing	Replication and repair	DNA replication	0	22
0.859432	0.995761	path:mmu04978	Organismal Systems	Digestive system	Mineral absorption	0	22
0.865377	0.995761	path:mmu00860	Metabolism	Metabolism of cofactors and vitamins	Porphyrin and chlorophyll metabolism	0	21
0.865377	0.995761	path:mmu01523	Human Diseases	Drug resistance	Antifolate resistance	0	21
0.865377	0.995761	path:mmu05030	Human Diseases	Substance dependence	Cocaine addiction	0	21
0.865377	0.995761	path:mmu05144	Human Diseases	Infectious diseases	Malaria	0	21
0.871362	0.995761	path:mmu00020	Metabolism	Carbohydrate metabolism	Citrate cycle (TCA cycle)	0	20
0.871362	0.995761	path:mmu00410	Metabolism	Metabolism of other amino acids	beta-Alanine metabolism	0	20
0.871362	0.995761	path:mmu00982	Metabolism	Xenobiotics biodegradation and metabolism	Drug metabolism - cytochrome P450	0	20
0.871362	0.995761	path:mmu03022	Genetic Information Processing	Transcription	Basal transcription factors	0	20
0.871362	0.995761	path:mmu04610	Organismal Systems	Immune system	Complement and coagulation cascades	0	20
0.871362	0.995761	path:mmu04960	Organismal Systems	Excretory system	Aldosterone-regulated sodium reabsorption	0	20
0.871362	0.995761	path:mmu04962	Organismal Systems	Excretory system	Vasopressin-regulated water reabsorption	0	20
0.877388	0.995761	path:mmu00052	Metabolism	Carbohydrate metabolism	Galactose metabolism	0	19
0.877388	0.995761	path:mmu00640	Metabolism	Carbohydrate metabolism	Propanoate metabolism	0	19
0.877388	0.995761	path:mmu00983	Metabolism	Xenobiotics biodegradation and metabolism	Drug metabolism - other enzymes	0	19
0.877388	0.995761	path:mmu03410	Genetic Information Processing	Replication and repair	Base excision repair	0	19
0.877388	0.995761	path:mmu04710	Organismal Systems	Environmental adaptation	Circadian rhythm	0	19
0.877388	0.995761	path:mmu04913	Organismal Systems	Endocrine system	Ovarian steroidogenesis	0	19
0.883455	0.995761	path:mmu04130	Genetic Information Processing	Folding, sorting and degradation	SNARE interactions in vesicular transport	0	18
0.883455	0.995761	path:mmu04215	Cellular Processes	Cell growth and death	Apoptosis - multiple species	0	18
0.883455	0.995761	path:mmu04740	Organismal Systems	Sensory system	Olfactory transduction	0	18
0.883455	0.995761	path:mmu04961	Organismal Systems	Excretory system	Endocrine and other factor-regulated calcium reabsorption	0	18
0.889563	0.995761	path:mmu00051	Metabolism	Carbohydrate metabolism	Fructose and mannose metabolism	0	17
0.889563	0.995761	path:mmu00532	Metabolism	Glycan biosynthesis and metabolism	Glycosaminoglycan biosynthesis - chondroitin sulfate / dermatan sulfate	0	17
0.889563	0.995761	path:mmu00565	Metabolism	Lipid metabolism	Ether lipid metabolism	0	17
0.889563	0.995761	path:mmu00630	Metabolism	Carbohydrate metabolism	Glyoxylate and dicarboxylate metabolism	0	17
0.889563	0.995761	path:mmu04392	Environmental Information Processing	Signal transduction	Hippo signaling pathway - multiple species	0	17
0.889563	0.995761	path:mmu04973	Organismal Systems	Digestive system	Carbohydrate digestion and absorption	0	17
0.895713	0.995761	path:mmu00380	Metabolism	Amino acid metabolism	Tryptophan metabolism	0	16
0.895713	0.995761	path:mmu00500	Metabolism	Carbohydrate metabolism	Starch and sucrose metabolism	0	16
0.895713	0.995761	path:mmu00512	Metabolism	Glycan biosynthesis and metabolism	Mucin type O-glycan biosynthesis	0	16
0.895713	0.995761	path:mmu00563	Metabolism	Glycan biosynthesis and metabolism	Glycosylphosphatidylinositol (GPI)-anchor biosynthesis	0	16
0.895713	0.995761	path:mmu05020	Human Diseases	Neurodegenerative diseases	Prion diseases	0	16
0.901905	0.995761	path:mmu00030	Metabolism	Carbohydrate metabolism	Pentose phosphate pathway	0	15
0.901905	0.995761	path:mmu00534	Metabolism	Glycan biosynthesis and metabolism	Glycosaminoglycan biosynthesis - heparan sulfate / heparin	0	15
0.901905	0.995761	path:mmu00830	Metabolism	Metabolism of cofactors and vitamins	Retinol metabolism	0	15
0.901905	0.995761	path:mmu00900	Metabolism	Metabolism of terpenoids and polyketides	Terpenoid backbone biosynthesis	0	15
0.901905	0.995761	path:mmu04136	Cellular Processes	Transport and catabolism	Autophagy - other	0	15
0.908139	0.995761	path:mmu00350	Metabolism	Amino acid metabolism	Tyrosine metabolism	0	14
0.908139	0.995761	path:mmu00531	Metabolism	Glycan biosynthesis and metabolism	Glycosaminoglycan degradation	0	14
0.908139	0.995761	path:mmu00601	Metabolism	Glycan biosynthesis and metabolism	Glycosphingolipid biosynthesis - lacto and neolacto series	0	14
0.908139	0.995761	path:mmu03060	Genetic Information Processing	Folding, sorting and degradation	Protein export	0	14
0.908139	0.995761	path:mmu04742	Organismal Systems	Sensory system	Taste transduction	0	14
0.914415	0.995761	path:mmu00100	Metabolism	Lipid metabolism	Steroid biosynthesis	0	13
0.914415	0.995761	path:mmu00511	Metabolism	Glycan biosynthesis and metabolism	Other glycan degradation	0	13
0.914415	0.995761	path:mmu00670	Metabolism	Metabolism of cofactors and vitamins	One carbon pool by folate	0	13
0.914415	0.995761	path:mmu00760	Metabolism	Metabolism of cofactors and vitamins	Nicotinate and nicotinamide metabolism	0	13
0.914415	0.995761	path:mmu01040	Metabolism	Lipid metabolism	Biosynthesis of unsaturated fatty acids	0	13
0.920734	0.995761	path:mmu00062	Metabolism	Lipid metabolism	Fatty acid elongation	0	12
0.920734	0.995761	path:mmu00514	Metabolism	Glycan biosynthesis and metabolism	Other types of O-glycan biosynthesis	0	12
0.920734	0.995761	path:mmu01210	Mus Musculus	Metabolic pathways	2-Oxocarboxylic acid metabolism	0	12
0.927096	0.995761	path:mmu00040	Metabolism	Carbohydrate metabolism	Pentose and glucuronate interconversions	0	11
0.927096	0.995761	path:mmu00061	Metabolism	Lipid metabolism	Fatty acid biosynthesis	0	11
0.927096	0.995761	path:mmu00220	Metabolism	Amino acid metabolism	Arginine biosynthesis	0	11
0.927096	0.995761	path:mmu00340	Metabolism	Amino acid metabolism	Histidine metabolism	0	11
0.927096	0.995761	path:mmu04614	Organismal Systems	Endocrine system	Renin-angiotensin system	0	11
0.927096	0.995761	path:mmu04672	Organismal Systems	Immune system	Intestinal immune network for IgA production	0	11
0.927096	0.995761	path:mmu04966	Organismal Systems	Excretory system	Collecting duct acid secretion	0	11
0.927096	0.995761	path:mmu04975	Organismal Systems	Digestive system	Fat digestion and absorption	0	11
0.927096	0.995761	path:mmu05143	Human Diseases	Infectious diseases	African trypanosomiasis	0	11
0.927096	0.995761	path:mmu05340	Human Diseases	Immune diseases	Primary immunodeficiency	0	11
0.933502	0.995761	path:mmu00140	Metabolism	Lipid metabolism	Steroid hormone biosynthesis	0	10
0.933502	0.995761	path:mmu00515	Metabolism	Glycan biosynthesis and metabolism	Mannose type O-glycan biosynthesis	0	10
0.933502	0.995761	path:mmu00533	Metabolism	Glycan biosynthesis and metabolism	Glycosaminoglycan biosynthesis - keratan sulfate	0	10
0.933502	0.995761	path:mmu00604	Metabolism	Glycan biosynthesis and metabolism	Glycosphingolipid biosynthesis - ganglio series	0	10
0.933502	0.995761	path:mmu00730	Metabolism	Metabolism of cofactors and vitamins	Thiamine metabolism	0	10
0.933502	0.995761	path:mmu00790	Metabolism	Metabolism of cofactors and vitamins	Folate biosynthesis	0	10
0.933502	0.995761	path:mmu03430	Genetic Information Processing	Replication and repair	Mismatch repair	0	10
0.933502	0.995761	path:mmu04964	Organismal Systems	Excretory system	Proximal tubule bicarbonate reclamation	0	10
0.933502	0.995761	path:mmu04977	Organismal Systems	Digestive system	Vitamin digestion and absorption	0	10
0.933502	0.995761	path:mmu05033	Human Diseases	Substance dependence	Nicotine addiction	0	10
0.939951	0.995761	path:mmu00120	Metabolism	Lipid metabolism	Primary bile acid biosynthesis	0	9
0.939951	0.995761	path:mmu00130	Metabolism	Metabolism of cofactors and vitamins	Ubiquinone and other terpenoid-quinone biosynthesis	0	9
0.939951	0.995761	path:mmu05150	Human Diseases	Infectious diseases	Staphylococcus aureus infection	0	9
0.946443	0.995761	path:mmu00360	Metabolism	Amino acid metabolism	Phenylalanine metabolism	0	8
0.946443	0.995761	path:mmu00450	Metabolism	Metabolism of other amino acids	Selenocompound metabolism	0	8
0.946443	0.995761	path:mmu00592	Metabolism	Lipid metabolism	alpha-Linolenic acid metabolism	0	8
0.95298	0.995761	path:mmu00053	Metabolism	Carbohydrate metabolism	Ascorbate and aldarate metabolism	0	7
0.95298	0.995761	path:mmu00603	Metabolism	Glycan biosynthesis and metabolism	Glycosphingolipid biosynthesis - globo and isoglobo series	0	7
0.95298	0.995761	path:mmu00770	Metabolism	Metabolism of cofactors and vitamins	Pantothenate and CoA biosynthesis	0	7
0.95298	0.995761	path:mmu00910	Metabolism	Energy metabolism	Nitrogen metabolism	0	7
0.959562	0.995761	path:mmu00750	Metabolism	Metabolism of cofactors and vitamins	Vitamin B6 metabolism	0	6
0.959562	0.995761	path:mmu00920	Metabolism	Energy metabolism	Sulfur metabolism	0	6
0.959562	0.995761	path:mmu03450	Genetic Information Processing	Replication and repair	Non-homologous end-joining	0	6
0.959562	0.995761	path:mmu04122	Genetic Information Processing	Folding, sorting and degradation	Sulfur relay system	0	6
0.966188	0.995761	path:mmu00430	Metabolism	Metabolism of other amino acids	Taurine and hypotaurine metabolism	0	5
0.966188	0.995761	path:mmu00440	Metabolism	Metabolism of other amino acids	Phosphonate and phosphinate metabolism	0	5
0.966188	0.995761	path:mmu00591	Metabolism	Lipid metabolism	Linoleic acid metabolism	0	5
0.966188	0.995761	path:mmu00740	Metabolism	Metabolism of cofactors and vitamins	Riboflavin metabolism	0	5
0.966188	0.995761	path:mmu04744	Organismal Systems	Sensory system	Phototransduction	0	5
0.972859	0.995761	path:mmu04950	Human Diseases	Endocrine and metabolic diseases	Maturity onset diabetes of the young	0	4
0.986338	0.995761	path:mmu00232	Metabolism	Biosynthesis of other secondary metabolites	Caffeine metabolism	0	2
0.986338	0.995761	path:mmu00400	Metabolism	Amino acid metabolism	Phenylalanine, tyrosine and tryptophan biosynthesis	0	2
0.986338	0.995761	path:mmu00471	Metabolism	Metabolism of other amino acids	D-Glutamine and D-glutamate metabolism	0	2
0.986338	0.995761	path:mmu00524	Metabolism	Biosynthesis of other secondary metabolites	Neomycin, kanamycin and gentamicin biosynthesis	0	2
0.986338	0.995761	path:mmu00785	Metabolism	Metabolism of cofactors and vitamins	Lipoic acid metabolism	0	2
0.986338	0.995761	path:mmu05310	Human Diseases	Immune diseases	Asthma	0	2
0.993146	0.996288	path:mmu00290	Metabolism	Amino acid metabolism	Valine, leucine and isoleucine biosynthesis	0	1
0.993146	0.996288	path:mmu00780	Metabolism	Metabolism of cofactors and vitamins	Biotin metabolism	0	1
1	1	path:mmu00472	Metabolism	Metabolism of other amino acids	D-Arginine and D-ornithine metabolism	0	0
