# Supplementary material for: Identification and characterization of distinct brown adipocyte subtypes in C57BL/6J mice
Source: Life Sci Alliance. 2020 Nov 30;4(1):e202000924. doi: 10.26508/lsa.202000924 (PMC7723269; doi:10.26508/lsa.202000924)
Supplement: Supplementary file 15 [file LSA-2020-00924_SdataF6.1.xlsx]

## Sheet: Figure6C
	BAT1																				BAT2																							BAT3
	1A2	1A3	1A5	1A6	1B1	1B3	1B4	1B5	1B6	1C2	1C3	1C4	1C5	1C6	1D1	1D2	1D3	1D4	1D5	1D6	2A1	2A3	2A7	2A10	2A11	2A12	2B4	2B5	2B6	2B10	2B11	2C1	2C6	2C7	2C8	2C9	2C12	2D2	2D5	2D6	2D10	2D11	2D12	3A3	3A9	3A10	3B1	3B3	3B4
Eif5	9.06307	10.7034	5.73582	5.85634	18.1261	13.4543	7.21	11.2356	22.0087	4.99332	5.38893	7.51618	4.19887	2.96905	7.83536	6.86852	6.06287	8	3.01049	8.81524	49.8665	44.3235	37.2715	29.6508	36.7584	48.1679	28.6408	35.5062	45.5696	29.8571	70.0348	16	38.8542	67.1819	45.5696	37.5307	72.0037	55.7152	50.2134	33.5909	50.2134	36.7584	41.6429	20.1122	14.1233	17.6305	12.9063	9.84915	9.84915
	8.51496	13.5479	10.5561	23.7524	60.5477	69.551	16.7955	53.0765	26.3549	4.31691	2.51403	2.8481	2.67585	2.46229	5.93809	4.37718	4.53154	11.9588	5.02805	13.737	37.7918	40.2244	45.8866	34.2968	42.5179		23.1029	26.3549	40.2244	26.3549	72.0037	19.8353	29.0406	65.7993	30.4844	61.8199	62.6829	37.5307	44.6318	26.5382	97.6806	32.2226	44.3235	22.4711	14.723	18.1261	9.44794	8.45614	9.78112
	4	2.78949	4.40762	3.03143	7.3615	5.65685	4.40762	4.50023	11.4716	7.6211	7.83536	10.9283	7.21	6.49802	9.98664	8.57419	11.7942	13.5479	6.49802	18.6357	22.7848	25.6342	22.1618	15.2422	24.9333	21.4068	16.1113	27.2843	28.2465	19.1597	33.5909	9.00047	17.1484	41.0696	18.8959	24.2515	33.5909	27.0958	29.2426	14.42	21.1121	24.084	24.2515	30.4844	23.2636	29.0406	20.1122	19.6983	18.6357
																					16.9123	17.7531	26.3549	15.1369	23.2636	21.8566	28.0514	15.2422	37.014	11.7942	35.0174	7.46426	14.9285	20.5348	17.6305	20.2521	28.84	18.507	19.1597	12.6407	25.4572	18.3792	16.7955	32.2226	24.2515	28.84	16	15.6707	23.4254
Tcf25	5.54044	7.78124	5.77572	7.72749	6.86852	7.1602	6.27667	9.06307	5.89708	8.9383	7.88986	7.4127	8.45614	3.94493	11.3924	4.31691	3.29436	5.24157	4.02782	6.9163	46.2057	38.8542	30.4844	50.5626	80.4488	58.0812	63.5579	83.2859	33.5909	107.635	38.5859	35.261	98.36	33.3589	43.7133	74.028	59.3016	48.5029	81.0084	112.986	46.2057	39.1245	39.3966	24.761	26.1729	26.9087	29.2426	22.3159	16.6794
	3.13834	4	3.11666	4.43828	5.77572	3.55537	3.94493	4.92458	3.63008	5.89708	6.58873	3.63008	5.50217	3.29436	5.61778	3.29436	2.82843	3.05252	2.73208	2.54912	48.5029	45.5696	41.9326	48.1679	97.6806		65.7993	65.7993	55.3304	98.36	44.3235	44.3235	75.0614	47.1766	36.0019	112.986	41.3553	41.6429	67.1819	101.125	118.603	66.7178	48.5029	42.2243	26.9087	27.6652	17.2676	13.6422	15.3482
	6.77396	5.24157	7.01285	7.78124	9.98664	4.28709	4.31691	5.77572	5.06303	10.4832	7.83536	5.9794	9.06307	7.4127	12.9063	7.83536	6.19026	9.51366	4.95883	8	36.5044	37.7918	30.4844	30.2738	54.1917	32.6724	64	70.0348	27.8576	66.7178	26.1729	21.7057	44.6318	31.5594	29.6508	48.1679	41.9326	41.3553	58.4852	63.1189	25.2813	37.7918	29.6508	44.0173	46.5271	49.5221	48.5029	31.3414	26.5382
	4.75047	4.75047	12.889	9.50095	14.5009	5.8892	6.13929	4.19326	5.12685	4.2518	5.38174	11.2205	4.88403	3.72715	9.43532	5.72816	4.40173	6.48934	3.15595	3.04844	17.1484	20.393	24.084	21.8566	28.443	24.4201	75.0614	33.3589	24.2515	39.6707	20.9663	13.4543	37.5307	13.6422	13.9288	26.9087	18.0009	16.4498	31.3414	39.6707	20.2521	18.2522	17.0299	44.3235	52.7098	53.0765	30.4844	27.2843	41.9326
	2.24711	2.20087	2.61729	2.80514	4.2518	1.98353	2.67228	2.4761	2.4084	2.78576	2.31029	2.92426	2.4761	1.63362	7.77085	2.14068	2.59921	3.42968	1.30864	2.72843
Bin1	0.0376815	0.285191	0.036906	0.139661	0.19751	0.175556	0.168404	0.098073	0.196146	0.562529	0.578344	0.119908	0.346277	0.41466	0.281265	0.562529	0.22688	0.0356489	0.332171	0.0940779	0.208772	0.148651	0.101532	0.129408	0.456916	0.339151	0.316439	0.510506	0.11908	0.858565	0.236514	0.0953912	0.50698	0.22688	0.184284	2.37841	0.25349	0.0953912	2.47941	0.646176	0.203063	0.174343	0.112656	0.149685	0.0947323	0.167241	0.108067	0.157127	0.0514744
	0.0230355	0.194791	0.0260965	0.0555527	0.102949	0.0579117	0.0774817	0.0620683	0.160428	0.184284	0.239816	0.0213444	0.132127	0.297302	0.0595399	0.173139	0.0660636	0.0124303	0.216134	0.0332616	0.204476	0.154964	0.15283	0.183011	0.659754		0.323088	0.31864	0.231647	0.632878	0.395021	0.151774	0.435275	0.264255	0.131215	3.78423	0.154964	0.0717937	1.47427	0.632878	0.920188	0.279322	0.100134	0.211686	0.0994421	0.189465	0.07966	0.0847878	0.0451228
	0.017579	0.213159	0.0490365	0.141611	0.153893	0.136787	0.0620683	0.0896222	0.0607909	0.236514	0.189465	0.0366511	0.225313	0.269807	0.0607909	0.115823	0.049721	0.0248605	0.214641	0.0356489	0.0656073	0.0683934	0.0486978	0.0514744	0.190782	0.103665	0.238159	0.181747	0.0361465	0.607097	0.0836205	0.046714	0.15822	0.103665	0.0529216	1.29235	0.0960547	0.0490365	1.18099	0.217638	0.0409498	0.193446	0.0500669	0.269807	0.251739	0.285191	0.257028	0.301452	0.15932
																					0.0421011	0.0432847	0.0575117	0.0493776	0.0871715	0.0877778	0.61132	0.111878	0.0642571	0.371131	0.0960547	0.0339605	0.125869	0.0674518	0.0438889	0.926588	0.0500669	0.0268302	0.823591	0.236514	0.0571145	0.0679209	0.0281641	0.210224	0.320856	0.353553	0.230047	0.332171	0.193446
Prdm16	0.323088	0.0712977	0.406126	0.273573	0.429283	0.336808	0.301452	0.343886	1.37554	0.0109722	0.060371	0.135842	0.0285572	0.0214928	0.100134	0.0780207	0.188156	0.360982	0.0540336	0.376312	1.02101	0.790041	0.790041	0.435275	0.0960547	0.747425	0.332171	0.00749425	1.07923	0.0915054	1.60214	0.406126	0.0354026	1.36604	1.07177	0.25	1.72907	0.876606	0.0224055	0.00608722	0.655197	0.283221	0.933033	0.279322	0.0483614	0.0310341	0.0947323	0.0824692	0.0306069
	0.132127	0.00995751	0.0813339	0.0665231	0.150726	0.0902456	0.0712977	0.120742	0.19751	0.00529924	0.0275845	0.0947323	0.0243489	0.0155171	0.0743254	0.0708052	0.060371	0.147624	0.0138882	0.0960547	0.524858	0.641713	0.784584	0.378929	0.0432847		0.174343	0.00866851	0.547147		1.31039	0.400535	0.0314674	1.47427	0.598739	0.476319	1.3566	0.870551	0.00259509	0.00464534	0.566442	0.0679209	1.55833	0.31864	0.0595399	0.0179484	0.0547879	0.0415214	0.0824692
	0.205898	0.0101667	0.171943	0.0994421	0.157127	0.0158431	0.147624	0.073812	0.29937	0.00306478	0.0169802	0.210224	0.0122591	0.0180732	0.220676	0.231647	0.358489	0.251739	0.0137922	0.269807	0.368567	0.309927	0.323088	0.210224	0.0908733	0.109576	0.149685	0.0406669	0.528509		0.400535	0.196146	0.0987552	0.732043	0.351111	0.25	1.47427	0.773783	0.02836	0.00467765	0.225313	0.161544	0.673617	0.15932	0.0102374	0.0116785	0.118257	0.0698304	0.0463914
	0.76313	0.060371	0.543368	0.473029	0.920188	0.122427	0.768438	0.63728	2.17347	0.00571908	0.0441942	0.554785	0.036906	0.0547879	0.864537	0.411795	1.13288	0.939523	0.0473661	0.779165	0.241484	0.22688	0.320856	0.168404	0.192109	0.0842021	0.257028	0.00474295	0.469761	0.00564035	0.429283	0.157127	0.0211969	0.353553	0.234881	0.133046	0.582367	0.366021	0.00487629	0.0138882	0.275476	0.105843	0.466517	0.0638133	0.0197774	0.018199	0.0769465	0.0563282	0.0567199
Ppargc1a	0.707107	0.384219	0.933033	0.870551	0.952638	0.784584	0.773783	0.823591	2.09943	0.376312	0.334482	0.346277	0.223756	0.0743254	0.289172	0.246558	0.323088	0.210224	0.170755	0.444421	6.49802	3.5801	5.6962	2.08493	0.30566	2.96905	0.566442	0.0514744	6.9644	0.0651541	17.6305	2.32947	0.0185814	11.8762	4.72397	0.244855	17.7531	4.22807	0.111878	0.0220971	2.05623	0.156041	2.90795	0.939523	0.012344	0.008851	0.668964	0.366021	0.151774
	0.773783	0.244855	0.598739	0.320856	0.343886	0.20733	0.34151	0.659754	0.460094	0.291183	0.214641	0.283221	0.22688	0.208772	0.220676	0.257028	0.257028	0.303549	0.275476	0.870551	2.88786	2.75108	3.41054	0.742262	0.142595		0.309927	0.0172173	4.28709	0.00630189	16.4498	2.86791	0.00860863	18.1261	2.58471	0.143587	24.59	3.81055	0.115023	0.0224056	2.67586	0.0275845	2.62079	0.196146	0.01243	0.016631	0.61132	0.334482	0.228458
	0.408951	0.133972	0.241484	0.287175	0.289172	0.0583146	0.334482	0.203063	0.641713	0.175556	0.128514	0.312083	0.181747	0.0412346	0.25	0.269807	0.479632	0.225313	0.0674518	0.356013	4.50023	2.82843	3.63008	0.993092	0.279322	0.655197	0.0514744	0.0222508	5.31474	0.130308	9.25351	1.52626	2.32947	14.9285	2.63902	0.174343	18.3792	2.73208	0.0693481	0.0185814	1.98618	0.0638133	1.39474	1.82766	0.068869	0.036147	0.392292	0.435275	0.093428
	0.876606	0.108819	0.348686	0.411795	0.812252	0.154964	0.784584	0.646176	2.01391	0.060371	0.0818996	0.45376	0.184284	0.0947323	0.757858	0.408951	1.04247	0.469761	0.105843	0.687771	2.12874	1.61328	3.65533	0.469761	0.363493	0.615572	0.034674	0.0211969	4.22807	0.036906	6.27667	1.24833	0.0107464	4.19887	1.67018	0.0830429	11.3137	1.54756	0.0314674	0.00843147	1.24833	0.0813339	0.895025	2.25012	0.085971	0.036398	0.271684	0.316439	0.153893
Ucp1	0.170896	0.00217332	0.749451	0.00443394	0.889077	15.987	0.042145	0.0278242	13.7702	0.0355442	0.0548829	0.0118403	0.0315827	0.00129139	0.280778	0.463341	0.0273399	0.0427684	0.000786573	0.0378785	12.4666	7.83536	3.24901	0.220676	0.0119239	2.04202	0.0250334		13.0864	0.0119239	222.861	0.952638	0.00739108	154.343	13.5479	0.00041345	304.437	8.05564			1.70527	0.034674	11.4716	0.179244	1.80205e-05	3.2482e-05	0.0125167	0.0209051	0.014885
	0.297887	0.486864	0.28776	0.0274048	4.75374	5.86045	0.10464	0.302	22.0004	0.013015	0.0384625	0.00913273	0.0653027	0.040302	0.113718	0.352154	0.0461924	0.217414	0.00739713	1.94878	0.876606	1.15669	1.29235	0.0423939			0.00713931	0.00704102	1.05702		142.025	0.166086		115.36	1.03527		198.088	1.86607			0.0448111	0.00112178	3.97237	0.0162885	8.1205e-06	1.9048e-05	0.0147822	0.0177013	0.0203335
	0.031912	0.0034413	0.0276171	0.371712	0.420606	0.0859418	0.0632169	0.0124987	0.331683	0.00388093	0.0201423	0.0144309	0.0730525	0.00346969	0.0523067	0.729903	0.0185316	0.0245849	9.57215e-05	0.0109683	3.605	5.02805	1.47427	0.107321	0.0151977	0.309927	0.000391147	0.00170029	6.49802		61.3929	0.528509	1.56917	47.5048	2.21914	0.000502009	101.125	2.92817	5.5008e-05	0.000146177	3.07375	0.00909948	3.86375	0.646176	0.000740096	3.38614e-05	0.0612138	0.0285572	0.0206173
	0.00571383	0.00174726	0.00658453	0.0035017	0.144374	0.0024168	0.0117157	0.00637038	0.286946	0.000887606	0.00123451	0.00331098	0.000477222	0.000390943	0.0494295	0.00932681	0.00656939	0.0232791	0.000472225	0.0251918	2.53151	2.11404	0.293209	0.0219445	0.00872881	0.111878		0.000488281	7.31065	0.0157337	28.443	0.264255		17.1484	1.06437		91.7731	1.79005	4.7839e-05	0.000354974	2.08493	0.00160858	3.03143	0.864537	0.000644291	0.000592869	0.0112028	0.0203335	0.0250334
	0.0684727	0.00172933	0.0177017	0.0155242	0.33705	2.13805	0.099253	0.026134	6.58682	0.00373767	0.0130603	0.0129812	0.00639433	0.000238333	0.0647223	0.304013	0.030832	0.0505538	0.008534	0.181284
Pparg	12.0692	0.469792	7.88596	4.41349	22.0227	22.8893	7.84598	12.4171	31.3881	7.91889	4.20078	16.1066	5.94704	0.363622	9.95719	1.52448	6.96554	21.2057	1.07162	26.5884	11.8762	9.91766	8.75435	14.3204	8.22491	18.7654	7.67411	0.184284	8.45614	0.176777	19.5622	9.38268	0.248273	18.6357	12.3805	0.986233	24.9333	12.8171	0.726986	0.400535	9.98664	7.46426	13.8326	8.75435	0.115023	0.094078	4.78991	3.68075	7.26015
	12.565	0.305646	8.73157	8.70587	9.6649	5.54042	9.16513	6.92399	14.8432	0.439596	0.361787	9.32368	0.666192	0.14708	7.99378	5.58728	9.97381	11.7863	0.251966	10.6143	16.5642	12.7286	11.9588	11.3137	3.01049		3.97237	0.059954	12.6407	0.141611	21.7057	9.06307	0.203063	29.446	11.6318	0.80107	26.5382	15.8895	0.528509	0.371131	10.0561	1.75321	19.9733	2.49666	0.089003	0.115023	6.6807	5.77572	9.06307
	23.648	1.78552	22.6468	24.2055	35.6432	14.6646	15.7129	24.1348	34.1618	11.3216	2.22106	22.2298	9.79446	0.545073	17.3768	8.07447	19.5477	24.903	0.720054	14.0561	10.6295	12.295	9.12611	8	9.06307	14.1233	0.619854	0.0780207	9.06307	0.0245182	16.6794	6.77396	1.16473	11.3924	11.0809	0.752623	24.59	17.0299	0.332171	0.183011	10.4107	3.89062	10.9283	10.7034	0.271684	0.105112	3.68075	4.92458	5.02805
	17.8386	0.650921	6.77946	6.17651	7.61504	12.8223	12.1221	9.99526	40.2099	6.15866	4.23438	9.8211	6.17082	0.383783	6.77157	0.848296	6.98093	26.0759	0.586586	25.2962	5.93809	6.54322	5.16941	5.1337	8.11168	14.5203	0.373712	0.0758872	6.49802	0.0441942	14.5203	5.50217	0.060371	10.3388	4.02782	0.469761	17.7531	5.61778	0.266093	0.142595	8.51496	4	9.84915	17.5087	0.30566	0.141611	8	6.82108	12.6407
	28.2104	7.32361	24.1553	19.8662	29.6211	17.2477	14.2203	26.5157	38.9858	7.8196	8.43316	24.992	5.17807	0.23743	10.6182	3.90733	18.2854	28.9547	0.832457	33.5518
[truncated: 18 more columns]

## Sheet: Figure6D
BAT tissue	30°C	5°C
Ucp1	1.46597	22.588
	0.589114	30.5571
	2.95864	12.2149
	1.93781	16.2719
	1.4127	18.3356
	0.682435	13.8853
	0.262432	21.9734
	0.84656
Eif5	0.06	0.24
	0.03	0.36
	0.05	0.22
	0.03	0.29
	0.05	0.24
	0.04	0.19
	0.01
	0.14
Tcf25	0.0445016	0.175556
	0.0748424	0.105843
	0.0595399	0.140632
	0.0616395	0.11744
	0.0620683	0.115824
	0.0607909	0.184284
	0.02836
	0.0544094
Bin1	5.08788e-05	0.00209439
	4.827e-06	0.000757567
	3.89836e-05	0.000137273
	1.57009e-05	0.000218646
	3.1038e-05	0.000235541
	1.83378e-05	0.000160206
	5.12768e-06	0.0001899
	0.000714517

## Sheet: Figure6E
BAT tissue	Chow	HFD [60%]
Ucp1	18.0879	19.9135
	21.0116	7.69415
	27.0304	13.9149
	20.5666	12.5309
		22.3785
Eif5	0.227343	0.212541
	0.698661	0.130221
	0.465603	0.103889
	0.292238	0.147555
		0.196395
		0.16699
Tcf25	0.0268302	0.0571145
	0.0785633	0.0587202
	0.103665	0.029977
	0.0642571	0.0559391
		0.0518325
		0.0712977
Bin1	0.000180071	0.000224689
	0.000298525	0.000112605
	0.00663112	8.71108e-05
	0.000139237	0.000217924
		0.000742366
		0.000572972
