# Supplementary material for: Identification and characterization of distinct brown adipocyte subtypes in C57BL/6J mice
Source: Life Sci Alliance. 2020 Nov 30;4(1):e202000924. doi: 10.26508/lsa.202000924 (PMC7723269; doi:10.26508/lsa.202000924)
Supplement: Supplementary file 18 [file LSA-2020-00924_SdataFS5.xlsx]

## Sheet: FigureS5G
	iBAT	sBAT	iWAT	SC	PG
P2rx5	4.53154	6.02099	0.823591	0.846745	0.059954
	4.82323	4.69134	0.566442	0.952638	0.128514
	6.06287	6.40856	1.93187	0.913832	0.0683934
Eif5	11.7942	11.3924	8	10.126	6.45313
	12.042	11.4716	8.57419	11.3924	6.6807
	10.4832	10.7034	10.1965	9.98664	6.54322
Tcf25	8.87655	11.1579	8.33973	10.7034	7.51618
	9.84915	9.57983	10.4107	10.4107	7.46426
	9.78112	8.51496	9.38268	10.3388	7.88986
Bin1	0.0341967	0.0438889	0.111878	0.123279	0.0743254
	0.0314674	0.0281641	0.0921418	0.124137	0.0612138
	0.0332616	0.0334929	0.072293	0.140632	0.0625

## Sheet: FigureS5H
	Supraclavicular						Periadrenal						Subcutaneous
UCP1	0.0327341	0.00961612	0.00419759	0.0118577	0.216272	0.0280543	0.00156315	0.0177419	9.72747e-05	0.0380189	0.034914	0.000776247	1.30017e-05	2.97167e-05	1.34276e-06	0.000500035	3.04789e-05
EIF5	0.00385478	0.00732824	0.00323594	0.0968278	0.00707946	0.244906	0.00405508	0.00269154	0.00107895	0.0357273	0.00620869	0.0688652	0.00186209	0.00995405	0.00103753	0.0642688	0.13122
BIN1	2.99226e-07	0.0101859	6.36796e-06	0.00803526	0.00186638	0.0370681	2.05589e-06	0.0165577	1.38357e-05	0.00781628	0.0588844	0.00374111	6.45654e-07	9.37562e-07	1.89234e-06	0.0189234	0.00818465
TCF25	0.00489779	0.00463447	3.55631e-07	0.258821	0.00274157	0.123595	0.0097051	0.00350752	2.36592e-05	0.100693	0.0113501	0.0198609	0.00468813	0.00508159	3.79315e-07	0.0221309	0.166725
