# Supplementary material for: Identification and characterization of distinct brown adipocyte subtypes in C57BL/6J mice
Source: Life Sci Alliance. 2020 Nov 30;4(1):e202000924. doi: 10.26508/lsa.202000924 (PMC7723269; doi:10.26508/lsa.202000924)
Supplement: Supplementary file 20 [file LSA-2020-00924_SdataF7.2.xlsx]

## Sheet: Figure7G
	shScr	shEif5	shTcf25	shBin1
ORO quantification	28.2443	45.8222	44.5115	47.4587
	34.3381	35.9062	38.501	36.2424
	44.7053	49.0247	39.7632	40.1399
	40.9438	41.8139	48.5675	62.9027

## Sheet: Figure7H
		shScr	shEif5	shTcf25	shBin1
Pparg	Adipocytes	3.31728	3.29436	2.58471	1.94531
		1.07177	2.53151	1.25701	2.42839
		2.44528	2.46229	1.7411	1.89211
		1.90528	1.89211	1.24833	1.1487
		0.615572	1.7411	1.68179	1.81504
		2.2974	2.96905	3.01049	2.04202
	Adipocytes+CL	4.25748	3.63008	2.82843	2.96905
		1.15669	1.17284	1.06437	1.84038
		3.97237	2.31338	2.09943	2.2974
		4.02782	3.70635	2.8481	2.18859
		2.09943	2.05623	3.27161	2.04202
		3.70635	4.02782	3.22657	2.36198
Ucp1	Adipocytes	2.41959	2.72664	2.4226	2.89522
		1.51349	3.2986	2.34132	2.67848
		3.06079	4.12643	3.7953	3.708
		2.15168	2.99155	2.96747	2.49485
		2.35036	2.74771	2.63935	3.17819
		2.67547	2.69955	2.38347	3.06681
	Adipocytes+CL	4.53583	4.45756	4.45456	4.70441
		4.21975	4.98437	4.90309	5.10779
		4.84589	5.32152	5.34861	5.42688
		4.06924	5.21616	4.86396	4.59604
		4.81278	5.03253	4.85492	5.13187
		4.67431	4.42144	4.54486	4.71645

## Sheet: Figure7I
	shScr	shEif5	shScr	shTcf25	shScr	shBin1
Adipocytes	0	0.962102	0	0.616365	0	1.89078
	0	0.680198	0	0.638572	0	1.3842
	0	1.14643	0	1.09654	0	2.40377
	0	1.79872	0	0.722547	0	1.92762
	0	0.0333168	0	-0.185712	0	-0.0380381
	0	1.45431	0	-0.571782	0	1.97078
	0	0.326552	0	0.0582677
Adipocytes+CL	1.95768	2.68202	1.95768	2.30347	1.95768	2.84174
	1.51914	2.25719	1.51914	2.18056	1.51914	2.53762
	1.2578	2.69616	1.2578	2.1578	1.2578	2.86069
	-0.390011	2.33145	1.93818	1.70468	0.271261	2.85328
	0.3479	0.743059	1.43389	1.58902	-0.786723	1.53508
	1.73286	1.78693	1.2382	1.15132	2.1093	2.82944
	0.960789	1.08903	0.295293	0.0802169

## Sheet: Figure7J
	Oxygen Consumption Rates (normalized to non-mitochondria respiration)
Time (minutes)	shScr			shEif5			shTcf25			shBin1
1.30438	77.5373	78.6487	104.688	83.9488	68.5996	91.5877	71.9113	79.1204	89.1006	103.943	90.6049	138.167
8.81237	71.7909	76.6468	101.558	77.9625	67.001	90.5952	71.4098	79.141	93.2435	98.512	91.1304	134.449
16.3407	71.8393	73.1871	99.4635	77.5078	64.9423	88.9116	73.1874	78.3721	93.3064	98.7908	88.741	131.485
23.8669	69.1001	70.9952	100.996	74.9633	62.6289	89.9185	70.8603	75.7077	94.9046	94.8979	87.2514	130.021
31.4929	67.8716	68.0391	99.881	75.8441	59.5147	87.7331	70.3327	75.8585	96.8429	97.0814	84.3505	136.669
39.0226	67.6286	69.0056	104.552	78.5417	58.6599	92.3518	70.0876	74.1882	99.2426	97.9706	82.6147	145.803
46.5836	67.1758	68.7886	106.424	78.8485	57.5633	92.6024	69.97	74.2479	100.402	97.6426	84.049	149.391
54.1166	66.8213	67.443	105.773	78.8425	55.8266	90.2498	69.8543	72.8454	99.2253	97.9246	83.208	150.31
61.7543	21.031	34.398	43.785	39.1541	22.9208	46.7585	27.7481	35.018	49.7483	49.8959	35.0406	86.9374
69.2809	19.6994	34.529	41.0582	36.8587	24.0685	45.7249	25.0151	33.3447	48.3315	47.2649	32.9683	85.3543
76.8069	18.5312	33.4715	37.5651	34.7486	23.8749	42.7039	23.3207	31.5814	47.3379	45.0352	31.2652	83.9624
84.3335	16.8994	32.0352	34.0617	32.262	23.3709	37.6964	21.6852	29.8257	45.2361	43.1231	29.3783	81.9344
91.9607	174.341	115.729	188.292	170.328	114.409	184.471	127.734	125.607	172.343	188.94	190.388	263.979
99.5023	160.599	114.294	178.647	168.24	108.584	193.433	108.65	115.474	149.476	177.003	178.049	250.218
107.037	147.693	110.557	162.365	167.898	105.118	185.303	98.8723	105.12	131.471	164.655	167.124	233.437
114.58	138.976	107.863	156.3	167.076	100.732	184.861	94.0024	99.9983	127.197	155.525	159.56	230.086
122.21	-3.42549	0.575582	0.708845	-1.17715	-1.82109	-1.80263	0.554558	1.60751	1.06378	0.769395	4.10604	1.30287
129.756	1.51587	-0.162997	1.06658	1.03375	-0.443995	1.27771	0.848908	0.286708	1.17855	1.72378	0.1432	2.02211
137.31	1.60496	0.0861025	-0.076375	1.01418	0.828635	0.797368	0.0182075	-0.616302	-0.07213	0.222065	-1.42023	-0.0600275
144.872	0.30466	-0.498688	-1.69905	-0.87078	1.43646	-0.272442	-1.42167	-1.27791	-2.1702	-2.71524	-2.82901	-3.26496
